# Supplementary material for: Expanding Alternative Splicing Identification by Integrating Multiple Sources of Transcription Data in Tomato
Source: Front Plant Sci. 2019 May 28;10:689. doi: 10.3389/fpls.2019.00689 (PMC6546887; doi:10.3389/fpls.2019.00689)
Supplement: Supplementary file 2 [file Table_2.XLSX]

## Sheet: geneModel2ASid
Supplementary Table 2. Gene models and corresponding transcripts generated by alternative splicing
Solyc00g309530.1.1	Sly00006343 Sly00006344
Solyc00g311230.2.1	Sly00003966 Sly00006349 Sly00349176 Sly00006350 Sly00006348 Sly00367944
Solyc00g294237.1.1	Sly00006333 Sly00003913 Sly00006334
Solyc00g167800.1.1	Sly00006206 Sly00003241
Solyc00g170210.3.1	Sly00007174 Sly00007176 Sly00007177
Solyc00g304030.2.1	Sly00006338 Sly00003939
Solyc00g170510.2.1	Sly00004848 Sly00007180 Sly00004849
Solyc00g172410.2.1	Sly00007182 Sly00007183
Solyc00g289230.2.1	Sly00007312 Sly00007313 Sly00007314 Sly00007315 Sly00007316 Sly00007327 Sly00007321 Sly00007322 Sly00007332 Sly00007318 Sly00007317 Sly00007331 Sly00007333 Sly00007324 Sly00007319 Sly00007334 Sly00007335 Sly00007325 Sly00007328 Sly00007320 Sly00007326
Solyc00g171710.2.1	Sly00006208 Sly00006209 Sly00003260
Solyc00g308930.1.1	Sly00007341 Sly00007342
Solyc00g178340.2.1	Sly00006216 Sly00006217 Sly00003315 Sly00003313
Solyc00g180440.2.1	Sly00007195 Sly00007196
Solyc00g318130.2.1	Sly00006354 Sly00006355 Sly00006357 Sly00003980 Sly00006356
Solyc00g181250.2.1	Sly00006222 Sly00003328 Sly00006223
Solyc00g180840.2.1	Sly00006221 Sly00003325
Solyc00g183050.2.1	Sly00006225 Sly00006226 Sly00003337 Sly00003338
Solyc00g184350.3.1	Sly00005001 Sly00005002 Sly00007199 Sly00007201 Sly00007200 Sly00007202
Solyc00g006490.3.1	Sly00005435 Sly00005437 Sly00005436 Sly00005442 Sly00005444 Sly00005471 Sly00005439 Sly00000916 Sly00005443 Sly00005441 Sly00005445 Sly00005438 Sly00005472 Sly00005440 Sly00000910 Sly00005446 Sly00005475 Sly00005466 Sly00000912 Sly00000906 Sly00005448 Sly00005452 Sly00000917 Sly00005450
Solyc00g042640.1.1	Sly00005940 Sly00005941
Solyc00g091170.3.1	Sly00002706 Sly00002704 Sly00006059 Sly00002705
Solyc03g033910.1.1	Sly00005225
Solyc00g094530.1.1	Sly00002721
Solyc00g278110.3.1	Sly00007303 Sly00005222
Solyc00g269810.2.1	Sly00007269 Sly00005195
Solyc00g273110.2.1	Sly00007274 Sly00007273 Sly00007277 Sly00005207 Sly00007280 Sly00005209 Sly00005208 Sly00007276 Sly00007278 Sly00007279 Sly00007281 Sly00007283 Sly00005206 Sly00007275 Sly00007282 Sly00007284 Sly00007286 Sly00007289 Sly00007291 Sly00007287 Sly00005210 Sly00007290 Sly00007294 Sly00007292 Sly00007285 Sly00007288 Sly00007296
Solyc00g011880.3.1	Sly00001657 Sly00005720 Sly00001658 Sly00001659 Sly00001660
Solyc00g010760.1.1	Sly00006568 Sly00006567
Solyc00g098560.3.1	Sly00006068 Sly00002763 Sly00002762 Sly00002764 Sly00002766 Sly00006074 Sly00002765 Sly00006069 Sly00006073 Sly00006071 Sly00006076 Sly00006072 Sly00006075
Solyc00g040290.2.1	Sly00006821
Solyc00g011890.3.1	Sly00006576 Sly00006578 Sly00006581 Sly00006586 Sly00006596 Sly00006598 Sly00006577 Sly00006592 Sly00006593 Sly00006599 Sly00006582 Sly00006583 Sly00006591 Sly00006588 Sly00006590 Sly00004220 Sly00006580 Sly00006594 Sly00004222
Solyc00g044750.2.1	Sly00004388 Sly00004389 Sly00004390 Sly00006831
Solyc00g100880.3.1	Sly00006082 Sly00006083 Sly00006084
Solyc00g107055.1.1	Sly00006983 Sly00006984 Sly00006988 Sly00006986 Sly00006989
Solyc00g104940.1.1	Sly00006976 Sly00006978
Solyc00g005285.1.1	Sly00006396 Sly00006397 Sly00006398 Sly00006399
Solyc00g009110.3.1	Sly00005609 Sly00001505 Sly00005612 Sly00005614 Sly00005640 Sly00005641 Sly00005620 Sly00005622 Sly00005623 Sly00001510 Sly00005632 Sly00005613 Sly00005617 Sly00001516 Sly00005628 Sly00005630 Sly00005642 Sly00005646 Sly00005616 Sly00005626 Sly00005647 Sly00001506 Sly00005658 Sly00005634 Sly00005643
Solyc00g009140.3.1	Sly00001524 Sly00005670 Sly00005665 Sly00005668 Sly00001525 Sly00001527 Sly00001528 Sly00001526 Sly00005669
Solyc00g009141.1.1	Sly00004177 Sly00006539 Sly00006544 Sly00006541
Solyc00g110870.3.1	Sly00007005 Sly00007007 Sly00007004 Sly00007006 Sly00004642 Sly00007008 Sly00007009 Sly00007010 Sly00004643
Solyc00g009080.3.1	Sly00001492 Sly00001496 Sly00001493 Sly00005607
Solyc00g009760.2.1	Sly00001555 Sly00005685 Sly00005684
Solyc00g112190.2.1	Sly00007015 Sly00007018
Solyc00g111170.2.1	Sly00006095 Sly00006096
Solyc00g112505.1.1	Sly00007019 Sly00007020
Solyc00g112930.3.1	Sly00004659 Sly00007023 Sly00007024 Sly00007029 Sly00007026 Sly00007027 Sly00007030
Solyc00g118680.2.1	Sly00006107 Sly00004685 Sly00007042 Sly00006108 Sly00007043
Solyc00g117655.1.1	Sly00006109
Solyc00g010525.1.1	Sly00005697 Sly00005698
Solyc00g011160.2.1	Sly00005706 Sly00005707
Solyc00g257110.3.1	Sly00007262 Sly00007263 Sly00007264
Solyc00g247300.3.1	Sly00003675
Solyc00g249200.2.1	Sly00007257
Solyc00g006090.1.1	Sly00005419 Sly00005420
Solyc00g006907.1.1	Sly00006477 Sly00006478
Solyc00g053740.2.1	Sly00005990 Sly00005991 Sly00002375
Solyc00g057880.3.1	Sly00005997 Sly00005998 Sly00005999 Sly00006000 Sly00002418 Sly00002421 Sly00006001 Sly00002419 Sly00002420
Solyc00g127670.2.1	Sly00007057 Sly00004719 Sly00007059 Sly00006133 Sly00007068 Sly00002954 Sly00007061 Sly00007062 Sly00007063 Sly00007066 Sly00007060 Sly00007058 Sly00007065 Sly00004718 Sly00002955 Sly00002956 Sly00007067
Solyc00g125990.2.1	Sly00006126 Sly00006127 Sly00006130 Sly00006129
Solyc00g117653.1.1	Sly00007039 Sly00007041 Sly00007038 Sly00004668 Sly00004671 Sly00004669 Sly00004673
Solyc12g077467.1.1	Sly00007040 Sly00602054 Sly00602055 Sly00582351 Sly00582350 Sly00602043
Solyc00g215560.2.1	Sly00006262 Sly00006263 Sly00006264 Sly00006268 Sly00006266 Sly00006265 Sly00003504 Sly00006269 Sly00006276 Sly00006270 Sly00006274 Sly00006273 Sly00006275
Solyc00g209460.2.1	Sly00007233 Sly00005068
Solyc00g007600.2.1	Sly00006484 Sly00006483 Sly00006482 Sly00006486
Solyc12g010545.1.1	Sly00004455
Solyc00g059500.2.1	Sly00006004 Sly00006003 Sly00002436 Sly00002437 Sly00002435 Sly00253578 Sly00253579
Solyc00g007920.1.1	Sly00006488 Sly00006489
Solyc00g230060.2.1	Sly00003591 Sly00006290
Solyc00g005040.3.1	Sly00005298 Sly00000126 Sly00005301 Sly00005300 Sly00005302
Solyc00g133110.2.1	Sly00007084 Sly00007085 Sly00003007 Sly00007086 Sly00007087 Sly00003008 Sly00017505
Solyc00g128870.3.1	Sly00002973 Sly00006138 Sly00002972 Sly00006139 Sly00002974
Solyc00g005050.3.1	Sly00006366 Sly00006367 Sly00006368 Sly00004016 Sly00004018 Sly00006369 Sly00004019
Solyc00g136560.3.1	Sly00004749 Sly00007105
Solyc00g005092.1.1	Sly00005316 Sly00005317
Solyc00g009030.2.1	Sly00006519 Sly00006520 Sly00006523 Sly00006525 Sly00006521 Sly00006526 Sly00006524 Sly00006522
Solyc00g009040.3.1	Sly00005600 Sly00001487 Sly00001486 Sly00005604 Sly00005602 Sly00005603 Sly00001485
Solyc00g217960.1.1	Sly00003517 Sly00003516
Solyc00g009050.2.1	Sly00006527 Sly00004168
Solyc00g066140.1.1	Sly00006879 Sly00004477
Solyc00g006810.3.1	Sly00001219 Sly00005517 Sly00005519 Sly00001225 Sly00005522 Sly00005521 Sly00001222 Sly00005525 Sly00005520 Sly00001220
Solyc00g006805.1.1	Sly00006449 Sly00006450 Sly00006451 Sly00006453 Sly00006448 Sly00006452 Sly00006456 Sly00006454
Solyc00g006800.3.1	Sly00006455 Sly00001211 Sly00005513 Sly00001212
Solyc00g048510.3.1	Sly00005958 Sly00002264 Sly00005959 Sly00005960 Sly00002265
Solyc00g006820.3.1	Sly00005529 Sly00005530 Sly00005531 Sly00001232 Sly00001233 Sly00005532 Sly00005533 Sly00001234 Sly00005535 Sly00005534 Sly00001235 Sly00005539 Sly00005540 Sly00005536 Sly00005538 Sly00001236
Solyc00g142170.3.1	Sly00007117 Sly00004758 Sly00007119
Solyc00g195360.1.1	Sly00003405 Sly00003406 Sly00006241
Solyc00g144470.1.1	Sly00003073 Sly00006164 Sly00006165
Solyc00g050430.3.1	Sly00005977 Sly00002315 Sly00002307
Solyc00g052430.3.1	Sly00005985 Sly00002351
Solyc00g049520.2.1	Sly00006842 Sly00004416 Sly00004420
Solyc00g047700.3.1	Sly00004409 Sly00004411 Sly00004408 Sly00006840
Solyc00g006830.3.1	Sly00004100 Sly00004101 Sly00006458 Sly00006457
Solyc00g050130.1.1	Sly00002300 Sly00002298 Sly00002299 Sly00002301 Sly00005974 Sly00005975
Solyc00g005096.1.1	Sly00005349 Sly00005348 Sly00005350 Sly00005351 Sly00000421
Solyc00g052545.1.1	Sly00005988
Solyc00g052540.1.1	Sly00006843 Sly00006844
Solyc00g154480.2.1	Sly00003131 Sly00006181
Solyc00g157083.1.1	Sly00003152 Sly00006189
Solyc00g188857.1.1	Sly00006243 Sly00006244 Sly00003410
Solyc00g053440.3.1	Sly00002364 Sly00002365 Sly00002369
Solyc00g201160.3.1	Sly00007213 Sly00007214 Sly00007219 Sly00007217 Sly00003434 Sly00007215 Sly00005059 Sly00007218 Sly00007221 Sly00005058 Sly00007216 Sly00007224 Sly00007229 Sly00007223 Sly00003435 Sly00007225 Sly00007227 Sly00007222 Sly00007220 Sly00007228
Solyc00g006867.1.1	Sly00005565 Sly00005566 Sly00001358 Sly00005567
Solyc00g030520.3.1	Sly00006772 Sly00006775
Solyc00g020940.1.1	Sly00001877 Sly00005806 Sly00005807 Sly00001882
Solyc00g074210.2.1	Sly00006032 Sly00006033 Sly00002559 Sly00002558 Sly00187666 Sly00187664
Solyc00g075035.1.1	Sly00006914 Sly00004508 Sly00006037 Sly00006916 Sly00006038
Solyc00g020040.1.1	Sly00005791
Solyc00g019980.2.1	Sly00005792 Sly00001850 Sly00005795 Sly00005793
Solyc00g027770.3.1	Sly00005871 Sly00005872 Sly00005870 Sly00005873 Sly00002011 Sly00005874 Sly00002010 Sly00002008 Sly00005876 Sly00005877
Solyc00g026907.1.1	Sly00006751 Sly00004340 Sly00004339
Solyc00g071180.3.1	Sly00006895 Sly00006898 Sly00006905 Sly00006896 Sly00006901 Sly00006899 Sly00006900 Sly00004487 Sly00006904
Solyc00g072100.3.1	Sly00006912 Sly00004491
Solyc00g069880.2.1	Sly00002525 Sly00002522 Sly00006021 Sly00002523 Sly00002524 Sly00006020 Sly00006022 Sly00006023
Solyc00g068970.2.1	Sly00006888 Sly00006892
Solyc00g014830.3.1	Sly00006644 Sly00006645 Sly00001762 Sly00006652 Sly00001763 Sly00006647 Sly00006649 Sly00004259 Sly00006646 Sly00006650 Sly00006656 Sly00006653 Sly00006654 Sly00006655
Solyc00g014860.1.1	Sly00006658 Sly00006660
Solyc00g014790.2.1	Sly00001756 Sly00001757
Solyc00g014820.2.1	Sly00001760 Sly00001761
Solyc00g025400.2.1	Sly00006740 Sly00006741
Solyc00g024570.2.1	Sly00001944 Sly00005843 Sly00005844 Sly00001945
Solyc00g090430.2.1	Sly00002700 Sly00002701 Sly00006057 Sly00006058
Solyc00g013180.1.1	Sly00006634 Sly00004242
Solyc00g013181.1.1	Sly00006637 Sly00006638 Sly00001693
Solyc00g013186.1.1	Sly00005747 Sly00005748 Sly00005749
Solyc00g006590.2.1	Sly00006441 Sly00006442
Solyc00g023700.2.1	Sly00001932 Sly00005836 Sly00001933 Sly00005837
Solyc00g013160.2.1	Sly00001691
Solyc00g022090.2.1	Sly00006712 Sly00006714
Solyc00g084650.2.1	Sly00006933 Sly00006937 Sly00006934 Sly00006942 Sly00006938
Solyc10g039363.1.1	Sly00002666 Sly00487999 Sly00006048 Sly00508264
Solyc00g012702.1.1	Sly00005739 Sly00005740
Solyc00g006540.1.1	Sly00006426 Sly00006427
Solyc00g013140.2.1	Sly00001687 Sly00006628 Sly00004241 Sly00006629 Sly00006630 Sly00006631
Solyc00g006560.1.1	Sly00006432 Sly00006433
Solyc00g012704.1.1	Sly00006618 Sly00006617
Solyc00g012708.1.1	Sly00006620 Sly00006621
Solyc00g021640.3.1	Sly00006695 Sly00004305 Sly00006697 Sly00006698 Sly00006705 Sly00006700 Sly00006703 Sly00006699 Sly00006704 Sly00006710 Sly00006701 Sly00006708 Sly00006706 Sly00006707 Sly00006709 Sly00006711
Solyc00g022070.1.1	Sly00001898 Sly00005816
Solyc00g005000.3.1	Sly00000006 Sly00005278
Solyc00g164680.2.1	Sly00003212 Sly00006201
Solyc00g164580.1.1	Sly00003206 Sly00006200 Sly00003207
Solyc00g036320.2.1	Sly00002120 Sly00005922 Sly00005923
Solyc00g033860.2.1	Sly00006808 Sly00004366
Solyc00g030510.3.1	Sly00002057 Sly00002058
Solyc03g043580.2.1	Sly00001651 Sly00145164 Sly00005717
Solyc00g099580.2.1	Sly00006970 Sly00006969 Sly00006968
Solyc00g009100.3.1	Sly00006531 Sly00006533 Sly00004173 Sly00006534
Solyc00g231780.2.1	Sly00007244 Sly00007246
Solyc12g077420.2.1	Sly00004670 Sly00602047 Sly00582348 Sly00582349 Sly00602052 Sly00602053 Sly00602071 Sly00602072 Sly00582353 Sly00602048 Sly00602068 Sly00602069 Sly00602042 Sly00602056 Sly00602066 Sly00602045 Sly00602046 Sly00602057 Sly00004678 Sly00004676 Sly00582332 Sly00602049 Sly00602063 Sly00602059 Sly00602058 Sly00602044
Solyc00g127870.3.1	Sly00006136 Sly00006137 Sly00002963
Solyc00g217560.1.1	Sly00003513 Sly00006277
Solyc00g009060.3.1	Sly00005606 Sly00001490
Solyc00g009020.3.1	Sly00005595 Sly00001479 Sly00005598 Sly00005597 Sly00005596 Sly00001481 Sly00001480 Sly00005599
Solyc00g202560.2.1	Sly00003441 Sly00006247
Solyc00g157080.2.1	Sly00006188 Sly00003151 Sly00006190
Solyc00g029080.1.1	Sly00002024 Sly00005893
Solyc00g071600.1.1	Sly00004490
Solyc00g026160.3.1	Sly00001969 Sly00005858 Sly00005859
Solyc00g082150.3.1	Sly00006925 Sly00006927
Solyc00g080750.3.1	Sly00004531 Sly00004530
Solyc00g033880.1.1	Sly00006810 Sly00004368
Solyc00g034000.2.1	Sly00005918 Sly00002098
Solyc00g090650.1.1	Sly00004578 Sly00006953
Solyc00g212260.2.1	Sly00003490
Solyc00g005094.1.1	Sly00006375 Sly00006376 Sly00006378 Sly00006379 Sly00004029
Solyc00g145170.2.1	Sly00003079 Sly00003080 Sly00006166
Solyc00g020545.1.1	Sly00005804 Sly00001879
Solyc06g050455.1.1	Sly00006923 Sly00006922
Solyc00g019970.2.1	Sly00001849 Sly00001851
Solyc00g020540.2.1	Sly00001864 Sly00005799
Solyc00g024160.2.1	Sly00004323 Sly00006734
Solyc00g022107.1.1	Sly00006715 Sly00006713 Sly00004311 Sly00006720
Solyc00g179240.2.1	Sly00007192 Sly00007194
Solyc00g005900.2.1	Sly00006417
Solyc00g090115.1.1	Sly00006949
Solyc00g095450.1.1	Sly00004590 Sly00006964
Solyc00g009120.3.1	Sly00001522 Sly00005666 Sly00001520
Solyc00g052940.3.1	Sly00006845 Sly00006846
Solyc00g125275.1.1	Sly00007049 Sly00004709
Solyc00g060810.3.1	Sly00004462 Sly00004463
Solyc00g063510.1.1	Sly00006873 Sly00004470
Solyc00g044755.1.1	Sly00006834
Solyc00g143770.2.1	Sly00007121 Sly00007122
Solyc00g030210.2.1	Sly00002051 Sly00005900
Solyc00g029300.2.1	Sly00005894 Sly00002030
Solyc00g069883.1.1	Sly00006025
Solyc00g023020.2.1	Sly00001921 Sly00005824
Solyc00g024150.3.1	Sly00001937 Sly00005840
Solyc00g024040.1.1	Sly00004321 Sly00006732
Solyc00g012540.1.1	Sly00006610 Sly00006611
Solyc00g012640.1.1	Sly00006612 Sly00004232
Solyc00g008080.1.1	Sly00006504
Solyc00g084760.1.1	Sly00006941
Solyc00g095465.1.1	Sly00006065
Solyc00g174340.2.1	Sly00007188 Sly00007189
Solyc00g322635.1.1	Sly00003999 Sly00006364 Sly00006365
Solyc00g188855.1.1	Sly00006240
Solyc00g017880.1.1	Sly00004279 Sly00006675
Solyc00g015720.1.1	Sly00006666 Sly00004273
Solyc00g023260.1.1	Sly00004318 Sly00006726
Solyc00g023250.2.1	Sly00006725 Sly00004317
Solyc00g097960.2.1	Sly00002755 Sly00002756
Solyc00g030000.1.1	Sly00006764 Sly00006765
Solyc00g012680.1.1	Sly00004234 Sly00006614
Solyc00g185750.1.1	Sly00007203 Sly00005006
Solyc00g153680.1.1	Sly00007127 Sly00007128
Solyc03g042520.2.1	Sly00001643 Sly00145127
Solyc00g010750.2.1	Sly00006564 Sly00006565
Solyc00g017910.1.1	Sly00005779 Sly00001804
Solyc00g016900.1.1	Sly00004276 Sly00006671
Solyc00g007560.2.1	Sly00005581
Solyc00g029290.1.1	Sly00006762 Sly00004345
Solyc00g020970.1.1	Sly00004302 Sly00006689
Solyc10g079670.2.1	Sly00498029 Sly00498030 Sly00511797 Sly00511799 Sly00511795 Sly00498031
Solyc10g079690.2.1	Sly00498040 Sly00511805
Solyc10g079600.2.1	Sly00519115 Sly00519117 Sly00519119 Sly00519118 Sly00504148 Sly00504146
Solyc10g079660.2.1	Sly00511788 Sly00511790 Sly00511789 Sly00498027 Sly00498026
Solyc10g079560.1.1	Sly00519086 Sly00519088 Sly00519089 Sly00519090 Sly00519094 Sly00519096 Sly00504139 Sly00519097 Sly00519091
Solyc10g079570.2.1	Sly00498001 Sly00511778 Sly00511779 Sly00511780 Sly00498002
Solyc10g079610.2.1	Sly00511781 Sly00498009 Sly00511782
Solyc10g079510.2.1	Sly00519065 Sly00519068 Sly00519067 Sly00519070
Solyc10g079500.2.1	Sly00497990 Sly00497988 Sly00497989 Sly00497991
Solyc10g079470.3.1	Sly00519049 Sly00504121 Sly00504119 Sly00519048
Solyc10g079490.2.1	Sly00519054 Sly00519053 Sly00519064 Sly00519052
Solyc10g079755.1.1	Sly00519162 Sly00504178 Sly00511850
Solyc10g079750.2.1	Sly00519159 Sly00519161 Sly00519160
Solyc10g079740.2.1	Sly00511836 Sly00498058 Sly00511837 Sly00511838 Sly00511839 Sly00511841 Sly00511840 Sly00498057 Sly00511843
Solyc10g079730.2.1	Sly00504169 Sly00519155 Sly00519154
Solyc10g079710.2.1	Sly00511809 Sly00511807 Sly00511808 Sly00511812 Sly00498050 Sly00498054 Sly00511810 Sly00511814 Sly00498053 Sly00511811 Sly00511829 Sly00511824 Sly00511827
Solyc10g079720.2.1	Sly00504160 Sly00519132 Sly00519140 Sly00519133 Sly00519138 Sly00519143 Sly00504163 Sly00519149 Sly00519136 Sly00504161
Solyc10g006140.3.1	Sly00505886 Sly00482219 Sly00505887 Sly00505888
Solyc10g006153.1.1	Sly00500383 Sly00514029 Sly00514030 Sly00514031 Sly00514032 Sly00514033 Sly00514034 Sly00500390 Sly00500382
Solyc10g006170.3.1	Sly00514038 Sly00514041 Sly00514043 Sly00514040 Sly00500385 Sly00514042 Sly00500387 Sly00500384 Sly00500386
Solyc10g006190.3.1	Sly00514039 Sly00514047 Sly00500398 Sly00500399 Sly00514035 Sly00514061 Sly00500395 Sly00514048 Sly00514067 Sly00514058 Sly00514064 Sly00500408 Sly00514081 Sly00500394 Sly00500396 Sly00500403 Sly00500410 Sly00514046 Sly00500401 Sly00500409 Sly00500397 Sly00500405 Sly00500402 Sly00514071 Sly00500411
Solyc10g079250.2.1	Sly00504086 Sly00504088 Sly00518968 Sly00518959
Solyc10g006150.3.1	Sly00482223 Sly00482222 Sly00505890
Solyc10g006220.3.1	Sly00514085 Sly00514088 Sly00500416 Sly00514087 Sly00500415 Sly00500418 Sly00514092 Sly00514093
Solyc10g006230.3.1	Sly00482231 Sly00482233 Sly00482235 Sly00482234 Sly00482237 Sly00482236 Sly00482240 Sly00482238 Sly00482239
Solyc10g006240.3.1	Sly00500427 Sly00514099 Sly00514100 Sly00500425 Sly00514103 Sly00500424 Sly00500422 Sly00514102 Sly00514110 Sly00500423 Sly00500426 Sly00514104
Solyc10g006260.3.1	Sly00482254 Sly00505893 Sly00505892 Sly00482250 Sly00505894 Sly00505895 Sly00482251 Sly00482255 Sly00482252 Sly00482253 Sly00482258 Sly00482256 Sly00482257 Sly00482260
Solyc10g006275.1.1	Sly00505899 Sly00482265
Solyc10g079220.2.1	Sly00518955 Sly00504082
Solyc10g079240.2.1	Sly00511721 Sly00497896 Sly00511723 Sly00497897 Sly00497898 Sly00511722 Sly00497899
Solyc10g006120.2.1	Sly00514010 Sly00500323 Sly00500324 Sly00514012
Solyc10g006130.1.1	Sly00514022 Sly00514028 Sly00500334
Solyc10g079260.2.1	Sly00511724 Sly00511725 Sly00511726 Sly00497901 Sly00511727 Sly00497900 Sly00511729
Solyc10g079170.2.1	Sly00497882 Sly00518943 Sly00518944 Sly00504067
Solyc10g006080.2.1	Sly00482193 Sly00482196
Solyc10g006090.3.1	Sly00505853 Sly00505852 Sly00505854 Sly00505856 Sly00505859 Sly00505864 Sly00482204 Sly00505858 Sly00482200 Sly00505861 Sly00505862 Sly00482201 Sly00482207 Sly00482205 Sly00482203 Sly00505876 Sly00505881 Sly00505875
Solyc10g079150.2.1	Sly00497877 Sly00518925 Sly00518926 Sly00518927 Sly00518929 Sly00518932 Sly00518930 Sly00518928 Sly00518942 Sly00497876 Sly00518939 Sly00518935 Sly00518936
Solyc10g079110.2.1	Sly00518888 Sly00518889 Sly00518890 Sly00518891 Sly00518895 Sly00518897 Sly00518898 Sly00518896 Sly00518899 Sly00518894
Solyc10g079070.2.1	Sly00497814 Sly00497815 Sly00511693 Sly00511696 Sly00518877 Sly00518878 Sly00518879 Sly00497816 Sly00511694 Sly00511695 Sly00511703 Sly00511702
Solyc10g079130.2.1	Sly00518921 Sly00518922 Sly00518919 Sly00518920 Sly00504059 Sly00504057 Sly00504058 Sly00518924 Sly00518923
Solyc10g079120.2.1	Sly00518901 Sly00504046 Sly00518903 Sly00518902 Sly00518906 Sly00518907 Sly00504045 Sly00518904 Sly00518908 Sly00518905 Sly00504047 Sly00518909 Sly00518910 Sly00518918
Solyc10g006270.3.1	Sly00514112 Sly00500430 Sly00514113
Solyc10g079480.1.1	Sly00497981 Sly00511772 Sly00504132 Sly00497982 Sly00497983
Solyc10g079450.2.1	Sly00497963 Sly00511764 Sly00511766 Sly00511765 Sly00497965
Solyc10g079430.2.1	Sly00511759 Sly00497958 Sly00511762 Sly00497960
Solyc10g079440.2.1	Sly00519040 Sly00519042 Sly00497959 Sly00519043 Sly00519041
Solyc10g079410.2.1	Sly00497946 Sly00497945
Solyc10g079405.1.1	Sly00504114 Sly00519032 Sly00519036 Sly00519037
Solyc10g079370.2.1	Sly00519023 Sly00519024 Sly00504107 Sly00504106 Sly00504108 Sly00504109 Sly00519028 Sly00504110 Sly00519027 Sly00519026
Solyc10g079350.2.1	Sly00518981 Sly00518984 Sly00518987 Sly00518998 Sly00519013 Sly00518988 Sly00518985 Sly00518986 Sly00518990 Sly00518996 Sly00518991 Sly00518992 Sly00518993 Sly00518999 Sly00519000 Sly00518995 Sly00518994 Sly00519003 Sly00518997 Sly00519004 Sly00519002 Sly00519001 Sly00519011 Sly00519018 Sly00519010 Sly00519012
Solyc10g079340.2.1	Sly00504100
Solyc10g079300.2.1	Sly00518976 Sly00518978 Sly00504097 Sly00518977
Solyc10g079310.2.1	Sly00511745 Sly00511748 Sly00497910 Sly00511746 Sly00511747 Sly00497911 Sly00497914
Solyc10g079280.2.1	Sly00511738 Sly00511737 Sly00497905 Sly00511740 Sly00497906 Sly00511741 Sly00497907
Solyc10g005530.3.1	Sly00513777 Sly00513781 Sly00500230 Sly00513787 Sly00513786
Solyc10g005550.2.1	Sly00513791 Sly00500234
Solyc10g005520.3.1	Sly00513774 Sly00513775 Sly00513776
Solyc10g005580.3.1	Sly00513793 Sly00513794 Sly00500242 Sly00500241 Sly00513799 Sly00513796 Sly00513795
Solyc10g045500.2.1	Sly00490970 Sly00490969 Sly00490971 Sly00490972 Sly00516676 Sly00502344 Sly00490973 Sly00516677
Solyc10g005590.3.1	Sly00513800 Sly00513801 Sly00513802 Sly00513803 Sly00513804 Sly00513809 Sly00513813 Sly00513806 Sly00513811 Sly00513810 Sly00513814 Sly00500247 Sly00513812
Solyc10g005620.3.1	Sly00500261 Sly00513851 Sly00513853 Sly00513858 Sly00513859 Sly00513857 Sly00513860 Sly00513861
Solyc10g005600.3.1	Sly00513817 Sly00513818 Sly00513820 Sly00513822 Sly00513841 Sly00500259 Sly00513819 Sly00513821 Sly00513823 Sly00500258 Sly00500255 Sly00513826 Sly00513832 Sly00513835 Sly00500252 Sly00513838 Sly00513824 Sly00513836 Sly00500257 Sly00513833 Sly00513840 Sly00513831 Sly00513829 Sly00513830 Sly00513844 Sly00513849 Sly00513842 Sly00500256 Sly00513843 Sly00513839 Sly00513847 Sly00513845
Solyc10g005630.3.1	Sly00482060 Sly00482056 Sly00482057 Sly00505675 Sly00505670 Sly00482063 Sly00482064 Sly00482061
Solyc10g005640.3.1	Sly00505671 Sly00505672 Sly00505682 Sly00505679 Sly00482069
Solyc10g038030.2.1	Sly00508115 Sly00508116
Solyc10g005670.2.1	Sly00500263 Sly00513870 Sly00513873
Solyc10g038060.2.1	Sly00508122 Sly00508124 Sly00487425 Sly00508123
Solyc10g038080.2.1	Sly00516126 Sly00516127 Sly00501734
Solyc10g045457.1.1	Sly00502333 Sly00516670 Sly00516671
Solyc10g005690.3.1	Sly00513877 Sly00513875 Sly00500265 Sly00513882 Sly00513881 Sly00513878 Sly00513885 Sly00513883 Sly00513880
Solyc10g005700.3.1	Sly00505687 Sly00482081 Sly00482082 Sly00482083
Solyc10g005720.1.1	Sly00505691 Sly00505693 Sly00505695 Sly00505696 Sly00482086 Sly00482087
Solyc10g005740.2.1	Sly00513897 Sly00500270 Sly00500269 Sly00513898 Sly00513901 Sly00513900
Solyc10g037990.1.1	Sly00516103 Sly00516102
Solyc10g037980.2.1	Sly00487289 Sly00487288 Sly00487290 Sly00487292 Sly00487291 Sly00508090 Sly00508091
Solyc10g005820.2.1	Sly00505712 Sly00482106 Sly00505714 Sly00505717 Sly00505713
Solyc10g005840.3.1	Sly00505720 Sly00505725 Sly00505733 Sly00482119 Sly00482118 Sly00505731 Sly00505723 Sly00505721 Sly00505726 Sly00482114 Sly00505736 Sly00505722 Sly00505735 Sly00482125 Sly00482122 Sly00505737 Sly00482124 Sly00482111 Sly00482117 Sly00482115 Sly00482121
Solyc10g005770.3.1	Sly00513912 Sly00513914 Sly00513918 Sly00513926 Sly00513915 Sly00513917 Sly00513920 Sly00513919 Sly00513913 Sly00500272 Sly00500275 Sly00500273 Sly00513923 Sly00513932 Sly00513930
Solyc10g005780.3.1	Sly00500276 Sly00513936
Solyc10g005790.3.1	Sly00482102 Sly00482101 Sly00482099 Sly00505708 Sly00482100
Solyc10g045585.1.1	Sly00509208 Sly00491152
Solyc10g038000.2.1	Sly00508096 Sly00487316 Sly00487321 Sly00487323 Sly00487318 Sly00508097 Sly00487317 Sly00487322 Sly00487319 Sly00508098 Sly00508100
Solyc10g045620.2.1	Sly00516693 Sly00516694 Sly00516699 Sly00516696 Sly00516702 Sly00516695 Sly00516705
Solyc10g045600.2.1	Sly00491161 Sly00491158 Sly00491159 Sly00491162 Sly00509210
Solyc10g005910.2.1	Sly00513966 Sly00513970
Solyc10g005900.3.1	Sly00505758 Sly00505763 Sly00505773 Sly00482141 Sly00505762 Sly00482144 Sly00505767 Sly00505774 Sly00505761 Sly00505771 Sly00505765 Sly00482143 Sly00482142
Solyc10g005890.3.1	Sly00513960 Sly00513962 Sly00500286 Sly00513963
Solyc10g005880.3.1	Sly00505751 Sly00505752 Sly00505756 Sly00482135 Sly00482137 Sly00482139 Sly00482136 Sly00505754
Solyc10g005870.3.1	Sly00482126 Sly00505744 Sly00482127 Sly00505745 Sly00505742 Sly00482129 Sly00505746
Solyc10g005850.3.1	Sly00513939 Sly00513941 Sly00513944 Sly00513940 Sly00513946 Sly00513948 Sly00513945 Sly00513947 Sly00513943 Sly00513949 Sly00513952 Sly00500282
Solyc10g037940.1.1	Sly00501717 Sly00516090 Sly00516089
Solyc10g005920.3.1	Sly00505780 Sly00505781 Sly00505782 Sly00505783 Sly00505794 Sly00505793 Sly00505807 Sly00505778 Sly00505787 Sly00505791 Sly00505779 Sly00505806 Sly00505790 Sly00505795 Sly00505784 Sly00505800 Sly00505802 Sly00505801 Sly00505804 Sly00482151 Sly00482149 Sly00505805 Sly00505788
Solyc10g005925.1.1	Sly00505810 Sly00505822 Sly00505823
Solyc10g005960.1.1	Sly00513975 Sly00513976 Sly00513978 Sly00513979 Sly00513977
Solyc10g045560.2.1	Sly00491109 Sly00491108 Sly00509199
Solyc10g045550.2.1	Sly00491105 Sly00509196 Sly00509195 Sly00491106
Solyc10g006070.3.1	Sly00482186 Sly00482188 Sly00482187 Sly00482190
Solyc10g006100.3.1	Sly00513997 Sly00513998 Sly00514001 Sly00514002 Sly00500318
Solyc10g006000.3.1	Sly00500314 Sly00513984 Sly00513988 Sly00513987 Sly00513991 Sly00513992 Sly00513995
Solyc10g005990.3.1	Sly00513981 Sly00500312 Sly00500313 Sly00513982 Sly00513983
Solyc10g006050.3.1	Sly00505845 Sly00505844 Sly00482184
Solyc10g005950.3.1	Sly00505824 Sly00482153 Sly00505825 Sly00505826 Sly00505829 Sly00482155 Sly00482158 Sly00505832 Sly00505827 Sly00482154 Sly00482156 Sly00505834 Sly00482159 Sly00505833
Solyc10g006020.3.1	Sly00505835 Sly00505840 Sly00482167
Solyc10g037890.2.1	Sly00516056 Sly00516057 Sly00516072 Sly00487179 Sly00516062 Sly00516059 Sly00516063 Sly00508059 Sly00516058 Sly00516064 Sly00516068 Sly00516074 Sly00516069 Sly00516075 Sly00508060 Sly00516060
Solyc10g037897.1.1	Sly00508061 Sly00508062
Solyc10g037910.2.1	Sly00487181 Sly00508066 Sly00508067
Solyc10g045775.1.1	Sly00509243 Sly00509244 Sly00509245 Sly00509246
Solyc10g037960.2.1	Sly00487223 Sly00508074 Sly00508078
Solyc10g046770.2.1	Sly00509248 Sly00509249 Sly00509250 Sly00509252 Sly00509256 Sly00491301 Sly00509254 Sly00509251 Sly00509263 Sly00509255 Sly00491293 Sly00509260 Sly00491308 Sly00491302 Sly00509253 Sly00509262 Sly00509267 Sly00509266 Sly00491296 Sly00491294 Sly00509268 Sly00509264 Sly00491295 Sly00491303 Sly00509269 Sly00491298 Sly00509285 Sly00509259 Sly00509286 Sly00509283 Sly00491297 Sly00509273
Solyc10g005130.3.1	Sly00505600 Sly00505601 Sly00481975 Sly00505608 Sly00505606 Sly00481971 Sly00505605 Sly00505609 Sly00505602 Sly00505613 Sly00481973 Sly00505603 Sly00505611 Sly00505617 Sly00481972 Sly00505607 Sly00505614 Sly00505615
Solyc10g046820.2.1	Sly00509294 Sly00509295
Solyc10g005230.3.1	Sly00481991 Sly00505628
Solyc10g005180.3.1	Sly00505621 Sly00481980 Sly00505623 Sly00505622 Sly00505624
Solyc10g005190.1.1	Sly00481983 Sly00505626
Solyc10g005210.3.1	Sly00513617 Sly00513619 Sly00513618 Sly00500168
Solyc10g005220.3.1	Sly00513621 Sly00513622
Solyc10g005260.3.1	Sly00513624 Sly00513625 Sly00513631 Sly00513632 Sly00513633 Sly00500179 Sly00513626 Sly00513636 Sly00513634 Sly00500177 Sly00513642 Sly00513643 Sly00481997 Sly00513638 Sly00513627 Sly00513637 Sly00500178 Sly00513629
Solyc10g045725.1.1	Sly00516712
Solyc10g005340.3.1	Sly00500191 Sly00513669 Sly00513670 Sly00513673 Sly00513674 Sly00500192 Sly00513672 Sly00513675 Sly00513676
Solyc10g005320.3.1	Sly00482005 Sly00505638 Sly00505642 Sly00505640 Sly00505639 Sly00505643
Solyc10g005330.3.1	Sly00513658 Sly00500188 Sly00513664 Sly00513665 Sly00500189 Sly00500187 Sly00500190 Sly00513660 Sly00513666 Sly00513661 Sly00513662 Sly00513663 Sly00513659
Solyc10g005310.3.1	Sly00513649 Sly00513650 Sly00513653 Sly00513654 Sly00513656
Solyc10g005300.3.1	Sly00482002 Sly00505637
Solyc10g005250.3.1	Sly00481995 Sly00500175
Solyc10g005370.3.1	Sly00482017 Sly00482018 Sly00505647 Sly00505648 Sly00482019 Sly00505646 Sly00482021
Solyc10g005380.3.1	Sly00513687 Sly00513688 Sly00513689 Sly00513691
Solyc10g005360.3.1	Sly00500194 Sly00500193
Solyc10g005450.2.1	Sly00505651 Sly00505653 Sly00482038 Sly00505654 Sly00505655 Sly00505660 Sly00505652 Sly00505658
Solyc10g005440.2.1	Sly00513711 Sly00513712 Sly00513713
Solyc10g005410.3.1	Sly00513701 Sly00513702 Sly00513706 Sly00500200
Solyc10g005390.3.1	Sly00482027 Sly00505649 Sly00505650
Solyc10g005430.3.1	Sly00513709 Sly00513710
Solyc10g005480.3.1	Sly00500205 Sly00513719 Sly00513720 Sly00513718 Sly00513723 Sly00513724 Sly00513722 Sly00513721
Solyc10g005490.3.1	Sly00513728 Sly00513729 Sly00513732 Sly00513746 Sly00513749 Sly00513733 Sly00513734 Sly00513738 Sly00513743 Sly00513737 Sly00500206 Sly00513750 Sly00513730 Sly00513735 Sly00513742 Sly00513745 Sly00500210 Sly00513739 Sly00513741 Sly00500211
Solyc10g005500.3.1	Sly00513754 Sly00513755 Sly00513756 Sly00513757 Sly00513762 Sly00513764 Sly00513761 Sly00513759 Sly00513763 Sly00513760 Sly00513758 Sly00500217 Sly00513766
Solyc10g005510.3.1	Sly00513767 Sly00500220 Sly00513769 Sly00513771 Sly00513768 Sly00513773 Sly00513772
Solyc10g006510.3.1	Sly00500556 Sly00514152
Solyc10g006440.3.1	Sly00482311 Sly00482307 Sly00482308 Sly00505976 Sly00505973 Sly00505977 Sly00505981 Sly00505980 Sly00505978
Solyc10g006410.3.1	Sly00505946 Sly00482298 Sly00505947 Sly00482297 Sly00482296 Sly00505948 Sly00505958
Solyc10g006430.2.1	Sly00505966 Sly00505967 Sly00482305 Sly00505968
Solyc10g006460.3.1	Sly00482312 Sly00505986 Sly00505985 Sly00505988 Sly00482313 Sly00505987 Sly00505989
Solyc10g006470.3.1	Sly00514147 Sly00514146 Sly00514149 Sly00500449
Solyc10g006480.2.1	Sly00500454 Sly00482315 Sly00514150 Sly00500487 Sly00482316
Solyc10g046930.2.1	Sly00502410 Sly00516726 Sly00516728 Sly00516729 Sly00516725 Sly00516732 Sly00516730 Sly00516727 Sly00516735
Solyc10g006300.3.1	Sly00505901 Sly00482268 Sly00505908 Sly00482269 Sly00505907 Sly00482270 Sly00505915
Solyc10g006290.3.1	Sly00505905 Sly00505902 Sly00505900 Sly00505906 Sly00505903 Sly00505904 Sly00505910
Solyc10g006320.3.1	Sly00514114 Sly00500433 Sly00514115
Solyc10g006330.3.1	Sly00505927 Sly00482284 Sly00505928
Solyc10g006360.2.1	Sly00505932 Sly00505933 Sly00505934 Sly00505936 Sly00482288 Sly00482289 Sly00505937 Sly00505935 Sly00482290
Solyc10g006350.3.1	Sly00500435 Sly00514122 Sly00514120 Sly00514124 Sly00514123
Solyc10g006390.3.1	Sly00514127 Sly00514128 Sly00514129 Sly00514130 Sly00514132 Sly00500444 Sly00514133 Sly00514126 Sly00500440 Sly00500445 Sly00514134 Sly00514135 Sly00514136 Sly00500441
Solyc10g047030.3.1	Sly00509340 Sly00509343 Sly00509345 Sly00509341 Sly00509342 Sly00491542 Sly00491543 Sly00509346
Solyc10g047040.3.1	Sly00491551 Sly00509348 Sly00491548 Sly00509351 Sly00509349 Sly00509350 Sly00491547 Sly00509352 Sly00491556
Solyc10g047050.2.1	Sly00509363 Sly00509362 Sly00491563 Sly00509364 Sly00509368 Sly00509366 Sly00491564 Sly00509367
Solyc10g046970.2.1	Sly00516740 Sly00516742 Sly00516744 Sly00516747 Sly00502425 Sly00516741 Sly00516746 Sly00502424 Sly00502426 Sly00502428 Sly00516748 Sly00502430
Solyc10g047130.2.1	Sly00509394 Sly00509395 Sly00509396 Sly00509398 Sly00509406 Sly00509399 Sly00509401 Sly00509400 Sly00509407 Sly00509402 Sly00509397
Solyc10g047083.1.1	Sly00516761 Sly00516762
Solyc10g047085.1.1	Sly00516763 Sly00516764 Sly00516766
Solyc10g047110.2.1	Sly00516771 Sly00516773 Sly00516774 Sly00516775 Sly00516772 Sly00502445
Solyc10g047140.2.1	Sly00516787 Sly00502453 Sly00516788 Sly00516789 Sly00516796 Sly00502452 Sly00516794 Sly00502451 Sly00516795
Solyc10g047170.2.1	Sly00516826 Sly00516827 Sly00502461 Sly00502463 Sly00516830 Sly00516829
Solyc10g047120.2.1	Sly00516782 Sly00516779 Sly00516783 Sly00502447
Solyc10g079900.2.1	Sly00519178 Sly00519181 Sly00504206
Solyc10g079910.2.1	Sly00498118 Sly00498119 Sly00498120 Sly00511893 Sly00511891
Solyc10g079930.1.1	Sly00498125 Sly00519186 Sly00519196 Sly00511898 Sly00519189 Sly00504212
Solyc10g080020.2.1	Sly00511906 Sly00511907 Sly00498155 Sly00511911 Sly00498154 Sly00511914 Sly00511917 Sly00498147 Sly00511909 Sly00498148 Sly00498151 Sly00498146 Sly00498153 Sly00498156 Sly00511918
Solyc10g079950.2.1	Sly00519191 Sly00519192 Sly00504231 Sly00504233 Sly00504234 Sly00504237 Sly00519199 Sly00519202 Sly00504235 Sly00519201 Sly00519197 Sly00504236 Sly00504238 Sly00519190 Sly00519207 Sly00519204 Sly00504241 Sly00519203 Sly00519205 Sly00504210
Solyc10g080010.2.1	Sly00498143 Sly00511905 Sly00498144
Solyc10g080070.2.1	Sly00504251 Sly00511930 Sly00511934 Sly00511935 Sly00511933 Sly00504256 Sly00511929 Sly00498165 Sly00511926
Solyc10g080090.2.1	Sly00519254 Sly00504258 Sly00519255 Sly00519258 Sly00504257 Sly00519259 Sly00504264
Solyc10g080045.1.1	Sly00519241 Sly00504248 Sly00519240 Sly00519243
Solyc10g079990.2.1	Sly00519215 Sly00519216 Sly00519218 Sly00519220 Sly00519221 Sly00519227 Sly00519219 Sly00519232 Sly00519226 Sly00519228 Sly00519223 Sly00519234 Sly00519233 Sly00519235 Sly00519236 Sly00519237
Solyc10g080030.2.1	Sly00498158 Sly00511921 Sly00498159
Solyc10g080130.2.1	Sly00498171 Sly00511939 Sly00511943 Sly00511945 Sly00511946 Sly00511940 Sly00498176 Sly00498177 Sly00498172 Sly00498175 Sly00511948 Sly00498173 Sly00511956
Solyc10g080115.1.1	Sly00519319 Sly00519323
Solyc10g080110.2.1	Sly00519322 Sly00519324 Sly00504267 Sly00519320 Sly00504268 Sly00519326 Sly00519325 Sly00504270
Solyc10g080100.2.1	Sly00519268 Sly00519270 Sly00519273 Sly00519283 Sly00519312 Sly00519264 Sly00519266 Sly00519267 Sly00519284 Sly00519288 Sly00519265 Sly00519290 Sly00519304 Sly00519282 Sly00519311 Sly00519272 Sly00519271 Sly00519274 Sly00519296 Sly00519314 Sly00519275 Sly00519269 Sly00519310 Sly00504265
Solyc10g080150.2.1	Sly00519329 Sly00519330 Sly00519331 Sly00519335 Sly00519337 Sly00519347 Sly00519343 Sly00519341 Sly00519339 Sly00519333 Sly00519338
Solyc10g080160.2.1	Sly00519351 Sly00519352
Solyc10g080180.2.1	Sly00504274 Sly00519354 Sly00519358 Sly00519360 Sly00519359 Sly00519361 Sly00519355
Solyc10g080200.2.1	Sly00504276 Sly00519371 Sly00519374
Solyc10g080190.1.1	Sly00519364 Sly00504275 Sly00504277 Sly00519365 Sly00519366 Sly00504278 Sly00519367
Solyc10g080230.2.1	Sly00498207 Sly00498206 Sly00511967 Sly00511966 Sly00511968
Solyc10g080260.2.1	Sly00498213 Sly00511969 Sly00511982 Sly00511986 Sly00511983 Sly00511990 Sly00511992 Sly00511993 Sly00511974 Sly00511977 Sly00511978 Sly00511972 Sly00511991 Sly00511989 Sly00511971 Sly00511979 Sly00511988 Sly00511976 Sly00511995 Sly00511987 Sly00511994 Sly00511997 Sly00511998 Sly00512000 Sly00511999 Sly00511996 Sly00511985 Sly00512001 Sly00511980 Sly00512002 Sly00511984 Sly00511981
Solyc10g080280.2.1	Sly00512003 Sly00512004 Sly00512005 Sly00498224 Sly00512006 Sly00512007 Sly00512009 Sly00512013 Sly00498221 Sly00498226 Sly00498230 Sly00512010 Sly00512031 Sly00498223 Sly00498236 Sly00512008 Sly00498219 Sly00498237 Sly00512022 Sly00512019 Sly00512025 Sly00512026 Sly00512021 Sly00498231 Sly00512035 Sly00498222 Sly00498235 Sly00512029
Solyc10g080350.2.1	Sly00504342 Sly00519442 Sly00512038 Sly00504343 Sly00504353 Sly00498241 Sly00498242
Solyc10g080320.2.1	Sly00519379 Sly00519389 Sly00519402 Sly00519409 Sly00519382 Sly00519397 Sly00504320 Sly00504317 Sly00519403 Sly00519405 Sly00519388 Sly00519396 Sly00519416 Sly00519380 Sly00519387 Sly00519385 Sly00504322 Sly00519384 Sly00519381 Sly00519414 Sly00519417 Sly00519392
Solyc10g080330.2.1	Sly00519383 Sly00519399 Sly00504329 Sly00504326 Sly00504331 Sly00504332 Sly00504338
Solyc10g080340.2.1	Sly00504340 Sly00519421 Sly00519424 Sly00519425 Sly00519422 Sly00519427 Sly00519426
Solyc10g080390.2.1	Sly00519444 Sly00519445 Sly00519447 Sly00519450 Sly00519464 Sly00519460 Sly00519446 Sly00519451 Sly00519454 Sly00519453 Sly00519465 Sly00519452 Sly00519458 Sly00519456 Sly00519457 Sly00519468 Sly00519467
Solyc10g080395.1.1	Sly00512046 Sly00512048 Sly00498255 Sly00512052 Sly00498253 Sly00512055 Sly00512045 Sly00498258 Sly00512057 Sly00512056 Sly00512061 Sly00512051
Solyc10g080397.1.1	Sly00512062
Solyc10g080393.1.1	Sly00512043 Sly00512044
Solyc10g080410.2.1	Sly00504375 Sly00519471 Sly00504374 Sly00519470 Sly00519469 Sly00519475
Solyc10g080420.2.1	Sly00498270 Sly00498269 Sly00498271
Solyc10g079850.2.1	Sly00504186 Sly00519172 Sly00519173 Sly00504185
Solyc10g079770.2.1	Sly00519163 Sly00519165 Sly00519167 Sly00519166 Sly00519168 Sly00519169 Sly00519170 Sly00519164
Solyc10g079830.2.1	Sly00498091 Sly00511873 Sly00498095 Sly00511874 Sly00511875 Sly00511872 Sly00498092 Sly00511876 Sly00511878 Sly00498093 Sly00511877
Solyc10g079820.2.1	Sly00498087 Sly00511860 Sly00511861 Sly00511863 Sly00511864 Sly00498088 Sly00511862 Sly00511866 Sly00498089 Sly00511865 Sly00511867 Sly00511868 Sly00511871 Sly00511870
Solyc10g078650.2.1	Sly00518751 Sly00518752 Sly00518753 Sly00503953
Solyc10g078590.2.1	Sly00503910 Sly00518726 Sly00518727 Sly00518728 Sly00518729 Sly00518730 Sly00503911 Sly00503912
Solyc10g078600.2.1	Sly00518733 Sly00518735 Sly00518738 Sly00518736
Solyc10g078560.3.1	Sly00518711 Sly00518719 Sly00518717 Sly00518718 Sly00503906
Solyc10g078540.2.1	Sly00497667 Sly00511630 Sly00497668 Sly00511626 Sly00511627 Sly00511628 Sly00511629 Sly00511631 Sly00511633 Sly00511632 Sly00497669
Solyc10g078480.2.1	Sly00518676 Sly00518678 Sly00518679 Sly00518680 Sly00518684 Sly00503878 Sly00518685 Sly00518687 Sly00503880 Sly00503882 Sly00518694 Sly00518692 Sly00518681 Sly00503883 Sly00503881 Sly00518683 Sly00503877
Solyc10g078490.2.1	Sly00518696 Sly00518698
Solyc10g078510.2.1	Sly00511607 Sly00511609 Sly00511610 Sly00511614 Sly00511616 Sly00511618 Sly00511611 Sly00511608 Sly00497649 Sly00511620
Solyc10g078460.2.1	Sly00497634 Sly00511603 Sly00511602
Solyc10g078470.2.1	Sly00518673 Sly00503874 Sly00518674
Solyc10g078360.2.1	Sly00518648 Sly00518647 Sly00503862
Solyc10g078410.2.1	Sly00518651 Sly00518652 Sly00503865
Solyc10g078400.2.1	Sly00511582 Sly00497615 Sly00511583 Sly00497614 Sly00511584 Sly00497609 Sly00497611 Sly00511585 Sly00497612 Sly00497610 Sly00497613
Solyc10g078420.2.1	Sly00503869 Sly00518653 Sly00518654 Sly00518657 Sly00503867 Sly00518655 Sly00518656 Sly00503868 Sly00518660 Sly00518661
Solyc10g078350.2.1	Sly00511564 Sly00511563 Sly00511568 Sly00497580
Solyc10g078340.2.1	Sly00518628 Sly00518632 Sly00518629 Sly00518631 Sly00518644 Sly00503859 Sly00518643 Sly00503860
Solyc10g078390.2.1	Sly00511573 Sly00497596 Sly00497607 Sly00511575 Sly00511576 Sly00511580 Sly00511574
Solyc10g078370.2.1	Sly00511570 Sly00497587 Sly00511571 Sly00511572
Solyc10g078290.2.1	Sly00518597 Sly00518598 Sly00503833 Sly00503835
Solyc10g078310.2.1	Sly00518600 Sly00518601 Sly00518602
Solyc10g078280.3.1	Sly00511554 Sly00497560 Sly00497559
Solyc10g078300.2.1	Sly00511557 Sly00511558 Sly00511556 Sly00497568 Sly00511560 Sly00511555 Sly00497569 Sly00511559 Sly00511561
Solyc10g078320.2.1	Sly00503854 Sly00503853 Sly00518609 Sly00518605 Sly00518608 Sly00518611 Sly00518606
Solyc10g078330.2.1	Sly00518623 Sly00503857 Sly00518626
Solyc10g078265.1.1	Sly00518583 Sly00518584 Sly00518590 Sly00518586 Sly00518585 Sly00503826 Sly00518587 Sly00518589
Solyc10g078230.2.1	Sly00518577 Sly00503817 Sly00503818
Solyc10g078180.2.1	Sly00511529 Sly00511531 Sly00511532 Sly00511537 Sly00511530 Sly00511539 Sly00511533 Sly00497535 Sly00511534 Sly00511538 Sly00511536 Sly00511547 Sly00511552 Sly00511542 Sly00497543
Solyc10g077130.1.1	Sly00497485 Sly00511511
Solyc10g078170.2.1	Sly00518570 Sly00503811 Sly00518572 Sly00518571 Sly00503810
Solyc10g078150.2.1	Sly00511513 Sly00511512 Sly00497515 Sly00511514 Sly00497514 Sly00511515 Sly00497516
Solyc10g078160.2.1	Sly00497517 Sly00497520 Sly00497521 Sly00497522 Sly00497519 Sly00511517 Sly00497518
Solyc10g077090.2.1	Sly00503801 Sly00518559 Sly00518561 Sly00497355 Sly00497356 Sly00518562 Sly00518564 Sly00518565 Sly00518560 Sly00503800 Sly00503799
Solyc10g077110.1.1	Sly00511491 Sly00497358 Sly00497357 Sly00511498 Sly00511502 Sly00511494 Sly00511509 Sly00511492 Sly00511493 Sly00497359 Sly00511496 Sly00511495 Sly00511500 Sly00497361 Sly00497363 Sly00497364 Sly00497366 Sly00511510 Sly00497367 Sly00511497
Solyc10g077080.2.1	Sly00511484 Sly00511481 Sly00511483 Sly00511487 Sly00497352 Sly00497353
Solyc10g077070.2.1	Sly00518551 Sly00518553 Sly00503797 Sly00518556
Solyc10g077000.2.1	Sly00511468 Sly00511469 Sly00497336 Sly00511472 Sly00497333 Sly00511471 Sly00511470 Sly00497339
Solyc10g077020.2.1	Sly00497345
Solyc10g077030.2.1	Sly00518535 Sly00518534 Sly00518537 Sly00503744 Sly00518538 Sly00497346 Sly00518536 Sly00497344 Sly00503748 Sly00503745
Solyc10g076990.2.1	Sly00511443 Sly00511444 Sly00511445 Sly00511448 Sly00511452 Sly00511453 Sly00511456 Sly00497330 Sly00497322 Sly00511447 Sly00497323 Sly00511459 Sly00511455 Sly00511449 Sly00511460 Sly00511458 Sly00497331 Sly00511464
Solyc10g076860.2.1	Sly00511383 Sly00511385 Sly00511384 Sly00511387 Sly00497288 Sly00511389 Sly00511394 Sly00497290 Sly00497293 Sly00511403 Sly00511395 Sly00497287 Sly00511392
Solyc10g076870.2.1	Sly00503731 Sly00518490 Sly00518497 Sly00518491 Sly00518493 Sly00503730 Sly00518498 Sly00518494 Sly00518499 Sly00518503
Solyc10g076890.2.1	Sly00511410 Sly00511418 Sly00511412 Sly00511415 Sly00511417 Sly00511416 Sly00511419 Sly00497302 Sly00511425 Sly00511413 Sly00511422 Sly00511423
Solyc10g076910.2.1	Sly00518505 Sly00518510 Sly00518514 Sly00518507 Sly00518508 Sly00503733 Sly00518511 Sly00518506 Sly00518512
Solyc10g076900.2.1	Sly00497304 Sly00497306 Sly00511429
Solyc10g076920.2.1	Sly00511432 Sly00497312 Sly00511433 Sly00497310 Sly00497308 Sly00497313 Sly00511434 Sly00497309 Sly00518515 Sly00511435 Sly00497311
Solyc10g076930.2.1	Sly00503734 Sly00503736 Sly00503735
Solyc10g076940.2.1	Sly00518519 Sly00518518 Sly00518522 Sly00518520 Sly00518521 Sly00518530 Sly00518528 Sly00518523
Solyc10g076740.2.1	Sly00518452 Sly00518453 Sly00518454 Sly00518455 Sly00503710 Sly00518459 Sly00503708 Sly00518458 Sly00518456 Sly00503707 Sly00518461 Sly00518457 Sly00503705
Solyc10g076760.2.1	Sly00511371 Sly00511373 Sly00511374 Sly00497254 Sly00511372 Sly00497252 Sly00497256 Sly00511375 Sly00497257 Sly00497258
Solyc10g076750.2.1	Sly00511367 Sly00497245 Sly00511368 Sly00497246 Sly00511366
Solyc10g076780.1.1	Sly00497267 Sly00511377 Sly00511378
Solyc10g076790.2.1	Sly00518464 Sly00503712 Sly00518465 Sly00503713 Sly00518467
Solyc10g076845.1.1	Sly00518485 Sly00503728
Solyc10g076830.2.1	Sly00518478 Sly00518479
Solyc10g007340.3.1	Sly00482574 Sly00506258 Sly00506259 Sly00482576 Sly00506260 Sly00506257 Sly00506261 Sly00482577
Solyc10g007300.2.1	Sly00506245 Sly00506246 Sly00506248 Sly00506249 Sly00506250 Sly00482560 Sly00506247 Sly00506251 Sly00506252
Solyc10g007420.4.1	Sly00514630 Sly00514631 Sly00514629 Sly00514632 Sly00514635 Sly00514634 Sly00514633
Solyc10g007410.3.1	Sly00514605 Sly00500791 Sly00514606 Sly00514607 Sly00514608 Sly00514610 Sly00500792 Sly00500790 Sly00514612 Sly00514613 Sly00514618 Sly00514620 Sly00514621 Sly00514623 Sly00514616
Solyc10g007400.3.1	Sly00514595 Sly00500789 Sly00514596 Sly00514600 Sly00514602 Sly00514597
Solyc10g007390.3.1	Sly00514592 Sly00514593 Sly00500788
Solyc10g007370.2.1	Sly00514456 Sly00514568 Sly00514583
Solyc10g007090.3.1	Sly00514464 Sly00514465
Solyc10g007100.3.1	Sly00514468 Sly00514471 Sly00500711 Sly00514472 Sly00514473 Sly00514470
Solyc10g007103.1.1	Sly00514479 Sly00514480
Solyc10g007107.1.1	Sly00514483 Sly00514484 Sly00514485 Sly00514486 Sly00514487 Sly00514488
Solyc10g007130.3.1	Sly00514502 Sly00514503 Sly00514505 Sly00514514 Sly00514515 Sly00514517 Sly00514516
Solyc10g007156.1.1	Sly00514520 Sly00514522 Sly00514521 Sly00514523
Solyc10g007170.2.1	Sly00500717 Sly00514526 Sly00500716
Solyc10g007280.3.1	Sly00514540 Sly00514541 Sly00500740 Sly00500741
Solyc10g007290.3.1	Sly00514542 Sly00514548 Sly00514543 Sly00514547 Sly00514546 Sly00514552 Sly00514551 Sly00514549 Sly00514550 Sly00514553
Solyc10g007320.3.1	Sly00514554 Sly00514555 Sly00514557 Sly00514556 Sly00500764 Sly00514558 Sly00514560
Solyc10g007330.1.1	Sly00514561 Sly00514563 Sly00514564
Solyc10g007360.3.1	Sly00514571 Sly00514573 Sly00514575 Sly00514569 Sly00514576 Sly00500776 Sly00500778 Sly00500777 Sly00500780 Sly00500779 Sly00500781 Sly00500783 Sly00514574 Sly00500782 Sly00514579 Sly00514580 Sly00500784 Sly00514585 Sly00514581
Solyc10g007440.3.1	Sly00482591 Sly00482593 Sly00482592 Sly00482587 Sly00482588 Sly00482590 Sly00482589 Sly00506270 Sly00482594 Sly00482598 Sly00482596 Sly00482595
Solyc10g007460.3.1	Sly00482602 Sly00482603 Sly00482604 Sly00506274 Sly00506277 Sly00506275 Sly00506273 Sly00506278
Solyc10g007430.2.1	Sly00514636 Sly00514639 Sly00500795 Sly00514637 Sly00514638 Sly00500796
Solyc10g006950.1.1	Sly00506155 Sly00482462 Sly00482463
Solyc10g007000.3.1	Sly00500690 Sly00514421 Sly00514424 Sly00514422 Sly00500692 Sly00514428 Sly00514423
Solyc10g007040.3.1	Sly00500699 Sly00500700 Sly00500701
Solyc10g007070.3.1	Sly00514451 Sly00500707 Sly00514452 Sly00514453
Solyc10g007050.3.1	Sly00514441 Sly00514446 Sly00514445 Sly00514444 Sly00514449 Sly00514447
Solyc10g007120.3.1	Sly00482499 Sly00506183 Sly00482497 Sly00506184 Sly00506186 Sly00506188 Sly00482498 Sly00506185 Sly00506187
Solyc10g007140.3.1	Sly00482506 Sly00482501 Sly00482503 Sly00482505 Sly00482504 Sly00506194 Sly00506196 Sly00506201 Sly00482507 Sly00506197
Solyc10g007150.3.1	Sly00506203 Sly00506204 Sly00506206 Sly00506207 Sly00482513 Sly00506205 Sly00482515 Sly00506208
Solyc10g007160.2.1	Sly00506212 Sly00506213
Solyc10g007225.1.1	Sly00506225 Sly00506226 Sly00506227
Solyc10g007220.2.1	Sly00482537
Solyc10g007200.3.1	Sly00482534 Sly00506218 Sly00506219 Sly00506217 Sly00506216 Sly00482535
Solyc10g007230.2.1	Sly00482543 Sly00506230
Solyc10g007250.1.1	Sly00506237 Sly00506238 Sly00482549 Sly00506240
Solyc10g007240.2.1	Sly00506232 Sly00506234 Sly00482548 Sly00506233
Solyc10g006780.3.1	Sly00500644 Sly00500645 Sly00514250 Sly00514251 Sly00514257 Sly00500648 Sly00514254 Sly00514256 Sly00514275 Sly00514273 Sly00514259 Sly00514270 Sly00514253 Sly00514261 Sly00514274 Sly00514260 Sly00514265 Sly00514276 Sly00514280 Sly00514262 Sly00514264 Sly00514263 Sly00514268 Sly00500647 Sly00514279 Sly00514277
Solyc10g006750.3.1	Sly00506074 Sly00506073 Sly00506072 Sly00506075
Solyc10g006770.3.1	Sly00506076 Sly00482383 Sly00506080 Sly00482382 Sly00506079 Sly00506081 Sly00482384
Solyc10g006760.3.1	Sly00514242 Sly00514244 Sly00514245 Sly00514243 Sly00514249 Sly00514248 Sly00500629
Solyc10g006755.1.1	Sly00514240 Sly00500623
Solyc10g006690.3.1	Sly00514219 Sly00514220 Sly00514221 Sly00514223 Sly00514222 Sly00514225 Sly00514226 Sly00506045 Sly00514224 Sly00514218 Sly00514228 Sly00514231 Sly00514235 Sly00514237 Sly00514234 Sly00514229 Sly00514227
Solyc10g045310.2.1	Sly00502302 Sly00516600 Sly00516607 Sly00516608 Sly00502303 Sly00516604 Sly00516605 Sly00516603 Sly00516618 Sly00516609
Solyc10g045320.2.1	Sly00509046 Sly00490589 Sly00490590 Sly00509045 Sly00490588
Solyc10g045290.2.1	Sly00509033 Sly00509034 Sly00490569 Sly00509035 Sly00490570 Sly00509036 Sly00490571 Sly00509038 Sly00509037
Solyc10g006850.3.1	Sly00514346 Sly00514356 Sly00514347 Sly00514353 Sly00514359 Sly00500658 Sly00514352 Sly00514357 Sly00514366 Sly00514363
Solyc10g006860.3.1	Sly00514369 Sly00514370 Sly00514371 Sly00506115 Sly00514372 Sly00482415
Solyc10g006800.3.1	Sly00514285 Sly00514287 Sly00514288 Sly00514298 Sly00514291 Sly00514289 Sly00514294 Sly00514295
Solyc10g006820.3.1	Sly00514286 Sly00514311 Sly00514312 Sly00514321 Sly00514324 Sly00514328 Sly00514303 Sly00514304 Sly00514318 Sly00514322 Sly00514316 Sly00514333 Sly00514336
Solyc10g006830.3.1	Sly00506088 Sly00506091 Sly00506101 Sly00506089 Sly00482397 Sly00506090 Sly00482401 Sly00482394 Sly00482405 Sly00482403 Sly00482404 Sly00506093 Sly00506094 Sly00482407 Sly00482398 Sly00506103 Sly00482396 Sly00482402 Sly00506092 Sly00506110 Sly00482411 Sly00506112 Sly00506111 Sly00506100 Sly00506108
Solyc10g006900.3.1	Sly00482443 Sly00482444 Sly00482447 Sly00506148
Solyc10g006890.3.1	Sly00482420 Sly00482419 Sly00506116 Sly00482423 Sly00482421 Sly00482426 Sly00506117 Sly00482422 Sly00482428 Sly00506122 Sly00482430 Sly00506121 Sly00506127 Sly00482427 Sly00482424 Sly00482425 Sly00506119 Sly00506131 Sly00482434 Sly00482437 Sly00506120 Sly00506132 Sly00482439 Sly00506137 Sly00482431 Sly00482441 Sly00506140 Sly00482435 Sly00506139 Sly00482432 Sly00482433
Solyc10g045250.1.1	Sly00509024 Sly00490504
Solyc10g045270.2.1	Sly00516564 Sly00516569 Sly00516571 Sly00516565 Sly00516567 Sly00516566 Sly00516568 Sly00516574 Sly00516581 Sly00516588 Sly00516582 Sly00516580 Sly00516572 Sly00516578 Sly00516570 Sly00516575 Sly00516594
Solyc10g006930.3.1	Sly00514377 Sly00514379 Sly00514382 Sly00514386 Sly00514388 Sly00514380 Sly00514385 Sly00514392 Sly00514391 Sly00514389 Sly00514394 Sly00500671 Sly00514401 Sly00514387 Sly00514395
Solyc10g006980.3.1	Sly00514404 Sly00514405 Sly00500678 Sly00514412
Solyc10g006500.3.1	Sly00482319 Sly00505992 Sly00505993
Solyc10g006540.3.1	Sly00506002 Sly00506003 Sly00506004 Sly00506005 Sly00506006 Sly00506007 Sly00506018 Sly00482324 Sly00506009 Sly00506010 Sly00506013 Sly00506011 Sly00482327 Sly00506017 Sly00506014 Sly00482328 Sly00506008 Sly00482329
Solyc10g006570.2.1	Sly00500565 Sly00514182
Solyc10g006560.3.1	Sly00500560 Sly00514178 Sly00514179
Solyc10g006550.2.1	Sly00514158 Sly00514159 Sly00514163 Sly00514161 Sly00514166 Sly00514162 Sly00514167 Sly00514168
Solyc10g006580.3.1	Sly00514186 Sly00514187 Sly00514189 Sly00514188 Sly00500566
Solyc10g045240.2.1	Sly00509011 Sly00490483 Sly00509016 Sly00509014 Sly00490484 Sly00509013 Sly00490487
Solyc10g006600.3.1	Sly00482337 Sly00506023 Sly00506025 Sly00482341 Sly00506030 Sly00506031 Sly00506026 Sly00506033 Sly00506037 Sly00482340 Sly00506040
Solyc10g006610.3.1	Sly00482338 Sly00514191 Sly00514192 Sly00482342 Sly00514197 Sly00514194 Sly00514195 Sly00514193 Sly00514198 Sly00514200
Solyc10g006630.2.1	Sly00506042 Sly00506043
Solyc10g006640.3.1	Sly00514202 Sly00500588
Solyc10g078670.2.1	Sly00518755 Sly00518754 Sly00518756 Sly00518758 Sly00518757
Solyc10g045150.1.1	Sly00516543 Sly00508940 Sly00516544
Solyc10g078700.2.1	Sly00518768 Sly00518764 Sly00518763 Sly00518776
Solyc10g078710.1.1	Sly00503960 Sly00518780 Sly00518784 Sly00518787 Sly00518782 Sly00518783 Sly00518786 Sly00518785
Solyc10g045153.1.1	Sly00508939 Sly00508941 Sly00508942 Sly00508945 Sly00490323 Sly00508943 Sly00508962 Sly00490325 Sly00490324 Sly00508958 Sly00490326 Sly00508956 Sly00508944
Solyc10g078730.2.1	Sly00511646 Sly00511645 Sly00511647 Sly00497719 Sly00497720
Solyc10g078720.2.1	Sly00518788 Sly00503962 Sly00518789 Sly00518790
Solyc10g045175.1.1	Sly00508975 Sly00508976 Sly00508980 Sly00508979 Sly00508977 Sly00490373 Sly00508978 Sly00508982 Sly00490375 Sly00508986 Sly00490374 Sly00508984 Sly00508990 Sly00508985 Sly00508989 Sly00508991 Sly00508994 Sly00490378 Sly00508992 Sly00508996
Solyc10g006710.3.1	Sly00482358 Sly00506048 Sly00506055 Sly00506053 Sly00506047 Sly00506051 Sly00506046 Sly00506049 Sly00506056 Sly00506052
Solyc10g006720.3.1	Sly00506057 Sly00506058 Sly00506059 Sly00506060 Sly00506061
Solyc10g006730.1.1	Sly00482368 Sly00482370 Sly00506063 Sly00482369 Sly00482373 Sly00482371 Sly00506064 Sly00482374 Sly00482372
Solyc10g006740.3.1	Sly00506067 Sly00506069 Sly00506070 Sly00482377
Solyc10g007990.3.1	Sly00506367 Sly00506365 Sly00506366 Sly00506369 Sly00482754 Sly00482755 Sly00506368
Solyc10g007940.1.1	Sly00506363 Sly00506364
Solyc10g007880.3.1	Sly00482737 Sly00482736 Sly00482738 Sly00506354
Solyc10g007840.3.1	Sly00514811 Sly00514815 Sly00514816 Sly00514812 Sly00514814 Sly00514818 Sly00500885 Sly00514817 Sly00514819 Sly00500886
Solyc10g007850.3.1	Sly00500889 Sly00514824 Sly00514830 Sly00514839 Sly00514823 Sly00514825 Sly00500888 Sly00500887 Sly00514822 Sly00514837 Sly00514843 Sly00514844 Sly00514840 Sly00514833 Sly00500894
Solyc10g007860.3.1	Sly00482717 Sly00482718
Solyc10g007950.3.1	Sly00500898 Sly00514861 Sly00514865 Sly00500901 Sly00514862 Sly00514863 Sly00514867 Sly00514866 Sly00514869 Sly00514872 Sly00500900 Sly00514870
Solyc10g007800.3.1	Sly00506350 Sly00506351
Solyc10g007810.3.1	Sly00514808 Sly00514809 Sly00514810
Solyc10g007720.3.1	Sly00514762 Sly00514763 Sly00514764
Solyc10g007730.3.1	Sly00482698 Sly00482699 Sly00506318 Sly00482700 Sly00506316 Sly00506319
Solyc10g007740.3.1	Sly00514766 Sly00514768 Sly00514767 Sly00514775 Sly00514770 Sly00514772
Solyc10g007780.2.1	Sly00506330 Sly00506329 Sly00506338 Sly00506333 Sly00506336 Sly00506337 Sly00506334 Sly00506335 Sly00506331 Sly00506339 Sly00506332 Sly00482705 Sly00506341 Sly00506342 Sly00482706
Solyc10g007790.3.1	Sly00482708
Solyc10g007770.3.1	Sly00514776 Sly00500880 Sly00514778 Sly00514779 Sly00514782 Sly00514780 Sly00514777 Sly00514783 Sly00514785 Sly00514796 Sly00514789 Sly00514798 Sly00514795
Solyc10g007690.3.1	Sly00482653 Sly00506311 Sly00506312
Solyc10g007660.3.1	Sly00500854 Sly00514742 Sly00514746 Sly00514747 Sly00514739 Sly00514743 Sly00514744
Solyc10g007680.3.1	Sly00514749 Sly00482651 Sly00514755 Sly00514756 Sly00514752 Sly00514751 Sly00514758
Solyc10g007610.3.1	Sly00506295 Sly00506297 Sly00482628 Sly00482631 Sly00506296 Sly00482629 Sly00482632 Sly00506298
Solyc10g007650.3.1	Sly00482646 Sly00506305 Sly00506304
Solyc10g007640.3.1	Sly00514736 Sly00500853 Sly00514737
Solyc10g007600.3.1	Sly00500844 Sly00514726 Sly00514732 Sly00514729 Sly00514730 Sly00514724 Sly00514727 Sly00514731 Sly00514728
Solyc10g007590.3.1	Sly00500841 Sly00514706 Sly00514710 Sly00514704 Sly00514707 Sly00514708 Sly00514709 Sly00514705 Sly00514719 Sly00514714 Sly00514712 Sly00500842
Solyc10g007570.3.1	Sly00482619 Sly00506292 Sly00482620
Solyc10g007500.3.1	Sly00514644 Sly00514643 Sly00514645 Sly00514646 Sly00514647 Sly00514648 Sly00514649 Sly00514662 Sly00514654 Sly00514661 Sly00514658 Sly00514670 Sly00514652 Sly00514675 Sly00514680 Sly00514650 Sly00514666 Sly00514678 Sly00514687 Sly00500829 Sly00500831 Sly00514677 Sly00514674 Sly00514676
Solyc10g007520.2.1	Sly00506289 Sly00506290
Solyc10g045433.1.1	Sly00509118 Sly00509119 Sly00490777 Sly00509120 Sly00509122
Solyc10g045350.2.1	Sly00516624 Sly00516626 Sly00516625 Sly00502308 Sly00502309 Sly00502310 Sly00516627
Solyc10g045395.1.1	Sly00509081 Sly00509083
Solyc10g045380.2.1	Sly00516633 Sly00516635 Sly00502313 Sly00502314 Sly00516638 Sly00516639
Solyc10g045420.2.1	Sly00490740 Sly00509087 Sly00490742 Sly00509089 Sly00490743 Sly00509094 Sly00509095 Sly00509108 Sly00509097 Sly00509103 Sly00509091 Sly00509106 Sly00509093 Sly00509107 Sly00490747 Sly00509090 Sly00490745 Sly00509088 Sly00509092 Sly00509101 Sly00509104 Sly00490746 Sly00490744 Sly00509105 Sly00490754 Sly00509113 Sly00509111 Sly00490748 Sly00509110 Sly00509112
Solyc10g078930.2.1	Sly00518831 Sly00518830 Sly00497769 Sly00518833 Sly00518835 Sly00518836 Sly00518837 Sly00504001 Sly00518838
Solyc10g078950.2.1	Sly00504003 Sly00518847 Sly00518845 Sly00518848 Sly00518846 Sly00504004 Sly00518854 Sly00518850 Sly00518849 Sly00518857
Solyc10g078940.2.1	Sly00511661 Sly00511662 Sly00497777 Sly00511663 Sly00497776 Sly00511664 Sly00511665 Sly00518844
Solyc10g078980.2.1	Sly00511667 Sly00511669 Sly00497784 Sly00511668 Sly00511670 Sly00497783
Solyc10g078900.2.1	Sly00511656 Sly00511657 Sly00497759 Sly00497758 Sly00511658 Sly00497767 Sly00497757
Solyc10g078910.2.1	Sly00518818 Sly00518819 Sly00518823 Sly00518821
Solyc10g079050.2.1	Sly00518867 Sly00504032 Sly00518868 Sly00504031 Sly00518872 Sly00518871 Sly00518869 Sly00518870
Solyc10g079040.2.1	Sly00511687 Sly00511690 Sly00511688 Sly00511689
Solyc10g079010.2.1	Sly00511674 Sly00511675 Sly00497797 Sly00511676 Sly00511678 Sly00511680 Sly00497798 Sly00511681 Sly00497800 Sly00511682 Sly00511677
Solyc10g078820.2.1	Sly00518807 Sly00503981
Solyc10g078860.2.1	Sly00503983 Sly00518809 Sly00518811 Sly00518810 Sly00518812 Sly00503984
Solyc10g078790.1.1	Sly00497731 Sly00497732 Sly00497733 Sly00497734 Sly00497735
Solyc10g078770.2.1	Sly00518798 Sly00503974 Sly00518799 Sly00503975
Solyc10g078800.2.1	Sly00503977 Sly00518802 Sly00518800 Sly00518803 Sly00518805 Sly00503978
Solyc10g078750.2.1	Sly00497725 Sly00497723 Sly00511650 Sly00497726 Sly00497727
Solyc10g024330.2.1	Sly00507729 Sly00486153 Sly00486155 Sly00507732
Solyc10g082055.1.1	Sly00512533 Sly00512534 Sly00512535 Sly00512536
Solyc10g082040.2.1	Sly00519989 Sly00504745
Solyc10g083120.2.1	Sly00519999 Sly00504751 Sly00519997 Sly00504753 Sly00520001 Sly00519998 Sly00504752 Sly00504755 Sly00520000
Solyc10g082065.1.1	Sly00512537 Sly00512539 Sly00498892 Sly00094916
Solyc10g081820.2.1	Sly00512478 Sly00498779 Sly00498780
Solyc10g081830.2.1	Sly00512481 Sly00512482 Sly00498782 Sly00512487 Sly00498785 Sly00512496 Sly00512479 Sly00512480 Sly00512486 Sly00512485 Sly00512492 Sly00498787
Solyc10g081850.2.1	Sly00512499 Sly00512509 Sly00512510 Sly00512505 Sly00498796
Solyc10g081870.2.1	Sly00498794
Solyc10g081880.2.1	Sly00519935 Sly00519936 Sly00519938 Sly00519942 Sly00519940 Sly00519941 Sly00519946 Sly00504723 Sly00519937 Sly00504714 Sly00504720 Sly00504722 Sly00519953 Sly00504716 Sly00519950
Solyc10g019260.2.1	Sly00486043 Sly00507700 Sly00486044
Solyc10g019270.2.1	Sly00507703 Sly00507704 Sly00486066
Solyc10g081940.2.1	Sly00498818 Sly00512521 Sly00512518 Sly00512523 Sly00498821
Solyc10g081910.2.1	Sly00498806 Sly00498807 Sly00498811 Sly00512516 Sly00498808 Sly00512517
Solyc10g081900.2.1	Sly00519962 Sly00519963 Sly00504730 Sly00504726 Sly00504725 Sly00504727 Sly00504728 Sly00504729
Solyc10g081950.2.1	Sly00512525 Sly00498825
Solyc10g083150.2.1	Sly00520004 Sly00520009 Sly00520015 Sly00520008 Sly00520006 Sly00520011 Sly00504761 Sly00520010 Sly00520005 Sly00520012 Sly00520022 Sly00520007
Solyc10g019190.1.1	Sly00507670 Sly00507672 Sly00485896
Solyc10g019177.1.1	Sly00507671
Solyc10g019170.2.1	Sly00485853 Sly00485856 Sly00507659 Sly00507661 Sly00485858 Sly00507660 Sly00485857
Solyc10g083190.2.1	Sly00498921 Sly00498922 Sly00512552 Sly00512553
Solyc10g083180.2.1	Sly00520031 Sly00520032 Sly00504793 Sly00520036 Sly00498918 Sly00504790 Sly00504791 Sly00520033 Sly00504788 Sly00520040 Sly00520035 Sly00504792
Solyc10g083160.2.1	Sly00498912 Sly00512541 Sly00512544 Sly00512545 Sly00498906 Sly00498909 Sly00498907 Sly00498904 Sly00498908 Sly00512543 Sly00512547 Sly00498913 Sly00498910 Sly00498911
Solyc10g083165.1.1	Sly00520026 Sly00520027 Sly00520029
Solyc10g044967.1.1	Sly00516501 Sly00516510 Sly00516495 Sly00516496 Sly00516497 Sly00516503 Sly00516500 Sly00516511 Sly00516506 Sly00516507 Sly00516498
Solyc10g044975.1.1	Sly00508840 Sly00508841
Solyc10g018870.2.1	Sly00515963 Sly00515969 Sly00515967 Sly00515966 Sly00501506
Solyc10g018907.1.1	Sly00507554 Sly00507558 Sly00507559 Sly00507564 Sly00507556 Sly00507563 Sly00485518 Sly00507555 Sly00507557
Solyc10g018903.1.1	Sly00507543 Sly00507544 Sly00507549 Sly00507546 Sly00485504 Sly00507547 Sly00507548 Sly00507545 Sly00507550 Sly00507551
Solyc10g044780.2.1	Sly00516442 Sly00516447 Sly00516461 Sly00516446 Sly00516444 Sly00516445 Sly00516457 Sly00516452 Sly00516453 Sly00516455 Sly00516448 Sly00516460 Sly00502222 Sly00516465 Sly00502220 Sly00516468 Sly00516463 Sly00516464 Sly00516467 Sly00502223 Sly00516466 Sly00516458
Solyc10g018820.1.1	Sly00485450 Sly00485449 Sly00515900 Sly00515902 Sly00515901 Sly00515903
Solyc10g018850.2.1	Sly00515899 Sly00515913 Sly00515914 Sly00515915 Sly00515916 Sly00515929 Sly00515941 Sly00515911 Sly00515924 Sly00515922 Sly00515923 Sly00515920 Sly00515917 Sly00515948 Sly00515943 Sly00515958 Sly00515946 Sly00515935 Sly00515945
Solyc10g044960.2.1	Sly00489657 Sly00508810 Sly00508817 Sly00508813 Sly00508816 Sly00508814 Sly00508824 Sly00508809 Sly00508815 Sly00508820 Sly00489658 Sly00508825 Sly00508826 Sly00508823
Solyc10g044910.2.1	Sly00508791 Sly00489613 Sly00508789 Sly00508792 Sly00489615 Sly00508798 Sly00489617 Sly00489619 Sly00489620 Sly00508795 Sly00489616 Sly00508793
Solyc10g044900.2.1	Sly00508760 Sly00508761 Sly00508762 Sly00508766 Sly00508763 Sly00508767 Sly00508775 Sly00489600 Sly00508772 Sly00508776 Sly00508769 Sly00508777
Solyc10g044880.1.1	Sly00516488 Sly00516489
Solyc10g044640.2.1	Sly00508635 Sly00508633 Sly00508634 Sly00489198 Sly00508636 Sly00489194 Sly00508640 Sly00489199 Sly00508637
Solyc10g044670.2.1	Sly00508649 Sly00508646 Sly00508645 Sly00508647 Sly00508648 Sly00489243 Sly00508650 Sly00508656 Sly00508651 Sly00489246 Sly00508655 Sly00489244 Sly00508652 Sly00508657
Solyc11g033250.2.1	Sly00508643 Sly00489229
Solyc10g044680.2.1	Sly00508659 Sly00508660 Sly00489251
Solyc10g044690.2.1	Sly00489274 Sly00508663 Sly00508665 Sly00508664
Solyc10g044530.1.1	Sly00516393 Sly00516396
Solyc10g044745.1.1	Sly00516436 Sly00516439 Sly00516438 Sly00516437 Sly00502206
Solyc10g044750.2.1	Sly00516440 Sly00516441
Solyc10g044740.2.1	Sly00508678 Sly00508679 Sly00508680 Sly00508684 Sly00508685 Sly00508693 Sly00508695 Sly00508689 Sly00508687 Sly00508683 Sly00508686 Sly00508688 Sly00508690 Sly00508697 Sly00489321 Sly00489323
Solyc10g019040.2.1	Sly00507601 Sly00507603 Sly00507604 Sly00507607 Sly00507606 Sly00507605 Sly00507602 Sly00485649 Sly00507609 Sly00507610 Sly00507612 Sly00507613 Sly00485653 Sly00507615 Sly00507619 Sly00507617 Sly00507608 Sly00507616
Solyc10g044720.2.1	Sly00516430 Sly00502197 Sly00502201 Sly00502202 Sly00502198 Sly00502200 Sly00502199 Sly00516431 Sly00516432
Solyc10g044710.2.1	Sly00516411 Sly00516422 Sly00516412 Sly00502183 Sly00516418 Sly00516427 Sly00502187 Sly00516425
Solyc10g018990.2.1	Sly00485615 Sly00507584
Solyc10g019000.2.1	Sly00507587 Sly00507585 Sly00507586
Solyc10g044997.1.1	Sly00508876 Sly00489914
Solyc10g083220.2.1	Sly00520047 Sly00520048 Sly00504800 Sly00520049 Sly00504799
Solyc10g083240.2.1	Sly00504801 Sly00520051 Sly00520053 Sly00520052 Sly00504803 Sly00504802 Sly00504804
Solyc10g083230.1.1	Sly00512556 Sly00498932 Sly00512557
Solyc10g083430.2.1	Sly00504832 Sly00520108 Sly00520109 Sly00520111 Sly00520114
Solyc10g083380.2.1	Sly00512586 Sly00512587 Sly00512588 Sly00512590 Sly00498980 Sly00512595 Sly00512596 Sly00498981 Sly00512591 Sly00512593 Sly00512598 Sly00498987 Sly00498990 Sly00512589 Sly00512592 Sly00512599 Sly00498984 Sly00498988 Sly00512608 Sly00512618 Sly00512600 Sly00512607 Sly00498998 Sly00512601 Sly00498992 Sly00512597 Sly00498985 Sly00512609 Sly00498994 Sly00512594 Sly00498996 Sly00498993 Sly00498997 Sly…
Solyc10g083450.2.1	Sly00499010 Sly00499009
Solyc10g083340.2.1	Sly00512568 Sly00498964 Sly00512574 Sly00512569 Sly00498967 Sly00512575 Sly00512570 Sly00512573
Solyc10g083400.1.1	Sly00520104 Sly00504829 Sly00520105 Sly00504830 Sly00520106
Solyc10g083350.2.1	Sly00520085 Sly00504824 Sly00520088 Sly00520087 Sly00504826 Sly00520094 Sly00520095 Sly00520091 Sly00520098 Sly00504825 Sly00520093 Sly00520096 Sly00520099 Sly00520101 Sly00520100
Solyc10g083310.2.1	Sly00520064 Sly00520065 Sly00520069 Sly00520071 Sly00520078 Sly00520079 Sly00520076
Solyc10g083330.1.1	Sly00498950 Sly00512566
Solyc10g083550.1.1	Sly00499057 Sly00512662 Sly00499058
Solyc10g083520.2.1	Sly00499046 Sly00499047 Sly00499050 Sly00512656 Sly00512655 Sly00499052
Solyc10g083530.2.1	Sly00520145 Sly00504840
Solyc10g083510.2.1	Sly00520137 Sly00520138 Sly00520139
Solyc10g083470.2.1	Sly00520116 Sly00520117 Sly00520123 Sly00520124 Sly00520119 Sly00520120 Sly00520122 Sly00520128 Sly00520129 Sly00504836 Sly00520130 Sly00504834
Solyc10g083480.2.1	Sly00520121 Sly00520125 Sly00520136
Solyc10g083490.2.1	Sly00512646 Sly00499033
Solyc10g083460.1.1	Sly00499024 Sly00499025
Solyc10g083590.2.1	Sly00504859 Sly00520155 Sly00520156 Sly00504861 Sly00520159 Sly00520158 Sly00520161
Solyc10g083580.2.1	Sly00512671 Sly00499069 Sly00499070 Sly00499071 Sly00499072 Sly00512672
Solyc10g083610.2.1	Sly00520162 Sly00504868 Sly00499074 Sly00520166 Sly00520169 Sly00520163 Sly00520164 Sly00520170 Sly00520167 Sly00520168 Sly00520175 Sly00520165 Sly00520172 Sly00499076 Sly00520171
Solyc10g083600.2.1	Sly00512673 Sly00512674 Sly00512675 Sly00512676 Sly00499075
Solyc10g083630.2.1	Sly00520178 Sly00520179 Sly00520180 Sly00520181 Sly00520183 Sly00520184 Sly00520190 Sly00520194 Sly00520189 Sly00520193 Sly00520188 Sly00520196 Sly00520197 Sly00520198 Sly00520192 Sly00520186 Sly00520187 Sly00520195 Sly00520191 Sly00504875 Sly00520199 Sly00504874
Solyc10g083540.2.1	Sly00520148 Sly00504841 Sly00520149
Solyc10g083570.2.1	Sly00520151 Sly00504843 Sly00504845 Sly00520152 Sly00504846
Solyc10g083563.1.1	Sly00512666 Sly00512667
Solyc10g083567.1.1	Sly00499066 Sly00512668
Solyc10g083740.2.1	Sly00504929 Sly00520235 Sly00499157 Sly00520231 Sly00520233 Sly00520234 Sly00520238 Sly00499161 Sly00520236
Solyc10g083710.2.1	Sly00499114 Sly00512689 Sly00499115 Sly00499117 Sly00499121 Sly00499124 Sly00499126 Sly00499135 Sly00499119 Sly00499123 Sly00499128 Sly00499127 Sly00499112 Sly00499133 Sly00499120 Sly00499125 Sly00499136 Sly00499137 Sly00499118 Sly00499134 Sly00499141 Sly00499148 Sly00499113 Sly00499149
Solyc10g083720.2.1	Sly00512688 Sly00512696 Sly00512698 Sly00512700 Sly00499152 Sly00499153 Sly00512713 Sly00512691 Sly00512714 Sly00512702 Sly00512711 Sly00512690 Sly00512710 Sly00512715 Sly00512701 Sly00512716 Sly00499155 Sly00512706 Sly00512704 Sly00512693 Sly00512718 Sly00512721 Sly00512722
Solyc10g083640.2.1	Sly00520204 Sly00504876 Sly00520207 Sly00520210 Sly00504877 Sly00520205 Sly00520206 Sly00520209 Sly00520211 Sly00520213 Sly00520208 Sly00504879 Sly00504881 Sly00520212
Solyc10g083690.3.1	Sly00499101 Sly00512687
Solyc10g083670.2.1	Sly00504914 Sly00520224
Solyc10g083795.1.1	Sly00499176 Sly00512735 Sly00499175 Sly00512737 Sly00499177 Sly00512736 Sly00499178 Sly00512740 Sly00512738 Sly00512741 Sly00499179
Solyc10g083800.2.1	Sly00512749 Sly00512750 Sly00499189 Sly00499190 Sly00512751 Sly00512759 Sly00512764 Sly00499191 Sly00512757 Sly00512765 Sly00512753 Sly00512758 Sly00512761 Sly00512767 Sly00499194 Sly00512766 Sly00512760 Sly00499196 Sly00512769 Sly00499195 Sly00512752 Sly00499197 Sly00499193 Sly00499199
Solyc10g083760.2.1	Sly00520243 Sly00520247 Sly00520248 Sly00520246 Sly00504934 Sly00520250 Sly00520244 Sly00504932
Solyc10g083730.2.1	Sly00499158 Sly00499159
Solyc10g083790.2.1	Sly00512724 Sly00512728 Sly00512729 Sly00512725 Sly00512727 Sly00512731 Sly00512730 Sly00512733 Sly00499169
Solyc10g083770.2.1	Sly00504935 Sly00520252 Sly00520253
Solyc10g083830.2.1	Sly00504937 Sly00520254 Sly00520256 Sly00520257 Sly00520271 Sly00520263 Sly00520273 Sly00520269 Sly00520258 Sly00520277 Sly00520259 Sly00520281 Sly00520264 Sly00520274 Sly00520266
Solyc10g083850.2.1	Sly00520286 Sly00520288 Sly00520290 Sly00520291 Sly00520292
Solyc10g083930.2.1	Sly00520329 Sly00504984
Solyc10g083920.2.1	Sly00520315 Sly00520319 Sly00520320 Sly00504968 Sly00504969 Sly00504970
Solyc10g083880.2.1	Sly00499212 Sly00512774
Solyc10g083890.2.1	Sly00520305 Sly00520306 Sly00520309 Sly00504960 Sly00520307 Sly00520308 Sly00504961
Solyc10g083860.2.1	Sly00504942 Sly00520296 Sly00504959 Sly00520297 Sly00520299 Sly00520295 Sly00520303 Sly00520298
Solyc10g083940.1.1	Sly00499217 Sly00499221
Solyc10g083950.1.1	Sly00520331 Sly00504985
Solyc10g083960.2.1	Sly00512777 Sly00512781 Sly00512783 Sly00512789 Sly00512779 Sly00512778 Sly00512796 Sly00512780 Sly00512787 Sly00512784 Sly00512803 Sly00512791 Sly00512800 Sly00512795 Sly00499232 Sly00512792
Solyc10g084000.2.1	Sly00499242 Sly00512813 Sly00512815
Solyc10g084023.1.1	Sly00499249 Sly00512817 Sly00512818 Sly00512821 Sly00512820
Solyc10g083990.2.1	Sly00520338 Sly00520346 Sly00520348
Solyc10g084045.1.1	Sly00512827 Sly00499263 Sly00512828 Sly00499264 Sly00512832 Sly00499259 Sly00499262 Sly00499265 Sly00499260 Sly00499269 Sly00512831 Sly00499266 Sly00512830 Sly00512834 Sly00512835 Sly00512836 Sly00512833 Sly00499270
Solyc10g084050.2.1	Sly00512838 Sly00499273 Sly00512839 Sly00499274 Sly00512841 Sly00512840
Solyc10g083970.1.1	Sly00504988 Sly00520333 Sly00520334 Sly00520335
Solyc10g084140.2.1	Sly00505002 Sly00520378 Sly00520374 Sly00505001 Sly00520373 Sly00520376 Sly00520369 Sly00520370 Sly00520379 Sly00505010 Sly00520381 Sly00520366
Solyc10g084080.2.1	Sly00512844 Sly00512845 Sly00512846 Sly00512856 Sly00512849 Sly00512850 Sly00512855 Sly00512854 Sly00499286 Sly00499287
Solyc10g084090.2.1	Sly00499288 Sly00512862 Sly00512863 Sly00512864 Sly00512872 Sly00512867 Sly00499291 Sly00512866 Sly00512868 Sly00512865 Sly00512877 Sly00512870 Sly00512869 Sly00512871 Sly00499292 Sly00499289 Sly00499297 Sly00512873 Sly00512874 Sly00499294 Sly00512876 Sly00499298 Sly00512875 Sly00499290
Solyc10g084100.2.1	Sly00499299 Sly00520361 Sly00499300 Sly00499301 Sly00504998
Solyc10g084160.2.1	Sly00499322 Sly00512883 Sly00499323 Sly00512886 Sly00512884 Sly00512891 Sly00512893 Sly00512889 Sly00499324
Solyc10g084150.2.1	Sly00520387 Sly00520392 Sly00505013
Solyc10g084060.2.1	Sly00504995 Sly00504996 Sly00520355 Sly00504997
Solyc10g080730.2.1	Sly00519641 Sly00519642 Sly00519644 Sly00519645 Sly00519648 Sly00519643 Sly00519649
Solyc10g080810.2.1	Sly00498449 Sly00498450 Sly00512143 Sly00512145 Sly00498454 Sly00512144 Sly00498453
Solyc10g080740.2.1	Sly00512120 Sly00512122 Sly00512123 Sly00512124 Sly00512121 Sly00498413
Solyc10g080770.2.1	Sly00498433 Sly00498432 Sly00498439 Sly00498436 Sly00512131 Sly00498438 Sly00512132 Sly00498437
Solyc10g080610.1.1	Sly00498327 Sly00498326
Solyc10g080640.2.1	Sly00512103 Sly00512104 Sly00498376 Sly00498377 Sly00512107
Solyc10g080600.2.1	Sly00519546 Sly00519545
Solyc10g080720.2.1	Sly00519612 Sly00519614 Sly00519613 Sly00519621 Sly00519624 Sly00519633 Sly00519616 Sly00519617 Sly00519619 Sly00519631 Sly00519618 Sly00519620 Sly00519628 Sly00519632 Sly00519634 Sly00519635 Sly00519625 Sly00504471
Solyc10g080700.2.1	Sly00519608 Sly00519609 Sly00519610 Sly00504437 Sly00519611
Solyc10g080680.2.1	Sly00504434 Sly00519593 Sly00519599 Sly00519595 Sly00519598 Sly00519594 Sly00519605 Sly00504435 Sly00519604 Sly00519592 Sly00519596
Solyc10g080670.2.1	Sly00498381 Sly00498380 Sly00498382 Sly00512117 Sly00512116 Sly00498383 Sly00498385
Solyc10g080630.2.1	Sly00519549 Sly00519550 Sly00519551 Sly00519552 Sly00519558 Sly00519560 Sly00519553 Sly00519555 Sly00519573 Sly00519559 Sly00519564 Sly00519566 Sly00519557 Sly00519565 Sly00519568 Sly00519556 Sly00519578 Sly00519567 Sly00519563
Solyc10g080650.2.1	Sly00498379 Sly00512115
Solyc10g080520.2.1	Sly00519516 Sly00519517 Sly00519524 Sly00504394 Sly00504402 Sly00519518 Sly00519519 Sly00519521 Sly00519522 Sly00504404
Solyc10g080550.2.1	Sly00519530 Sly00519533 Sly00519531 Sly00519532 Sly00519535 Sly00519534 Sly00519536
Solyc10g080560.2.1	Sly00498306 Sly00498307 Sly00512090 Sly00512092
Solyc10g080590.2.1	Sly00519540 Sly00519543 Sly00519541 Sly00519544
Solyc10g080580.1.1	Sly00498315 Sly00498316 Sly00498317
Solyc10g080440.2.1	Sly00498274 Sly00498275 Sly00512077
Solyc10g080460.2.1	Sly00519492 Sly00519493 Sly00519494 Sly00519495 Sly00504379 Sly00519496
Solyc10g080450.2.1	Sly00519482 Sly00519483 Sly00504378 Sly00519484 Sly00519486 Sly00519487 Sly00519485 Sly00519490 Sly00519488
Solyc10g080510.1.1	Sly00504393 Sly00519515 Sly00519514
Solyc10g080490.2.1	Sly00519501 Sly00519502 Sly00519503 Sly00519510 Sly00504391 Sly00519504 Sly00504392 Sly00519509 Sly00519513
Solyc10g080480.2.1	Sly00498284 Sly00498282 Sly00498283
Solyc10g044510.2.1	Sly00508600 Sly00508608 Sly00489038 Sly00508603 Sly00508604 Sly00508609 Sly00508601 Sly00508602
Solyc10g044480.2.1	Sly00508572 Sly00508573 Sly00508574 Sly00508575 Sly00508577 Sly00508586 Sly00508582 Sly00508576 Sly00508594 Sly00508581 Sly00489006 Sly00508585 Sly00508579
Solyc10g044450.2.1	Sly00488964 Sly00488963 Sly00488966 Sly00488965 Sly00508528 Sly00508524 Sly00488968 Sly00488967 Sly00508525 Sly00488969 Sly00508526 Sly00508529 Sly00508535 Sly00508531 Sly00488976 Sly00488972
Solyc10g044470.2.1	Sly00508548 Sly00508550 Sly00508551 Sly00489000 Sly00489003 Sly00489001 Sly00508560 Sly00508549 Sly00508562 Sly00489002 Sly00508570 Sly00508565 Sly00508571 Sly00508567
Solyc10g044435.1.1	Sly00516385 Sly00516386
Solyc10g062340.2.1	Sly00516374 Sly00516377 Sly00516379 Sly00516383 Sly00516381 Sly00516376 Sly00516378 Sly00516375 Sly00516382 Sly00501962 Sly00501964 Sly00501963
Solyc10g080817.1.1	Sly00512151 Sly00498455
Solyc10g080855.1.1	Sly00512155 Sly00512157
Solyc10g080850.1.1	Sly00512153
Solyc10g062200.2.1	Sly00501945 Sly00516342 Sly00516343 Sly00516345 Sly00516351 Sly00501944 Sly00516348 Sly00516355 Sly00501946
Solyc10g062220.2.1	Sly00501947 Sly00516353
Solyc10g080880.2.1	Sly00519656 Sly00519662 Sly00519657
Solyc10g080840.1.1	Sly00519652 Sly00519654
Solyc10g062180.2.1	Sly00488719 Sly00488718 Sly00508442 Sly00508445 Sly00508449 Sly00508453 Sly00508446 Sly00508457 Sly00508456 Sly00508459 Sly00508472 Sly00508473 Sly00508443 Sly00508464 Sly00508458 Sly00508450 Sly00508451
Solyc10g062160.2.1	Sly00516311 Sly00516316 Sly00516314 Sly00516320 Sly00516332 Sly00501928 Sly00516331 Sly00516319 Sly00516322 Sly00516329 Sly00516337 Sly00516339 Sly00516318 Sly00516336 Sly00516315 Sly00516324 Sly00516325
Solyc10g062130.1.1	Sly00508418
Solyc10g024360.2.1	Sly00486202 Sly00507746 Sly00507749 Sly00507750 Sly00507745
Solyc10g024370.2.1	Sly00486203 Sly00507760 Sly00486206 Sly00507764 Sly00507757 Sly00507769 Sly00486229 Sly00507765 Sly00507761
Solyc10g024337.1.1	Sly00507741 Sly00486176
Solyc10g062100.1.1	Sly00488558 Sly00508405
Solyc10g024420.2.1	Sly00516004 Sly00516019 Sly00501577 Sly00501566 Sly00501565 Sly00501572 Sly00516021 Sly00516016 Sly00516023 Sly00516024 Sly00501570 Sly00501567 Sly00501574 Sly00501568 Sly00501575 Sly00501571 Sly00501576 Sly00501573
Solyc10g024480.1.1	Sly00516030 Sly00516031
Solyc10g061970.2.1	Sly00516300 Sly00501866
Solyc10g061960.2.1	Sly00508379 Sly00488451 Sly00508380 Sly00508382 Sly00508381
Solyc10g062035.1.1	Sly00508390 Sly00508391
Solyc10g024470.2.1	Sly00486393 Sly00486394 Sly00507854 Sly00507856 Sly00486392 Sly00507861 Sly00507858 Sly00507864
Solyc10g061940.2.1	Sly00508360 Sly00488373 Sly00508362 Sly00508363 Sly00508365 Sly00508366 Sly00488368 Sly00488371
Solyc10g061950.2.1	Sly00501855 Sly00501854 Sly00501853 Sly00516292 Sly00516290 Sly00516294 Sly00516291 Sly00516295 Sly00516296
Solyc10g024510.2.1	Sly00516039
Solyc10g026525.1.1	Sly00507888 Sly00507889
Solyc10g026527.1.1	Sly00516041 Sly00516042
Solyc10g024490.2.1	Sly00516032 Sly00516033 Sly00516034 Sly00516038 Sly00516036 Sly00516037 Sly00501582 Sly00516035
Solyc10g081180.2.1	Sly00512220 Sly00512222 Sly00512223 Sly00498565 Sly00498564
Solyc10g080940.2.1	Sly00519680
Solyc10g081010.2.1	Sly00519681 Sly00519683 Sly00519684 Sly00519685 Sly00504517
Solyc10g081020.2.1	Sly00519692 Sly00519693 Sly00519694 Sly00519705 Sly00519698 Sly00519695 Sly00519699 Sly00519696 Sly00519697 Sly00519703 Sly00504524 Sly00519701 Sly00519706 Sly00519707 Sly00519700
Solyc10g081040.1.1	Sly00504526 Sly00519708
Solyc10g081050.1.1	Sly00519709 Sly00519710 Sly00504531 Sly00519711 Sly00504533
Solyc10g081080.1.1	Sly00519713
Solyc10g081110.2.1	Sly00519721 Sly00504540 Sly00519722 Sly00519716
Solyc10g081120.2.1	Sly00519724 Sly00519725 Sly00519728 Sly00519729 Sly00504551 Sly00519727 Sly00519726 Sly00519730 Sly00519733 Sly00519731
Solyc10g081140.2.1	Sly00519734 Sly00519737 Sly00519735 Sly00504555 Sly00519736 Sly00504556 Sly00504557 Sly00519739
Solyc10g081170.2.1	Sly00519745 Sly00519748 Sly00519749 Sly00519751 Sly00519752 Sly00504570 Sly00519746
Solyc10g081190.2.1	Sly00498568 Sly00498571 Sly00498570 Sly00498572 Sly00498569
Solyc10g081200.1.1	Sly00519753 Sly00519757 Sly00512227 Sly00512228 Sly00512229 Sly00512230 Sly00519756 Sly00519754 Sly00519755 Sly00504580 Sly00504581
Solyc10g081220.2.1	Sly00498576 Sly00498579 Sly00498577 Sly00498581 Sly00498580 Sly00498578 Sly00512235 Sly00512237 Sly00512236
Solyc10g081240.2.1	Sly00512243 Sly00512244 Sly00512245 Sly00498584 Sly00498588
Solyc10g081250.2.1	Sly00498586 Sly00512258 Sly00512259 Sly00512263 Sly00498596 Sly00512251 Sly00512260 Sly00498587 Sly00498590 Sly00512255 Sly00512265 Sly00512275 Sly00512264 Sly00498595 Sly00512277 Sly00512249
Solyc10g081280.2.1	Sly00512283 Sly00512284 Sly00512285 Sly00498599 Sly00498601 Sly00498604 Sly00512294 Sly00512289 Sly00512286 Sly00498603 Sly00498610 Sly00512296 Sly00512292 Sly00512300
Solyc10g081270.2.1	Sly00519762 Sly00504586 Sly00519765 Sly00519763 Sly00519766 Sly00504587
Solyc10g081350.2.1	Sly00512313 Sly00498635 Sly00498636 Sly00512314 Sly00512318 Sly00512317
Solyc10g081330.2.1	Sly00504597 Sly00519777 Sly00519779
Solyc10g081340.1.1	Sly00498630 Sly00512312
Solyc10g080930.2.1	Sly00519665 Sly00519667 Sly00519666 Sly00519668 Sly00519669 Sly00504508 Sly00519671 Sly00519670
Solyc10g080910.1.1	Sly00504507 Sly00519663 Sly00519664
Solyc10g081150.2.1	Sly00512206 Sly00512205 Sly00498559 Sly00498558 Sly00512207 Sly00512212
Solyc10g081060.2.1	Sly00512190 Sly00512191 Sly00512195 Sly00512192 Sly00512196 Sly00512194 Sly00498541
Solyc10g081100.2.1	Sly00498543 Sly00498544 Sly00498545
Solyc10g081030.2.1	Sly00498535 Sly00498534 Sly00512184
Solyc10g080990.2.1	Sly00498531 Sly00512183
Solyc10g080950.2.1	Sly00512170 Sly00512171 Sly00498511
Solyc10g081650.2.1	Sly00519889 Sly00519890 Sly00519895 Sly00519885 Sly00519888 Sly00504679 Sly00504680 Sly00519898 Sly00519886 Sly00519893 Sly00519896 Sly00519897
Solyc10g081680.1.1	Sly00512420 Sly00498739
Solyc10g081590.2.1	Sly00498706 Sly00512365 Sly00512366 Sly00498707
Solyc10g081560.2.1	Sly00519855 Sly00519849 Sly00519847 Sly00504657 Sly00519851 Sly00519848 Sly00519856
Solyc10g081570.2.1	Sly00519863 Sly00519864 Sly00519871 Sly00519867 Sly00519869 Sly00519870 Sly00519872 Sly00504674 Sly00504663
Solyc10g081600.2.1	Sly00512369 Sly00512370 Sly00512371 Sly00512372 Sly00512373 Sly00512377 Sly00498714
Solyc10g081610.2.1	Sly00519873 Sly00519874 Sly00519876 Sly00519879 Sly00519882 Sly00519884 Sly00504676 Sly00519878 Sly00519883
Solyc10g081630.2.1	Sly00498720 Sly00512386 Sly00498721 Sly00498723 Sly00498722
Solyc10g081640.2.1	Sly00512388 Sly00512389 Sly00498725 Sly00512393
Solyc10g081660.2.1	Sly00512394 Sly00512396 Sly00512397 Sly00512395 Sly00512402 Sly00512400 Sly00512405 Sly00512406 Sly00498730 Sly00512409 Sly00512398 Sly00512408 Sly00498727 Sly00498728 Sly00498731 Sly00512410 Sly00512411 Sly00512401
Solyc10g081750.1.1	Sly00504704 Sly00504701 Sly00519911 Sly00504705 Sly00504706 Sly00519908
Solyc10g081720.2.1	Sly00498760 Sly00498761
Solyc10g081690.1.1	Sly00519900 Sly00519901
Solyc10g081730.2.1	Sly00519902 Sly00504694 Sly00519903 Sly00519904
Solyc10g081790.1.1	Sly00498769 Sly00498770
Solyc10g081810.2.1	Sly00512466 Sly00512467 Sly00512473 Sly00512471 Sly00512468 Sly00512469 Sly00512470 Sly00512472 Sly00512476 Sly00512477
Solyc10g081770.2.1	Sly00519918 Sly00519915 Sly00519917 Sly00519919 Sly00519923 Sly00519922 Sly00519921 Sly00519916 Sly00504709 Sly00519925 Sly00504710 Sly00519933
Solyc10g081700.2.1	Sly00498744 Sly00512422 Sly00512423 Sly00498743
Solyc10g081710.2.1	Sly00512426 Sly00512425 Sly00512427 Sly00512431 Sly00512424 Sly00512436 Sly00512447 Sly00512446 Sly00512448 Sly00498751 Sly00512428 Sly00512432 Sly00512435 Sly00512440 Sly00512434 Sly00512441 Sly00512449 Sly00512443 Sly00512450
Solyc10g081420.2.1	Sly00519792 Sly00519793 Sly00519795 Sly00519796 Sly00519797 Sly00519798 Sly00519803 Sly00519805 Sly00504606 Sly00519794 Sly00519801 Sly00519809 Sly00504603
Solyc10g081430.2.1	Sly00504608 Sly00504609
Solyc10g081380.2.1	Sly00519791 Sly00504602
Solyc10g081390.1.1	Sly00512322 Sly00498642 Sly00512323
Solyc10g081510.2.1	Sly00498682 Sly00512341 Sly00512343 Sly00512346 Sly00512344 Sly00498683 Sly00512340 Sly00512348 Sly00498691 Sly00512351 Sly00498688 Sly00512349 Sly00512345 Sly00512342 Sly00498687 Sly00498684
Solyc10g081540.2.1	Sly00519844 Sly00504644 Sly00519842 Sly00504646 Sly00519846 Sly00504648 Sly00519845 Sly00504647
Solyc10g081530.2.1	Sly00519841 Sly00519840 Sly00504637 Sly00504635 Sly00504641
Solyc10g081490.2.1	Sly00498669 Sly00498671 Sly00498670 Sly00512335
Solyc10g081500.1.1	Sly00512338 Sly00512339
Solyc10g081460.2.1	Sly00519821 Sly00519823 Sly00519822 Sly00519824 Sly00519825 Sly00504613 Sly00504611 Sly00519826 Sly00519828
Solyc10g017810.2.1	Sly00484153 Sly00515659 Sly00515666 Sly00501309 Sly00501311 Sly00515661 Sly00515662 Sly00484154 Sly00515664 Sly00501310 Sly00515663 Sly00501312 Sly00501313 Sly00515665 Sly00507225 Sly00501314 Sly00507226 Sly00515669
Solyc10g017850.3.1	Sly00484166 Sly00507231 Sly00507232 Sly00484168
Solyc10g017940.1.1	Sly00507242 Sly00507243
Solyc10g017890.1.1	Sly00507237 Sly00507238
Solyc10g018310.1.1	Sly00515740 Sly00515741
Solyc10g018150.2.1	Sly00501354 Sly00515700
Solyc10g018300.2.1	Sly00515714 Sly00515715 Sly00515716 Sly00515717 Sly00501372
Solyc10g018196.1.1	Sly00484464 Sly00507318
Solyc10g018120.2.1	Sly00507287 Sly00484349 Sly00507288
Solyc10g018140.2.1	Sly00501351 Sly00501352
Solyc10g018160.2.1	Sly00484384 Sly00484386 Sly00507300 Sly00484387
Solyc10g018010.2.1	Sly00507262
Solyc10g017990.2.1	Sly00515687 Sly00515688
Solyc10g018070.1.1	Sly00484326
Solyc10g054737.1.1	Sly00496064 Sly00510680
Solyc10g054850.2.1	Sly00517956 Sly00517958
Solyc10g054930.2.1	Sly00510718 Sly00510719 Sly00510720 Sly00496138 Sly00496139 Sly00510723 Sly00496136 Sly00510721 Sly00510724
Solyc10g054910.1.1	Sly00496110 Sly00496111
Solyc10g054870.2.1	Sly00517964 Sly00517965 Sly00517962 Sly00517963 Sly00517966 Sly00517968 Sly00517967 Sly00517969
Solyc10g054880.2.1	Sly00510694 Sly00510698 Sly00496105 Sly00510692 Sly00510693 Sly00510696 Sly00510697 Sly00510699 Sly00510695 Sly00496102 Sly00510703 Sly00510704 Sly00510701 Sly00510702 Sly00510700 Sly00510708 Sly00496104
Solyc10g054860.2.1	Sly00496087 Sly00496091 Sly00496090 Sly00510683 Sly00496092 Sly00510682 Sly00496088 Sly00510684 Sly00510686
Solyc10g054660.2.1	Sly00496017 Sly00496019 Sly00496018 Sly00510665
Solyc10g050440.2.1	Sly00494385
Solyc10g050470.2.1	Sly00494405 Sly00517321 Sly00510184 Sly00517322
Solyc10g050490.1.1	Sly00510185 Sly00510186
Solyc10g054730.1.1	Sly00517936 Sly00517937 Sly00517939 Sly00517938 Sly00517941 Sly00517940 Sly00517942 Sly00517943 Sly00517945 Sly00503236 Sly00517944
Solyc10g054790.2.1	Sly00517948 Sly00503270
Solyc10g054800.2.1	Sly00517949 Sly00503271
Solyc10g054840.2.1	Sly00503281 Sly00517953 Sly00517951 Sly00503278 Sly00517954 Sly00517952 Sly00503279
Solyc10g050320.1.1	Sly00517300 Sly00517301
Solyc10g054320.2.1	Sly00517862 Sly00517863 Sly00517865 Sly00517870
Solyc10g054280.2.1	Sly00517854 Sly00517851 Sly00517853 Sly00517857 Sly00503053 Sly00503055
Solyc10g050570.1.1	Sly00517377 Sly00502802 Sly00517379
Solyc10g054420.2.1	Sly00510636 Sly00495924 Sly00510637 Sly00495926 Sly00510640 Sly00495925
Solyc10g054330.2.1	Sly00510611 Sly00510613 Sly00510615 Sly00510616 Sly00510618 Sly00510617 Sly00510626 Sly00510614 Sly00510625 Sly00495887 Sly00495889 Sly00510627 Sly00510612 Sly00495888 Sly00510619 Sly00495890 Sly00495892 Sly00510629 Sly00510630
Solyc10g054350.1.1	Sly00510631
Solyc10g054410.1.1	Sly00517879 Sly00517880
Solyc10g039190.2.1	Sly00487800 Sly00508192 Sly00508193 Sly00487801
Solyc10g054440.2.1	Sly00503072 Sly00503073 Sly00517883 Sly00503152
Solyc10g050550.2.1	Sly00502800 Sly00517366 Sly00517369 Sly00517370
Solyc10g050540.2.1	Sly00517340 Sly00517344 Sly00517345 Sly00517346 Sly00517349 Sly00502791 Sly00517354 Sly00517341 Sly00502797 Sly00517352 Sly00517353 Sly00517347 Sly00517355 Sly00502799 Sly00517359 Sly00517348 Sly00517350 Sly00517361 Sly00502793 Sly00502792
Solyc10g054480.2.1	Sly00503207 Sly00517893 Sly00517898 Sly00517889 Sly00503208 Sly00517895 Sly00517894 Sly00517896 Sly00503209 Sly00517897 Sly00517890 Sly00517899
Solyc10g054550.1.1	Sly00517912 Sly00517911
Solyc10g054080.2.1	Sly00517784 Sly00517785 Sly00517787 Sly00517788 Sly00517789 Sly00503042 Sly00517792 Sly00517786 Sly00517790 Sly00517800 Sly00517796 Sly00517794 Sly00517802
Solyc10g054050.2.1	Sly00510580 Sly00495758 Sly00503039 Sly00495757
Solyc10g017760.2.1	Sly00515656 Sly00501302 Sly00501301
Solyc10g054130.2.1	Sly00495788 Sly00495790 Sly00510587 Sly00495789
Solyc10g050760.1.1	Sly00517400 Sly00517401
Solyc10g017655.1.1	Sly00484025 Sly00507203 Sly00507204
Solyc10g050735.1.1	Sly00510216 Sly00510217 Sly00510218 Sly00510223 Sly00510225 Sly00510227 Sly00494573 Sly00510219 Sly00510220 Sly00510229 Sly00510228 Sly00494574 Sly00494586 Sly00494590
Solyc10g017630.2.1	Sly00515647 Sly00515648 Sly00515650 Sly00515649
Solyc10g050757.1.1	Sly00517398 Sly00502815 Sly00517399
Solyc10g050753.1.1	Sly00517395 Sly00517396
Solyc10g050770.1.1	Sly00494620
Solyc10g054274.1.1	Sly00510602 Sly00510604
Solyc10g038130.2.1	Sly00516131 Sly00516132 Sly00516134 Sly00501740 Sly00516135 Sly00501738 Sly00516133 Sly00516143 Sly00516139 Sly00516144 Sly00516151 Sly00516138 Sly00516146 Sly00501741 Sly00516136 Sly00516150 Sly00516141
Solyc10g050905.1.1	Sly00517440 Sly00517441 Sly00502842 Sly00517442
Solyc10g050910.1.1	Sly00517447 Sly00517446
Solyc10g053900.2.1	Sly00517742 Sly00517745 Sly00503019 Sly00503021 Sly00517743 Sly00503020
Solyc10g039390.1.1	Sly00516225 Sly00501815
Solyc10g050900.1.1	Sly00494786 Sly00510323
Solyc10g053910.2.1	Sly00495664 Sly00510564
Solyc10g050778.1.1	Sly00517408 Sly00517409 Sly00517410 Sly00517412 Sly00517413
Solyc10g050840.2.1	Sly00510258 Sly00510259 Sly00510260 Sly00510261 Sly00510267 Sly00510269 Sly00510281 Sly00494715 Sly00494716 Sly00510262 Sly00510263 Sly00510280 Sly00510286 Sly00510304 Sly00510284 Sly00510288 Sly00510272 Sly00510305 Sly00510311 Sly00494714 Sly00510276 Sly00510314 Sly00510264 Sly00510307 Sly00494721
Solyc10g054040.2.1	Sly00517771 Sly00517776 Sly00517777 Sly00517773 Sly00503036 Sly00517775 Sly00503037
Solyc10g053970.2.1	Sly00517758 Sly00503030 Sly00517759 Sly00517762 Sly00503029 Sly00517765 Sly00517763 Sly00517766 Sly00503031
Solyc10g050860.2.1	Sly00517422 Sly00502828 Sly00517425 Sly00517423 Sly00517426 Sly00517431 Sly00517427 Sly00517428 Sly00517424 Sly00517430
Solyc10g050870.2.1	Sly00517434 Sly00502832 Sly00517436
Solyc10g050890.2.1	Sly00517438 Sly00502837
Solyc10g039430.2.1	Sly00501819 Sly00516233 Sly00516235 Sly00516238 Sly00516244 Sly00516262 Sly00516234 Sly00516248 Sly00516255 Sly00516283 Sly00501827 Sly00516246 Sly00516245 Sly00516236 Sly00516264 Sly00516265 Sly00516279 Sly00516252 Sly00516250 Sly00516256 Sly00516254 Sly00516253 Sly00516259 Sly00516258 Sly00501824 Sly00516260 Sly00516278 Sly00501821 Sly00501823 Sly00501820 Sly00516261 Sly00516251 Sly00516284 Sly…
Solyc10g051050.2.1	Sly00510360 Sly00510361 Sly00510359 Sly00510362 Sly00494892
Solyc10g039280.2.1	Sly00508216 Sly00487872 Sly00487873 Sly00508217 Sly00487876
Solyc10g051095.1.1	Sly00517485 Sly00517486 Sly00517487 Sly00517488 Sly00517490 Sly00517501 Sly00517512 Sly00517504 Sly00517491 Sly00517499 Sly00517516 Sly00517510 Sly00517515 Sly00517489 Sly00502912 Sly00517508 Sly00517505 Sly00502908 Sly00517513 Sly00517507 Sly00517497 Sly00517522 Sly00502913 Sly00517519 Sly00517514 Sly00517502 Sly00517496
Solyc10g051120.2.1	Sly00517528 Sly00502915 Sly00517533 Sly00517524 Sly00517525 Sly00517537 Sly00517529
Solyc10g039230.1.1	Sly00516178 Sly00501774 Sly00501773
Solyc10g039290.2.1	Sly00501782 Sly00516189 Sly00516190 Sly00516191 Sly00516194 Sly00516195 Sly00516196
Solyc10g039270.2.1	Sly00516184 Sly00501778 Sly00516186 Sly00516185 Sly00501779 Sly00516187
Solyc10g039367.1.1	Sly00508265 Sly00508266 Sly00508269 Sly00508267 Sly00488001
Solyc10g050990.1.1	Sly00494848 Sly00510342
Solyc10g053880.1.1	Sly00517731 Sly00517737 Sly00517740 Sly00517739
Solyc10g051010.2.1	Sly00517455 Sly00517459 Sly00517464 Sly00502875 Sly00517456 Sly00502877 Sly00517467 Sly00502880 Sly00517463 Sly00502878
Solyc10g051030.2.1	Sly00502888 Sly00517470 Sly00517471 Sly00517474 Sly00502886 Sly00502890
Solyc10g052880.1.1	Sly00495623 Sly00495624
Solyc10g052869.1.1	Sly00517724
Solyc10g039360.2.1	Sly00508240 Sly00508239 Sly00508238 Sly00487970 Sly00487973 Sly00487976 Sly00487980 Sly00508242 Sly00487981 Sly00487972 Sly00487971 Sly00487975 Sly00508241 Sly00508243 Sly00487982 Sly00508246 Sly00487974 Sly00487977 Sly00508247 Sly00508248 Sly00508259 Sly00508260 Sly00508257 Sly00487978 Sly00508250 Sly00508245 Sly00508249 Sly00508253 Sly00508258 Sly00487979 Sly00487983 Sly00508262 Sly00508251 Sly…
Solyc10g061860.1.1	Sly00508310 Sly00488138
Solyc10g061840.2.1	Sly00488133 Sly00508309
Solyc10g018397.1.1	Sly00515757 Sly00515756 Sly00515759
Solyc10g018390.2.1	Sly00515752 Sly00515753 Sly00515755 Sly00515754
Solyc10g018393.1.1	Sly00507353 Sly00507354
Solyc10g018510.2.1	Sly00515767 Sly00501439 Sly00515770 Sly00515768
Solyc10g018520.1.1	Sly00501444 Sly00515771
Solyc10g018610.1.1	Sly00507423 Sly00507422
Solyc10g018530.2.1	Sly00515772 Sly00515774 Sly00515799 Sly00515779 Sly00515777 Sly00515780 Sly00515796 Sly00515807 Sly00515782 Sly00515793 Sly00515798 Sly00515810
Solyc10g018540.2.1	Sly00515773 Sly00515776 Sly00515775 Sly00501458 Sly00515816 Sly00515826
Solyc10g018600.2.1	Sly00484942 Sly00484943 Sly00507419 Sly00507420 Sly00507421 Sly00484944 Sly00484945
Solyc10g018590.2.1	Sly00484936 Sly00507407 Sly00507410 Sly00507405 Sly00507409 Sly00507408 Sly00507406 Sly00484935 Sly00484937 Sly00507411
Solyc10g018780.2.1	Sly00501489 Sly00515887 Sly00515888
Solyc10g018817.1.1	Sly00507520 Sly00507521
Solyc06g034310.3.1	Sly00515840 Sly00515841 Sly00515842 Sly00501466 Sly00501467 Sly00501468 Sly00501465 Sly00501464 Sly00515844
Solyc10g084240.2.1	Sly00499336 Sly00512906 Sly00512905 Sly00499337
Solyc10g084210.2.1	Sly00505020 Sly00520404 Sly00520405 Sly00520406 Sly00499329 Sly00499328 Sly00520403 Sly00512901 Sly00499331 Sly00520402 Sly00499330 Sly00520408 Sly00505021 Sly00499333 Sly00499332 Sly00520407
Solyc10g084265.1.1	Sly00505024 Sly00520416 Sly00505025
Solyc10g084280.2.1	Sly00499354 Sly00512917 Sly00499357 Sly00499358 Sly00512916 Sly00512915 Sly00499356 Sly00499359
Solyc10g084290.2.1	Sly00512922 Sly00499361 Sly00512923 Sly00512926 Sly00512924 Sly00512925
Solyc10g084220.2.1	Sly00512899 Sly00512900 Sly00512902 Sly00512903
Solyc10g052490.2.1	Sly00495290 Sly00495289 Sly00510475 Sly00510473 Sly00495291 Sly00510472 Sly00495293 Sly00495292
Solyc10g052500.2.1	Sly00510474 Sly00510479 Sly00510477 Sly00495297 Sly00510478 Sly00495298
Solyc10g052510.2.1	Sly00510483 Sly00510482 Sly00495300 Sly00495302 Sly00495299
Solyc10g085480.2.1	Sly00499723 Sly00499725 Sly00513304 Sly00499724
Solyc10g052580.2.1	Sly00510490 Sly00510491
Solyc10g085555.1.1	Sly00499734 Sly00513309 Sly00513310 Sly00513322 Sly00513315 Sly00513318 Sly00513317 Sly00513311 Sly00513312 Sly00513320 Sly00513316 Sly00513321 Sly00513328
Solyc10g085490.2.1	Sly00520754 Sly00520757 Sly00505220 Sly00520755 Sly00505221
Solyc10g085570.3.1	Sly00513329 Sly00513330 Sly00499749 Sly00513334 Sly00513338 Sly00513333 Sly00499745 Sly00513337 Sly00499743 Sly00513331 Sly00513335 Sly00499753 Sly00499754 Sly00499752 Sly00513332
Solyc10g085560.2.1	Sly00520761 Sly00520766 Sly00520764 Sly00520765 Sly00505225 Sly00520763 Sly00520768
Solyc10g085580.2.1	Sly00513341 Sly00513342 Sly00513345 Sly00513344 Sly00513343
Solyc10g052660.3.1	Sly00502990 Sly00517665
Solyc10g085330.2.1	Sly00499688 Sly00499686 Sly00499687 Sly00499684 Sly00513245 Sly00513231 Sly00499689 Sly00513235 Sly00513244 Sly00513242 Sly00499683 Sly00513232 Sly00513238 Sly00513237 Sly00513250 Sly00513255 Sly00513251 Sly00499685 Sly00513249 Sly00499690 Sly00513254
Solyc10g085335.1.1	Sly00513247 Sly00513239 Sly00513243 Sly00513248 Sly00513258 Sly00513253 Sly00513256
Solyc10g052640.2.1	Sly00517656 Sly00517659 Sly00517660 Sly00517661
Solyc10g085410.2.1	Sly00513268 Sly00513270 Sly00513269 Sly00513271 Sly00499705 Sly00513272 Sly00499706 Sly00499707 Sly00513277 Sly00513273 Sly00513275 Sly00499708 Sly00499709 Sly00513276 Sly00513274
Solyc10g085430.2.1	Sly00513281 Sly00513284 Sly00499710 Sly00513283 Sly00513286 Sly00499716 Sly00513287 Sly00499713 Sly00499715 Sly00513285 Sly00513289 Sly00513288 Sly00513298 Sly00499717 Sly00513301 Sly00513278 Sly00513296 Sly00513297 Sly00513295 Sly00513293 Sly00513290 Sly00513292
Solyc10g085460.2.1	Sly00520744 Sly00520745 Sly00520747 Sly00505215 Sly00520751 Sly00520749 Sly00520748 Sly00505212 Sly00505211
Solyc10g085450.2.1	Sly00520736 Sly00520737 Sly00520738 Sly00520739 Sly00520741 Sly00520742 Sly00505200 Sly00520740 Sly00520743
Solyc10g085360.2.1	Sly00513263 Sly00513264 Sly00513265 Sly00499695
Solyc10g052650.2.1	Sly00510499 Sly00510501 Sly00510502 Sly00510506 Sly00510504 Sly00510500 Sly00495409 Sly00510509 Sly00495408 Sly00510503
Solyc10g052745.1.1	Sly00517673 Sly00517675 Sly00517674 Sly00517676 Sly00517686 Sly00517677 Sly00517678 Sly00517679 Sly00517699 Sly00517682 Sly00503005 Sly00517685 Sly00517689 Sly00517691 Sly00517697 Sly00517680 Sly00510518 Sly00503004 Sly00517704 Sly00517688 Sly00517681 Sly00517703 Sly00517702 Sly00517693 Sly00510520 Sly00517683 Sly00517690 Sly00517700 Sly00517692 Sly00517694 Sly00517701
Solyc10g085320.2.1	Sly00499681 Sly00499682 Sly00513230
Solyc10g085230.2.1	Sly00499663 Sly00499662 Sly00513208 Sly00513209 Sly00499664 Sly00499665 Sly00513210
Solyc10g085280.1.1	Sly00513212 Sly00513216 Sly00513217 Sly00499670 Sly00513218
Solyc10g085290.2.1	Sly00513219 Sly00499673 Sly00513220 Sly00513224 Sly00499674 Sly00513221 Sly00513223 Sly00513226 Sly00513227
Solyc10g085140.1.1	Sly00520696 Sly00505176
Solyc10g085150.2.1	Sly00520699 Sly00520701 Sly00520700 Sly00520704 Sly00520702 Sly00505180 Sly00520703 Sly00505178
Solyc10g085160.2.1	Sly00520706 Sly00520712 Sly00520707 Sly00520709 Sly00505185 Sly00505184 Sly00520708 Sly00505183 Sly00505186 Sly00505187 Sly00520711 Sly00520710 Sly00520713 Sly00520714
Solyc10g085170.2.1	Sly00499633 Sly00513180 Sly00499634 Sly00513181
Solyc10g085200.2.1	Sly00513187 Sly00513185 Sly00513191 Sly00499644 Sly00513186 Sly00513192
Solyc10g085220.2.1	Sly00499654 Sly00499656 Sly00499658 Sly00499657
Solyc10g085225.1.1	Sly00499655 Sly00513198 Sly00513199 Sly00513204 Sly00513200 Sly00513201 Sly00513205 Sly00499660
Solyc10g051220.2.1	Sly00494979 Sly00494978 Sly00494980 Sly00494981
Solyc10g051210.1.1	Sly00510382 Sly00494974
Solyc10g051270.2.1	Sly00502934 Sly00517612 Sly00517611 Sly00502932 Sly00517606 Sly00502936 Sly00502933 Sly00517610 Sly00517613 Sly00517608 Sly00517614 Sly00502935
Solyc10g085070.2.1	Sly00513162 Sly00513164 Sly00513163 Sly00499611 Sly00513167 Sly00513166 Sly00513165
Solyc09g011935.1.1	Sly00502943 Sly00437135 Sly00462827
Solyc10g085050.2.1	Sly00520663 Sly00520664 Sly00520665 Sly00520666 Sly00520670 Sly00499583 Sly00505161 Sly00499581 Sly00520667 Sly00520671 Sly00520669 Sly00520668 Sly00520672 Sly00520674 Sly00520673 Sly00520675 Sly00499585 Sly00505164 Sly00505165
Solyc10g051200.2.1	Sly00517600 Sly00517603 Sly00517602 Sly00502928 Sly00502926 Sly00502930 Sly00502929 Sly00517601
Solyc10g051225.1.1	Sly00510389 Sly00510390 Sly00510392 Sly00510397 Sly00510391 Sly00510393 Sly00510398 Sly00510396
Solyc10g085060.2.1	Sly00499602 Sly00513149 Sly00513150 Sly00513152 Sly00513155 Sly00513158 Sly00513153 Sly00513151 Sly00513154 Sly00499599
Solyc10g085090.2.1	Sly00513178 Sly00513177 Sly00499622
Solyc10g085100.2.1	Sly00520681 Sly00520683 Sly00520682
Solyc10g049800.2.1	Sly00502699 Sly00517139 Sly00517141 Sly00517144 Sly00517143 Sly00517145 Sly00502701 Sly00517148 Sly00517142
Solyc10g085075.1.1	Sly00513169 Sly00513172 Sly00513173 Sly00513170 Sly00513174 Sly00513175
Solyc10g085080.2.1	Sly00520676 Sly00520677 Sly00520679 Sly00505166
Solyc10g049850.2.1	Sly00509986 Sly00509985 Sly00509983 Sly00509981 Sly00509987 Sly00509993 Sly00509984 Sly00493700 Sly00509992 Sly00509995 Sly00509982 Sly00509994
Solyc10g085130.2.1	Sly00505173 Sly00520686 Sly00520691 Sly00520687 Sly00520689 Sly00520690 Sly00505174 Sly00520688 Sly00520692 Sly00520693
Solyc10g051340.2.1	Sly00517628 Sly00517629 Sly00502956 Sly00517632 Sly00517631 Sly00517637 Sly00517633
Solyc10g084930.2.1	Sly00499542 Sly00513106 Sly00499540 Sly00513100 Sly00513099 Sly00499539 Sly00513098 Sly00499543 Sly00513101 Sly00513109 Sly00513097 Sly00513102 Sly00513103
Solyc10g084950.2.1	Sly00505139 Sly00520650 Sly00505140
Solyc10g049750.2.1	Sly00493571 Sly00509941 Sly00493575 Sly00509942 Sly00493573 Sly00493576
Solyc10g084970.2.1	Sly00513112 Sly00513117 Sly00513116 Sly00513113 Sly00513118 Sly00513114 Sly00513115 Sly00499556 Sly00513119
Solyc10g084990.2.1	Sly00513124 Sly00513126 Sly00513125 Sly00513133 Sly00513128 Sly00513131 Sly00513129 Sly00513134 Sly00499562
Solyc10g084980.2.1	Sly00520656 Sly00520657
Solyc10g085010.2.1	Sly00505143 Sly00505142 Sly00520660 Sly00520659 Sly00505148 Sly00505144
Solyc10g085020.2.1	Sly00520661 Sly00520662
Solyc10g085000.2.1	Sly00499563 Sly00513141 Sly00513142 Sly00513144 Sly00499567
Solyc10g085030.1.1	Sly00499570 Sly00499573
Solyc10g049820.2.1	Sly00509961 Sly00509962 Sly00509964 Sly00509960 Sly00493654 Sly00493655 Sly00493657 Sly00509963 Sly00493656 Sly00509969 Sly00493665 Sly00493666 Sly00509965 Sly00493667
Solyc10g049780.1.1	Sly00509957 Sly00509958
Solyc10g051390.2.1	Sly00495078 Sly00495079 Sly00495080 Sly00510427 Sly00495087 Sly00495091 Sly00510428 Sly00510431 Sly00510433 Sly00495081 Sly00510430 Sly00510432 Sly00510435 Sly00510434 Sly00510429 Sly00495083
Solyc10g051380.2.1	Sly00495051 Sly00495053 Sly00495057 Sly00510418 Sly00510419 Sly00510421 Sly00495055 Sly00510422 Sly00510420 Sly00495054 Sly00495052 Sly00510424 Sly00510425 Sly00510423
Solyc10g084870.1.1	Sly00513094 Sly00499528
Solyc10g084800.2.1	Sly00513087 Sly00513083 Sly00513085 Sly00499514 Sly00513088 Sly00513086 Sly00513089 Sly00499512
Solyc10g084840.2.1	Sly00520597 Sly00520599 Sly00520603 Sly00520602 Sly00505108 Sly00520598 Sly00520605 Sly00520600 Sly00520601 Sly00520604 Sly00520606
Solyc10g084830.2.1	Sly00520592 Sly00520594 Sly00520595
Solyc10g049720.2.1	Sly00493557 Sly00509928 Sly00493556
Solyc10g084940.2.1	Sly00520640 Sly00520642 Sly00520641 Sly00520644 Sly00505135 Sly00520645
Solyc10g049710.2.1	Sly00493531 Sly00493536 Sly00493533 Sly00493532
Solyc10g084920.2.1	Sly00520628 Sly00520629 Sly00520630 Sly00505134 Sly00520632 Sly00520635 Sly00505133 Sly00520631 Sly00520636 Sly00520633
Solyc10g084860.1.1	Sly00505119 Sly00520617 Sly00520618 Sly00520619
Solyc10g084900.1.1	Sly00520622
Solyc10g084650.2.1	Sly00520470 Sly00520473 Sly00520475 Sly00520489 Sly00520496 Sly00520477 Sly00520482 Sly00520476 Sly00520485 Sly00520474 Sly00520497 Sly00505078 Sly00520490 Sly00520493 Sly00520478 Sly00520483 Sly00520494
Solyc10g084730.2.1	Sly00520500 Sly00505083 Sly00520501
Solyc10g084700.2.1	Sly00513056 Sly00513057 Sly00513060 Sly00499487 Sly00513059 Sly00513058
Solyc10g049620.2.1	Sly00493485 Sly00509917 Sly00509918
Solyc10g049660.2.1	Sly00502681 Sly00517112
Solyc10g084740.2.1	Sly00520503 Sly00520506 Sly00520509 Sly00505085 Sly00520507 Sly00505088 Sly00520513 Sly00520510 Sly00520514 Sly00520512 Sly00505084 Sly00520516 Sly00520515
Solyc10g049640.2.1	Sly00502677 Sly00517101 Sly00517102 Sly00517103
Solyc10g084750.1.1	Sly00499494 Sly00499495
Solyc10g049630.2.1	Sly00517097 Sly00502674 Sly00502675 Sly00517096 Sly00502676 Sly00502672 Sly00517098
Solyc10g084760.2.1	Sly00520525 Sly00520526 Sly00520529 Sly00520531 Sly00520533 Sly00520528 Sly00520532 Sly00520534 Sly00520539 Sly00505094 Sly00520530 Sly00520537 Sly00505095 Sly00520527 Sly00520536 Sly00520544 Sly00520538 Sly00520541 Sly00520558 Sly00505096 Sly00520547 Sly00520552 Sly00520565 Sly00520567 Sly00520543 Sly00520548 Sly00520569
Solyc10g084770.2.1	Sly00513066 Sly00513068 Sly00513067 Sly00499499 Sly00513071 Sly00513069 Sly00513074 Sly00513075 Sly00513070 Sly00513073 Sly00499497 Sly00513072 Sly00513076 Sly00513077 Sly00513079
Solyc10g050210.2.1	Sly00517280 Sly00517279 Sly00517282 Sly00517281 Sly00517283 Sly00517285 Sly00517284
Solyc10g084670.2.1	Sly00513022 Sly00513023 Sly00513021 Sly00513026 Sly00513030 Sly00513039 Sly00513020 Sly00513024 Sly00513036 Sly00513052 Sly00513045
Solyc10g084660.2.1	Sly00499472 Sly00499473 Sly00499474
Solyc10g084690.2.1	Sly00499484 Sly00499485 Sly00513053
Solyc11g013320.2.1	Sly00517254 Sly00529414 Sly00502744 Sly00549149
Solyc10g084560.2.1	Sly00505063 Sly00505065 Sly00505064
Solyc10g050170.2.1	Sly00517259 Sly00517263 Sly00517260 Sly00517262 Sly00517261 Sly00517264 Sly00517270 Sly00517272 Sly00502758 Sly00517267
Solyc10g050095.1.1	Sly00510054 Sly00510055 Sly00510056 Sly00510057
Solyc10g050110.1.1	Sly00493944 Sly00493945
Solyc10g087010.2.1	Sly00512987 Sly00512988 Sly00512990 Sly00512989 Sly00512994 Sly00505068 Sly00505069 Sly00512991 Sly00512992 Sly00512995
Solyc10g087013.1.1	Sly00499445 Sly00499447
Solyc10g084540.2.1	Sly00512971 Sly00499432 Sly00512969 Sly00512975 Sly00512970 Sly00512978 Sly00499434 Sly00512974 Sly00512972 Sly00512980
Solyc10g050060.2.1	Sly00517222 Sly00517223 Sly00517225 Sly00517226 Sly00517232 Sly00517230 Sly00502735 Sly00517227 Sly00517233 Sly00517224 Sly00517228 Sly00517231 Sly00517229 Sly00502736 Sly00517236 Sly00517234 Sly00517235 Sly00502734 Sly00502737 Sly00502733 Sly00502740 Sly00502738 Sly00502739 Sly00517238 Sly00517237
Solyc10g084440.2.1	Sly00499414 Sly00512962 Sly00512961 Sly00512960
Solyc10g084380.1.1	Sly00499405 Sly00512946 Sly00512950 Sly00512942 Sly00512941 Sly00512954 Sly00512945 Sly00512948 Sly00512958 Sly00512957 Sly00499407 Sly00512955 Sly00512943
Solyc10g084400.2.1	Sly00505046 Sly00520445 Sly00520448 Sly00520446 Sly00520447
Solyc10g084350.2.1	Sly00520426 Sly00520427 Sly00520428 Sly00520429 Sly00520430 Sly00505032
Solyc10g084370.2.1	Sly00520437 Sly00520431 Sly00520432 Sly00520433 Sly00505041 Sly00505043 Sly00505045 Sly00520436
Solyc10g050063.1.1	Sly00510041 Sly00510043 Sly00510044
Solyc10g084310.2.1	Sly00499375 Sly00499373 Sly00499374 Sly00499378 Sly00499372 Sly00512930
Solyc10g084325.1.1	Sly00512932 Sly00512933 Sly00499394 Sly00512935 Sly00512934
Solyc10g084330.1.1	Sly00520418
Solyc10g050050.1.1	Sly00517219 Sly00517220
Solyc10g084340.2.1	Sly00520420 Sly00520422 Sly00520423
Solyc10g051140.2.1	Sly00517552 Sly00517553 Sly00517557 Sly00517559 Sly00517564 Sly00517554 Sly00517555 Sly00517566 Sly00517567 Sly00517571 Sly00517551 Sly00517569 Sly00517574 Sly00517568 Sly00517570 Sly00517556 Sly00517576 Sly00517583 Sly00517560 Sly00517572 Sly00517579 Sly00517563
Solyc10g049920.2.1	Sly00517180 Sly00517179 Sly00517183 Sly00517186 Sly00517189 Sly00502714 Sly00517206 Sly00517181 Sly00517192 Sly00517182 Sly00502720 Sly00517190 Sly00517207 Sly00517185 Sly00517184 Sly00517193 Sly00517198 Sly00502717 Sly00517197 Sly00502716 Sly00517191 Sly00502719 Sly00517195 Sly00517208 Sly00517200 Sly00517187 Sly00517202 Sly00502715 Sly00517203 Sly00517199 Sly00517201 Sly00517204 Sly00502718 Sly…
Solyc10g049890.2.1	Sly00493741 Sly00510001 Sly00510002 Sly00510003
Solyc10g051130.2.1	Sly00502918 Sly00517539 Sly00517540 Sly00517541 Sly00517547 Sly00517545
Solyc10g051090.2.1	Sly00494913 Sly00510368 Sly00510367
Solyc10g050325.1.1	Sly00510131 Sly00510132 Sly00510135 Sly00510136 Sly00510138 Sly00510139 Sly00510137
Solyc10g050280.1.1	Sly00517294 Sly00517295
Solyc10g050230.2.1	Sly00510090 Sly00510092 Sly00510093 Sly00510091 Sly00494051 Sly00494053 Sly00494055
Solyc10g086450.1.1	Sly00499998 Sly00513478
Solyc10g086430.2.1	Sly00513474 Sly00499994 Sly00513473 Sly00513475 Sly00513476
Solyc10g086390.2.1	Sly00521115 Sly00521116 Sly00521117 Sly00505409 Sly00505408
Solyc10g086360.2.1	Sly00499967 Sly00499969 Sly00513456 Sly00513461 Sly00513458 Sly00513457 Sly00513464 Sly00513460
Solyc10g086370.1.1	Sly00499970 Sly00513462 Sly00513459 Sly00513468
Solyc10g086410.3.1	Sly00513467 Sly00499985 Sly00499984 Sly00499983
Solyc10g086400.2.1	Sly00513469 Sly00499980 Sly00499981 Sly00499982
Solyc10g086420.1.1	Sly00521120 Sly00505413 Sly00505412 Sly00521121
Solyc10g086290.2.1	Sly00513450 Sly00513451 Sly00513452 Sly00513453 Sly00499951 Sly00499950
Solyc10g086320.2.1	Sly00521085 Sly00521086 Sly00521095 Sly00521087 Sly00521091 Sly00521093 Sly00521092 Sly00521096 Sly00521094
Solyc10g086335.1.1	Sly00499960 Sly00499962 Sly00513454 Sly00499961
Solyc10g086180.2.1	Sly00513441 Sly00499910 Sly00513442 Sly00499912 Sly00499911
Solyc10g086190.2.1	Sly00513443 Sly00499925 Sly00513445 Sly00513447 Sly00513444 Sly00513448 Sly00513446
Solyc10g086260.2.1	Sly00521079 Sly00521080
Solyc10g086270.2.1	Sly00505393 Sly00521082 Sly00521081
Solyc10g086210.2.1	Sly00505372 Sly00521060 Sly00505370 Sly00521063 Sly00521064
Solyc10g086160.1.1	Sly00513439 Sly00513440
Solyc10g086070.2.1	Sly00513434 Sly00513435 Sly00513431 Sly00513436 Sly00513437 Sly00513432 Sly00513433 Sly00513438
Solyc10g086130.2.1	Sly00505352 Sly00521054
Solyc10g086060.2.1	Sly00521017 Sly00521018 Sly00521029 Sly00521016 Sly00521021 Sly00521020 Sly00521030 Sly00521019 Sly00521022
Solyc10g086080.2.1	Sly00505347 Sly00521036
Solyc10g085980.2.1	Sly00513416 Sly00513420 Sly00499870 Sly00499866 Sly00513419 Sly00513422 Sly00499871 Sly00499872 Sly00513418 Sly00513421 Sly00499873 Sly00499865 Sly00499868 Sly00513417 Sly00499867 Sly00520962 Sly00499869 Sly00513429 Sly00513428 Sly00513426 Sly00513427 Sly00513424 Sly00513425 Sly00513423
Solyc10g085990.2.1	Sly00520963 Sly00520965 Sly00520974 Sly00520964 Sly00520967 Sly00520972 Sly00505320 Sly00505321 Sly00520966 Sly00505322 Sly00505323 Sly00520973 Sly00520976 Sly00520977 Sly00520970
Solyc10g086000.2.1	Sly00520971 Sly00520980 Sly00520981 Sly00520987 Sly00520985 Sly00505327 Sly00505326 Sly00520982 Sly00520992 Sly00520993 Sly00520989 Sly00520999 Sly00520988
Solyc10g086030.2.1	Sly00521003 Sly00521005 Sly00521006 Sly00521007 Sly00521008 Sly00521009 Sly00505335 Sly00521010 Sly00521011 Sly00521012 Sly00521004 Sly00505333 Sly00505334
Solyc10g085920.2.1	Sly00520902 Sly00520906 Sly00520908 Sly00520905 Sly00505304 Sly00520913
Solyc10g085930.2.1	Sly00520907 Sly00520917 Sly00520955 Sly00520924 Sly00520931 Sly00520946 Sly00520929 Sly00520934 Sly00520916 Sly00520928 Sly00520927 Sly00520922 Sly00520930 Sly00520920 Sly00520937 Sly00520942 Sly00505310 Sly00520944 Sly00505305 Sly00520915 Sly00520932 Sly00520919 Sly00520941 Sly00520926 Sly00520925 Sly00520918 Sly00520943 Sly00520921 Sly00505311 Sly00505315 Sly00505314 Sly00505307 Sly00505306 Sly…
Solyc10g085910.2.1	Sly00499834 Sly00520893 Sly00505303 Sly00505302 Sly00520894 Sly00520895
Solyc10g085870.1.1	Sly00499841 Sly00499843 Sly00513406
Solyc10g085880.1.1	Sly00499848 Sly00505290 Sly00520891 Sly00513407 Sly00505288
Solyc10g085900.2.1	Sly00513409 Sly00499853 Sly00513410
Solyc10g085860.1.1	Sly00520888 Sly00520889 Sly00505287
Solyc10g085820.2.1	Sly00520885 Sly00520886 Sly00505259 Sly00499829
Solyc10g085790.2.1	Sly00499818 Sly00499819 Sly00513401 Sly00499822 Sly00513396
Solyc10g047900.2.1	Sly00502550 Sly00516939 Sly00516940
Solyc10g076610.2.1	Sly00518413 Sly00518414 Sly00518415 Sly00518416 Sly00503687
Solyc10g076590.2.1	Sly00511322 Sly00511321 Sly00497200 Sly00497202 Sly00511329 Sly00497201 Sly00511323 Sly00511341 Sly00511339 Sly00511338 Sly00511331 Sly00511343 Sly00511342
Solyc10g076650.2.1	Sly00518420 Sly00503690
Solyc10g085710.2.1	Sly00520847 Sly00505249 Sly00520849 Sly00520852 Sly00520850 Sly00520851 Sly00505250 Sly00520854 Sly00505251 Sly00505252 Sly00499791
Solyc10g085730.2.1	Sly00499800 Sly00513390 Sly00513391
Solyc10g047910.1.1	Sly00509652 Sly00509655
Solyc10g076660.2.1	Sly00497217 Sly00511359
Solyc10g076670.2.1	Sly00511362 Sly00497229
Solyc10g085750.2.1	Sly00520859 Sly00505256
Solyc10g076690.2.1	Sly00518423 Sly00518427 Sly00518422 Sly00518426 Sly00518424 Sly00518425 Sly00503694 Sly00503693 Sly00503691 Sly00518428
Solyc10g076710.2.1	Sly00518437 Sly00518439 Sly00518440 Sly00518438 Sly00518443 Sly00518446
Solyc10g085680.2.1	Sly00505246 Sly00520843 Sly00520842 Sly00520844 Sly00520845 Sly00505247
Solyc10g085690.2.1	Sly00499788 Sly00499789 Sly00513377 Sly00513379
Solyc10g085720.2.1	Sly00513382 Sly00499795 Sly00513388 Sly00513385 Sly00499797
Solyc10g047827.1.1	Sly00516937 Sly00516938
Solyc10g085665.1.1	Sly00513374 Sly00513375
Solyc10g085660.2.1	Sly00520815 Sly00520816 Sly00520820 Sly00520814 Sly00520819 Sly00520817 Sly00520818 Sly00520822 Sly00505241
Solyc10g085670.2.1	Sly00520823 Sly00520824 Sly00520825 Sly00520837 Sly00520835 Sly00520838 Sly00520834 Sly00520836 Sly00520839 Sly00520831 Sly00520829 Sly00520832 Sly00520826
Solyc10g085620.2.1	Sly00520795 Sly00520796 Sly00520797 Sly00520798 Sly00520803 Sly00520807 Sly00505239 Sly00520802 Sly00520806 Sly00520808 Sly00520811 Sly00520805 Sly00520809
Solyc10g085640.1.1	Sly00513372 Sly00499782 Sly00499783 Sly00499781
Solyc10g085590.1.1	Sly00499756 Sly00499757 Sly00513349 Sly00499760 Sly00513352 Sly00513350 Sly00513351 Sly00499762
Solyc10g085610.2.1	Sly00520781 Sly00520782 Sly00520784 Sly00520789 Sly00520785 Sly00520791 Sly00520788 Sly00520790
Solyc10g085600.2.1	Sly00505231 Sly00505235 Sly00520771 Sly00520773 Sly00520770 Sly00520774 Sly00520777 Sly00520776 Sly00505233
Solyc10g008730.3.1	Sly00500999 Sly00501000
Solyc10g008750.3.1	Sly00501005 Sly00501003 Sly00501004 Sly00515076
Solyc10g008770.3.1	Sly00515077 Sly00515079 Sly00515078 Sly00515080
Solyc10g008640.3.1	Sly00515037 Sly00515038 Sly00515041 Sly00500989 Sly00500990 Sly00515043 Sly00515042 Sly00515044 Sly00500988 Sly00515047 Sly00515045 Sly00515049 Sly00515046 Sly00515050 Sly00515048
Solyc10g008710.3.1	Sly00500994 Sly00515060 Sly00515062 Sly00515057
Solyc10g008630.3.1	Sly00506628 Sly00506629 Sly00482999 Sly00483000 Sly00483004 Sly00483002
Solyc10g008850.2.1	Sly00515118 Sly00501025 Sly00515119
Solyc10g008790.3.1	Sly00515083 Sly00515087 Sly00501014 Sly00515090 Sly00515091 Sly00515098 Sly00515088 Sly00501016 Sly00515093 Sly00515092 Sly00515096 Sly00515095 Sly00515094 Sly00515097 Sly00515089 Sly00501013 Sly00515084 Sly00501012 Sly00501015 Sly00515082 Sly00515099
Solyc10g008740.3.1	Sly00483038 Sly00483039 Sly00483040
Solyc10g008830.2.1	Sly00515115 Sly00501023 Sly00515116 Sly00501024
Solyc10g009150.3.1	Sly00483259 Sly00483260 Sly00506777 Sly00506776 Sly00506778
Solyc10g009100.2.1	Sly00506773 Sly00515232 Sly00515236 Sly00515238 Sly00515242 Sly00515234 Sly00515237 Sly00515239 Sly00515233 Sly00515235 Sly00515240 Sly00515241 Sly00515244 Sly00515243 Sly00515245 Sly00515246 Sly00515247
Solyc10g009180.3.1	Sly00506808 Sly00506809 Sly00483289 Sly00506810 Sly00506811 Sly00483288 Sly00506816 Sly00506813
Solyc10g009190.1.1	Sly00506819 Sly00515262 Sly00506820 Sly00515263
Solyc10g009140.3.1	Sly00501063 Sly00515256 Sly00515259 Sly00515258 Sly00515260
Solyc10g009170.2.1	Sly00506794 Sly00483286 Sly00506793 Sly00506799 Sly00506801 Sly00483284 Sly00506802 Sly00506805 Sly00506803 Sly00483285
Solyc10g009160.3.1	Sly00506779 Sly00483275 Sly00506782 Sly00506786 Sly00506784 Sly00506785 Sly00506783 Sly00483279 Sly00483278
Solyc10g009210.3.1	Sly00506822 Sly00506824 Sly00506823 Sly00506833 Sly00483305 Sly00506841 Sly00483300 Sly00506829 Sly00506831 Sly00483298 Sly00483299 Sly00506827 Sly00506828 Sly00506832 Sly00506826 Sly00506838 Sly00506825 Sly00506836 Sly00506840 Sly00506849 Sly00483296 Sly00483306 Sly00506842 Sly00506839 Sly00506843 Sly00506844 Sly00506845 Sly00506848 Sly00506846 Sly00506834 Sly00506847
Solyc10g009200.3.1	Sly00483294
Solyc10g009220.3.1	Sly00483309 Sly00506854 Sly00506855 Sly00506857 Sly00506860 Sly00483310 Sly00483311
Solyc10g009280.3.1	Sly00515268 Sly00515270 Sly00501078 Sly00515269 Sly00515272 Sly00515271 Sly00501077
Solyc10g009290.1.1	Sly00501079 Sly00515277
Solyc10g009000.3.1	Sly00506724 Sly00506725 Sly00506732 Sly00506733 Sly00506730 Sly00506739 Sly00506737 Sly00483180 Sly00483177
Solyc10g008990.3.1	Sly00506672 Sly00506673 Sly00506678 Sly00506679 Sly00506674 Sly00506683 Sly00506691 Sly00506692 Sly00506695 Sly00506676 Sly00506680 Sly00506693 Sly00506699 Sly00506700 Sly00506712 Sly00506720 Sly00506714 Sly00483168
Solyc10g008980.3.1	Sly00483158 Sly00506666 Sly00506668 Sly00506667 Sly00506664 Sly00483159 Sly00506669 Sly00483161 Sly00483162 Sly00506671 Sly00506663 Sly00506665
Solyc10g008950.3.1	Sly00506660 Sly00506661 Sly00483150 Sly00483151
Solyc10g008930.1.1	Sly00483137 Sly00483139 Sly00483138
Solyc10g008920.1.1	Sly00483131 Sly00506658
Solyc10g009020.3.1	Sly00483185 Sly00506753 Sly00506750 Sly00506754 Sly00506752 Sly00483184
Solyc10g009050.3.1	Sly00515186 Sly00515187 Sly00515188 Sly00515189 Sly00515192 Sly00515195 Sly00515193 Sly00515203 Sly00515202 Sly00515201 Sly00515200 Sly00515199 Sly00515196 Sly00501047 Sly00515214 Sly00515208 Sly00515207 Sly00515205
Solyc10g009070.3.1	Sly00501051 Sly00515218
Solyc10g009060.1.1	Sly00483194 Sly00483195 Sly00506767
Solyc10g009040.3.1	Sly00515158 Sly00515161 Sly00515162 Sly00515164 Sly00515160 Sly00515159 Sly00515165 Sly00501045 Sly00501044
Solyc10g008880.3.1	Sly00515126 Sly00515128 Sly00515127 Sly00515125 Sly00515130 Sly00501030
Solyc10g008890.3.1	Sly00515139 Sly00515140 Sly00501036 Sly00515141 Sly00515142 Sly00501037
Solyc10g009080.3.1	Sly00483206 Sly00506769 Sly00483207
Solyc10g009090.3.1	Sly00515220 Sly00515221 Sly00515223 Sly00501057 Sly00515228 Sly00515226 Sly00515224
Solyc10g008470.3.1	Sly00482934 Sly00506574 Sly00506579 Sly00482927 Sly00506573 Sly00506578 Sly00506575 Sly00482923 Sly00482929 Sly00506577 Sly00506585 Sly00482925 Sly00506576 Sly00506580 Sly00482931
Solyc10g008460.3.1	Sly00482917 Sly00506554 Sly00506561 Sly00506560 Sly00506556 Sly00506555 Sly00506559 Sly00506557 Sly00506563 Sly00506558 Sly00482919 Sly00482918 Sly00506568 Sly00506569
Solyc10g008450.1.1	Sly00506552 Sly00506553 Sly00482911 Sly00482912
Solyc10g076570.2.1	Sly00518402 Sly00518401 Sly00503681 Sly00518403 Sly00503682
Solyc10g076520.2.1	Sly00511316
Solyc10g076530.2.1	Sly00518379 Sly00518380 Sly00518382 Sly00497190 Sly00497192 Sly00518383 Sly00503676 Sly00497191 Sly00518381 Sly00518384 Sly00497193
Solyc10g076550.1.1	Sly00518391 Sly00518387
Solyc10g076560.1.1	Sly00518393 Sly00518394
Solyc10g076510.2.1	Sly00518371 Sly00518374 Sly00518375 Sly00518377 Sly00518373 Sly00518372 Sly00518376 Sly00503674 Sly00503675
Solyc10g076500.2.1	Sly00518366 Sly00518369
Solyc10g076490.1.1	Sly00518367
Solyc10g008410.1.1	Sly00482902 Sly00482903
Solyc10g008400.1.1	Sly00514989 Sly00482897 Sly00482898
Solyc10g008350.3.1	Sly00482876 Sly00482877 Sly00506541
Solyc10g008340.3.1	Sly00500960 Sly00514983 Sly00514985 Sly00514984 Sly00514986
Solyc10g008300.3.1	Sly00500938 Sly00500941 Sly00500939 Sly00500945 Sly00514970 Sly00500942 Sly00500943 Sly00514969
Solyc10g008310.1.1	Sly00500949 Sly00514980
Solyc10g008320.1.1	Sly00514979 Sly00500955 Sly00500950
Solyc10g048065.1.1	Sly00509692 Sly00509710 Sly00509711
Solyc10g048060.1.1	Sly00509707 Sly00516985 Sly00516986 Sly00516987
Solyc10g008280.3.1	Sly00514963 Sly00514962 Sly00500937 Sly00514964 Sly00514966 Sly00514965
Solyc10g008270.3.1	Sly00500936 Sly00500935
Solyc10g008260.2.1	Sly00514957 Sly00514959
Solyc10g076400.2.1	Sly00518354 Sly00518355 Sly00518356 Sly00518357
Solyc10g076380.2.1	Sly00511302 Sly00511301 Sly00497148 Sly00497150
Solyc10g076357.1.1	Sly00518347 Sly00518348 Sly00518350
Solyc10g048030.2.1	Sly00502575 Sly00502579
Solyc10g076340.2.1	Sly00511282 Sly00511281 Sly00497116 Sly00497114
Solyc10g076370.2.1	Sly00511296 Sly00511298 Sly00511297 Sly00497142 Sly00497141
Solyc10g076305.1.1	Sly00518346
Solyc10g008210.3.1	Sly00506460 Sly00506461 Sly00506467 Sly00506465 Sly00506472 Sly00506463 Sly00506464 Sly00506462 Sly00506471 Sly00506474
Solyc10g008240.3.1	Sly00506477 Sly00506476 Sly00506479 Sly00506481 Sly00506484 Sly00482818 Sly00506487 Sly00482821 Sly00506497 Sly00506505 Sly00506480 Sly00506488 Sly00506489 Sly00482828 Sly00506527 Sly00506482 Sly00482822 Sly00506493 Sly00482832 Sly00482830 Sly00482833 Sly00506512 Sly00506490 Sly00482823 Sly00482829 Sly00506496 Sly00482824 Sly00482820 Sly00482827 Sly00506520 Sly00506518 Sly00506509 Sly00482844 Sly…
Solyc10g008220.3.1	Sly00506478 Sly00506491 Sly00506498 Sly00506502 Sly00506483 Sly00482831 Sly00482834 Sly00506485 Sly00506492 Sly00506501 Sly00506504 Sly00482819 Sly00506500 Sly00506510
Solyc10g008230.2.1	Sly00482826 Sly00482839 Sly00482835 Sly00482836 Sly00506517 Sly00506516 Sly00506514 Sly00506521 Sly00506524 Sly00506525 Sly00506522 Sly00506503
Solyc10g008190.3.1	Sly00514926
Solyc10g008200.3.1	Sly00514929 Sly00514928 Sly00514935 Sly00514931 Sly00514932 Sly00514940 Sly00514939 Sly00514934
Solyc10g008170.3.1	Sly00482810 Sly00506456
Solyc10g008180.2.1	Sly00482809 Sly00506458 Sly00482814 Sly00506459
Solyc10g008250.2.1	Sly00500933 Sly00514955
Solyc10g008245.1.1	Sly00506531 Sly00506532
Solyc10g047960.2.1	Sly00516948 Sly00516955 Sly00516957 Sly00516961 Sly00516954 Sly00516962 Sly00516968 Sly00516969 Sly00516950 Sly00516949 Sly00516960 Sly00516951 Sly00516967 Sly00516964 Sly00516973 Sly00516959 Sly00516965 Sly00502573 Sly00516958 Sly00516972
Solyc10g008120.3.1	Sly00506430 Sly00482789 Sly00482788
Solyc10g008130.3.1	Sly00506432 Sly00506431 Sly00506436 Sly00506435 Sly00506434 Sly00506441 Sly00482796 Sly00506437
Solyc10g008160.3.1	Sly00482805 Sly00506452 Sly00506448 Sly00506449 Sly00506455 Sly00506450 Sly00506454
Solyc10g076420.2.1	Sly00497168 Sly00497169 Sly00497170
Solyc10g076460.2.1	Sly00497177 Sly00511310 Sly00511309 Sly00497178
Solyc10g008040.3.1	Sly00482771 Sly00506402 Sly00482772
Solyc10g008050.2.1	Sly00500919 Sly00514879
Solyc10g008060.3.1	Sly00514880 Sly00514881 Sly00514882 Sly00500921 Sly00514883 Sly00514885 Sly00514888 Sly00500920
Solyc10g008070.3.1	Sly00500924 Sly00514890 Sly00514892 Sly00514893 Sly00514894 Sly00514897 Sly00514891 Sly00514898 Sly00500925 Sly00514896 Sly00514895 Sly00500923 Sly00514902 Sly00514918 Sly00514910 Sly00514907 Sly00514904
Solyc10g008065.1.1	Sly00514899
Solyc10g008080.2.1	Sly00506404 Sly00506405
Solyc10g008100.3.1	Sly00514919 Sly00514920 Sly00514921 Sly00500927 Sly00514922
Solyc10g008110.3.1	Sly00506407 Sly00506408 Sly00506413 Sly00506420 Sly00506410 Sly00506416 Sly00506417 Sly00482780 Sly00506422 Sly00506414 Sly00506423 Sly00506418 Sly00506421
Solyc10g008610.1.1	Sly00515031 Sly00515032
Solyc10g008620.3.1	Sly00515034 Sly00515035 Sly00515036
Solyc10g008550.3.1	Sly00506618 Sly00506617 Sly00506624 Sly00506625
Solyc10g008560.3.1	Sly00515024 Sly00500977
Solyc10g008570.3.1	Sly00515026 Sly00515027 Sly00515028
Solyc10g008490.3.1	Sly00506588 Sly00506590 Sly00506592 Sly00506589 Sly00506591 Sly00506593
Solyc10g008480.3.1	Sly00514997 Sly00514996 Sly00514999 Sly00500970 Sly00515003 Sly00515004
Solyc10g008520.3.1	Sly00482965 Sly00506608 Sly00506609 Sly00482969 Sly00482967
Solyc10g008510.2.1	Sly00506596 Sly00482949 Sly00482955 Sly00506601 Sly00506597 Sly00482947 Sly00482948 Sly00482950 Sly00482954 Sly00506598 Sly00482951 Sly00482953 Sly00506600
Solyc10g074740.1.1	Sly00511011 Sly00518174 Sly00518173 Sly00511016 Sly00518175
Solyc10g049450.2.1	Sly00502655 Sly00517047 Sly00509848
Solyc10g049480.1.1	Sly00493370 Sly00509851
Solyc10g074710.2.1	Sly00496777 Sly00511001 Sly00496778 Sly00511002 Sly00511003 Sly00496780
Solyc10g049470.1.1	Sly00509847 Sly00509849 Sly00493362
Solyc10g074720.2.1	Sly00496789 Sly00511008 Sly00496790 Sly00511007 Sly00496791
Solyc10g049360.2.1	Sly00517038 Sly00502640 Sly00502639
Solyc10g074690.2.1	Sly00518166 Sly00518167 Sly00503510 Sly00503511 Sly00518168 Sly00503509
Solyc10g049420.2.1	Sly00509837 Sly00509839
Solyc10g074850.2.1	Sly00511081 Sly00511083 Sly00511082 Sly00496869 Sly00496868
Solyc10g049370.2.1	Sly00509826 Sly00493262 Sly00493260 Sly00493261
Solyc10g074820.1.1	Sly00496849 Sly00511076 Sly00511078 Sly00511077 Sly00496852 Sly00496851
Solyc10g074810.2.1	Sly00511066 Sly00511074 Sly00511068 Sly00496845 Sly00496842 Sly00511075 Sly00511071 Sly00496844 Sly00496847
Solyc10g049330.2.1	Sly00517031 Sly00517032 Sly00517033
Solyc10g074790.2.1	Sly00511051 Sly00496829 Sly00496831 Sly00511053 Sly00496833 Sly00511056 Sly00496830 Sly00511054
Solyc10g074800.2.1	Sly00496836 Sly00511061 Sly00511062 Sly00511065 Sly00496839 Sly00496841
Solyc10g074745.1.1	Sly00511018 Sly00511029 Sly00511020 Sly00511024 Sly00503523 Sly00511022 Sly00511025 Sly00511023 Sly00511030 Sly00503522 Sly00511041 Sly00511035 Sly00511039 Sly00511038
Solyc10g049560.2.1	Sly00517083 Sly00502667 Sly00517084 Sly00502665
Solyc10g049570.2.1	Sly00509870 Sly00509874 Sly00493445 Sly00493446 Sly00509871
Solyc10g074650.2.1	Sly00496743 Sly00518153 Sly00496744 Sly00518159 Sly00518156 Sly00518157 Sly00503501 Sly00496749 Sly00518155
Solyc10g074630.2.1	Sly00510987 Sly00496747 Sly00496746 Sly00496748
Solyc10g049500.1.1	Sly00509857 Sly00493410
Solyc10g074560.2.1	Sly00510958 Sly00510959 Sly00510960 Sly00510961 Sly00496728 Sly00496729
Solyc10g074540.1.1	Sly00503477 Sly00503476 Sly00518133
Solyc10g074550.2.1	Sly00518134 Sly00518136
Solyc10g074620.2.1	Sly00496740 Sly00510984 Sly00510985
Solyc10g074590.2.1	Sly00518143 Sly00518145 Sly00518144 Sly00518146 Sly00518147 Sly00518149 Sly00503495
Solyc10g074610.2.1	Sly00503500 Sly00503499
Solyc10g074580.2.1	Sly00503489 Sly00503486 Sly00518138 Sly00503483 Sly00503490 Sly00503491 Sly00503487 Sly00503484 Sly00518139 Sly00518140 Sly00518141
Solyc10g049533.1.1	Sly00517057 Sly00517058 Sly00517067 Sly00517064 Sly00517065 Sly00517060 Sly00517062 Sly00517063 Sly00517068 Sly00517069 Sly00517059 Sly00517061 Sly00517066 Sly00517071 Sly00517072 Sly00517074 Sly00517070 Sly00517076 Sly00517073
Solyc10g074570.2.1	Sly00496733 Sly00510968 Sly00496734 Sly00510969 Sly00510971 Sly00510976 Sly00510978 Sly00510975 Sly00510977
Solyc10g086690.2.1	Sly00513535 Sly00513536 Sly00513537 Sly00513538 Sly00500076 Sly00513541 Sly00513542 Sly00513543 Sly00513544 Sly00513546 Sly00513548 Sly00513553 Sly00500085 Sly00513539 Sly00513549 Sly00500090 Sly00513547 Sly00513552 Sly00500087 Sly00513559 Sly00513540 Sly00500077 Sly00513551 Sly00500080 Sly00500089 Sly00513556 Sly00513562 Sly00513550 Sly00513554 Sly00500082 Sly00500083 Sly00513545 Sly00513555 Sly…
Solyc10g086700.2.1	Sly00505532
Solyc10g086710.2.1	Sly00505533 Sly00521194 Sly00521196 Sly00521198 Sly00521199 Sly00521195 Sly00521200 Sly00505534 Sly00521197 Sly00505535
Solyc10g075120.2.1	Sly00511170 Sly00511171
Solyc10g086720.2.1	Sly00513571 Sly00513572 Sly00513574 Sly00513573
Solyc10g086730.2.1	Sly00513576 Sly00500099 Sly00513577
Solyc10g075170.2.1	Sly00511174 Sly00511176 Sly00511177 Sly00496965 Sly00511175 Sly00511173 Sly00496968 Sly00496967 Sly00496970
Solyc10g086760.2.1	Sly00505538 Sly00521204 Sly00521203 Sly00505539
Solyc10g086780.2.1	Sly00500115 Sly00513583 Sly00513582 Sly00500116 Sly00500118
Solyc10g048155.1.1	Sly00509741 Sly00509743
Solyc10g049200.2.1	Sly00509749 Sly00509750
Solyc10g076260.2.1	Sly00497063 Sly00511201 Sly00511204 Sly00511205 Sly00511206 Sly00511207 Sly00511208 Sly00511209 Sly00511215 Sly00511218 Sly00511220 Sly00497054 Sly00497056 Sly00511212 Sly00497050 Sly00497058 Sly00497064 Sly00511210 Sly00497051 Sly00497052 Sly00497053 Sly00497066 Sly00511214 Sly00497055 Sly00511216 Sly00511202
Solyc10g076280.2.1	Sly00511247 Sly00511249 Sly00497071 Sly00511250 Sly00497078
Solyc10g076250.2.1	Sly00497044 Sly00511192 Sly00511195 Sly00511194 Sly00511196 Sly00511197
Solyc10g048100.2.1	Sly00509724 Sly00509726 Sly00509725
Solyc10g048120.2.1	Sly00492967 Sly00492968
Solyc10g048130.2.1	Sly00509730 Sly00509731
Solyc10g076330.2.1	Sly00497097 Sly00511278 Sly00497099 Sly00511277
Solyc10g076290.2.1	Sly00497088 Sly00497085 Sly00497087 Sly00511260 Sly00511263 Sly00511261 Sly00511265 Sly00497089 Sly00511262
Solyc10g076300.2.1	Sly00518342 Sly00518343 Sly00518344 Sly00518345 Sly00503647 Sly00503646 Sly00503648 Sly00503649
Solyc10g075070.2.1	Sly00518290 Sly00518292 Sly00518295
Solyc10g075090.2.1	Sly00518298 Sly00518299 Sly00518301 Sly00518300
Solyc10g075100.2.1	Sly00518302 Sly00518304 Sly00518306 Sly00518305 Sly00503591
Solyc10g076190.2.1	Sly00518320 Sly00518319 Sly00518318
Solyc10g076220.2.1	Sly00518321 Sly00518325 Sly00518330 Sly00518324 Sly00518322 Sly00503632
Solyc10g076230.2.1	Sly00518334 Sly00518335
Solyc10g076240.2.1	Sly00518336 Sly00518337 Sly00518333
Solyc10g086460.2.1	Sly00500001 Sly00513480 Sly00513482 Sly00500002
Solyc10g086520.2.1	Sly00500023 Sly00500025 Sly00500026
Solyc10g086510.2.1	Sly00513516 Sly00513517 Sly00513518
Solyc10g086530.1.1	Sly00513520 Sly00500033 Sly00513521 Sly00513523 Sly00513524 Sly00513522
Solyc10g086540.2.1	Sly00505441 Sly00521132 Sly00521131 Sly00505442 Sly00521133
Solyc10g086470.2.1	Sly00500005 Sly00513484 Sly00513485 Sly00500006 Sly00513486
Solyc10g086490.2.1	Sly00521125 Sly00505437
Solyc10g074823.1.1	Sly00518200 Sly00518201 Sly00503536
Solyc10g086480.2.1	Sly00500010 Sly00513489 Sly00513501 Sly00500008 Sly00513490 Sly00513500 Sly00500009 Sly00513498 Sly00513497 Sly00513514 Sly00513502 Sly00513503
Solyc10g049300.2.1	Sly00493159 Sly00493156 Sly00493160 Sly00493158
Solyc10g074890.2.1	Sly00518205 Sly00518206 Sly00511093 Sly00518207 Sly00518208 Sly00518210 Sly00518213 Sly00518212 Sly00518215 Sly00518211 Sly00518218
Solyc10g074900.2.1	Sly00503540 Sly00518221 Sly00518230 Sly00518222 Sly00518226 Sly00518227 Sly00503541 Sly00503542
Solyc10g074920.2.1	Sly00496879 Sly00511095 Sly00496880 Sly00511096 Sly00496878
Solyc10g074910.2.1	Sly00518241 Sly00518243 Sly00518250 Sly00518239 Sly00518240 Sly00503547 Sly00503545 Sly00503546 Sly00518245
Solyc10g074930.1.1	Sly00503551 Sly00503553 Sly00503554 Sly00503552 Sly00518261 Sly00518260 Sly00518259
Solyc10g074940.2.1	Sly00511098 Sly00511099 Sly00511104 Sly00511114 Sly00511102 Sly00511101 Sly00496888 Sly00511108 Sly00511111 Sly00511112 Sly00496889 Sly00511100
Solyc10g086560.2.1	Sly00505448 Sly00521143 Sly00521144 Sly00505449 Sly00521142 Sly00521145 Sly00505450 Sly00505447 Sly00505451
Solyc10g086660.2.1	Sly00505516 Sly00505517 Sly00505518 Sly00521182 Sly00521184 Sly00521186 Sly00505519
Solyc10g086640.2.1	Sly00521171 Sly00521174 Sly00505507 Sly00521176 Sly00521175 Sly00521179
Solyc10g086600.2.1	Sly00521168 Sly00521169
Solyc10g086620.2.1	Sly00500051 Sly00500053 Sly00513530 Sly00513531 Sly00500052
Solyc10g074960.2.1	Sly00511123 Sly00511124 Sly00511121 Sly00511122 Sly00496898 Sly00496899 Sly00511128
Solyc10g086580.2.1	Sly00521166 Sly00521167 Sly00505490 Sly00505498 Sly00505481 Sly00505491
Solyc10g086565.1.1	Sly00521146 Sly00521147 Sly00521148 Sly00521149 Sly00505460 Sly00521156 Sly00521154 Sly00521153 Sly00505464 Sly00521155 Sly00521150 Sly00505463 Sly00521159
Solyc10g086570.3.1	Sly00521160 Sly00521164 Sly00521165
Solyc10g074980.2.1	Sly00496904 Sly00511129 Sly00496905 Sly00496906 Sly00511131
Solyc10g074990.2.1	Sly00503568 Sly00518266 Sly00518267 Sly00518268
Solyc10g049215.1.1	Sly00516999 Sly00517001
Solyc10g075040.2.1	Sly00496915 Sly00496916 Sly00518278 Sly00518279 Sly00518282 Sly00496914 Sly00496912 Sly00518286 Sly00496923 Sly00518280 Sly00496917 Sly00518281 Sly00518283 Sly00518284 Sly00503576 Sly00518287 Sly00518288 Sly00511142 Sly00518285 Sly00496919
Solyc10g049210.2.1	Sly00493060 Sly00509759 Sly00509760 Sly00509761 Sly00509774 Sly00509768 Sly00509765 Sly00509772 Sly00509764 Sly00509773 Sly00493065 Sly00509779 Sly00509770 Sly00493064 Sly00493067 Sly00509776 Sly00509777 Sly00509771 Sly00493062 Sly00509786 Sly00509782 Sly00509775
Solyc10g049270.2.1	Sly00509805 Sly00509804 Sly00509803 Sly00493124
Solyc10g049280.2.1	Sly00517008 Sly00517014 Sly00517022 Sly00502628 Sly00517010 Sly00517012 Sly00517018 Sly00517023 Sly00517009 Sly00517016 Sly00517013 Sly00517017
Solyc10g075020.2.1	Sly00518275 Sly00518273 Sly00518274 Sly00518277
Solyc10g047360.2.1	Sly00502495 Sly00516860 Sly00502496 Sly00502498 Sly00502497 Sly00516861
Solyc10g047340.2.1	Sly00491937 Sly00509466
Solyc10g047320.2.1	Sly00502490 Sly00502489 Sly00516858
Solyc10g047530.2.1	Sly00492054 Sly00509491 Sly00509492
Solyc10g047500.2.1	Sly00492031 Sly00509488
Solyc10g047370.2.1	Sly00502500 Sly00516864 Sly00502501 Sly00502502 Sly00516868 Sly00516869 Sly00516866 Sly00516865 Sly00502503 Sly00516873
Solyc10g047220.2.1	Sly00509423 Sly00491819 Sly00509424 Sly00491820 Sly00509425 Sly00491821 Sly00509426 Sly00491822
Solyc10g047240.2.1	Sly00516844 Sly00516846 Sly00516847
Solyc10g047260.1.1	Sly00516855 Sly00516856
Solyc10g047270.2.1	Sly00509434 Sly00509435 Sly00509437 Sly00509438 Sly00491851 Sly00509436 Sly00491852 Sly00509441 Sly00509443 Sly00491855 Sly00491854 Sly00509445
Solyc10g011740.3.1	Sly00501143 Sly00515400 Sly00515401 Sly00515396 Sly00515397 Sly00515398 Sly00515399 Sly00501141 Sly00501142 Sly00515402
Solyc10g011750.3.1	Sly00515408 Sly00501145 Sly00501146
Solyc10g011770.3.1	Sly00483578 Sly00507006 Sly00507009 Sly00483579 Sly00507010 Sly00507011
Solyc10g011760.3.1	Sly00501147 Sly00515415 Sly00515414 Sly00515413
Solyc10g011840.2.1	Sly00507028 Sly00483633 Sly00507029
Solyc10g011820.3.1	Sly00483592 Sly00483600 Sly00483599 Sly00507014 Sly00483595 Sly00483593 Sly00507015 Sly00483601 Sly00483597 Sly00507016 Sly00483594 Sly00507018 Sly00507017
Solyc10g011870.3.1	Sly00515433 Sly00515436 Sly00515441 Sly00515434 Sly00515437 Sly00515442 Sly00501169 Sly00515435
Solyc10g011940.1.1	Sly00515465 Sly00515468 Sly00515472 Sly00515466 Sly00515469 Sly00515483 Sly00515475
Solyc10g011943.1.1	Sly00507040 Sly00507041
Solyc10g011980.3.1	Sly00507045 Sly00507046 Sly00507048 Sly00507050 Sly00507047 Sly00507054 Sly00507053
Solyc10g012030.3.1	Sly00501192 Sly00515492 Sly00515497 Sly00515491 Sly00515495 Sly00515494 Sly00515501 Sly00501191 Sly00515500
Solyc10g012060.3.1	Sly00515505 Sly00507072 Sly00507078 Sly00507079 Sly00507080 Sly00483714 Sly00507081 Sly00483720 Sly00483713 Sly00483716 Sly00483715
Solyc10g012070.3.1	Sly00515506 Sly00515507 Sly00515508 Sly00515509 Sly00515510 Sly00501199
Solyc10g012050.3.1	Sly00507063 Sly00507066 Sly00507069 Sly00507068 Sly00507064 Sly00507065 Sly00483707 Sly00507067
Solyc10g012090.1.1	Sly00507085 Sly00507086
Solyc10g012210.2.1	Sly00507100 Sly00483775 Sly00483776 Sly00507101 Sly00507102 Sly00483780 Sly00483778 Sly00483779
Solyc10g012190.2.1	Sly00507097 Sly00507098 Sly00507099
Solyc10g012160.3.1	Sly00515544 Sly00515545 Sly00515548 Sly00515550 Sly00515543 Sly00501222
Solyc10g012100.1.1	Sly00507088 Sly00507089 Sly00507090
Solyc10g012080.3.1	Sly00515513 Sly00515512 Sly00515515 Sly00515519 Sly00515530 Sly00515516 Sly00515522 Sly00515532 Sly00515526 Sly00515534 Sly00515518
Solyc10g012170.3.1	Sly00515559 Sly00515560 Sly00501225 Sly00501226 Sly00501228 Sly00501227 Sly00501230
Solyc10g012420.3.1	Sly00483883 Sly00483882 Sly00507135 Sly00483884
Solyc10g012370.3.1	Sly00501246 Sly00515578
Solyc10g012350.2.1	Sly00515565 Sly00515576 Sly00515569 Sly00501245
Solyc10g012240.3.1	Sly00507107 Sly00483800 Sly00483799 Sly00507112 Sly00507108 Sly00483798 Sly00507111 Sly00507110 Sly00483801
Solyc10g012360.1.1	Sly00507125 Sly00507124 Sly00507126
Solyc10g012430.3.1	Sly00501253 Sly00501254 Sly00515586 Sly00515588 Sly00515585 Sly00515589 Sly00501258 Sly00515587 Sly00515592
Solyc10g017490.2.1	Sly00507153 Sly00507154 Sly00507156 Sly00507151 Sly00507155 Sly00483971 Sly00507157 Sly00483973 Sly00507168 Sly00483975 Sly00507158 Sly00507152 Sly00507161
Solyc10g017510.3.1	Sly00483986 Sly00483987 Sly00507170 Sly00507171
Solyc10g017540.3.1	Sly00515623 Sly00515624 Sly00501272 Sly00515625
Solyc10g017500.1.1	Sly00515614 Sly00515616 Sly00515615 Sly00515617
Solyc10g017530.3.1	Sly00507175 Sly00507176 Sly00507183 Sly00507180 Sly00507179 Sly00507182 Sly00507181
Solyc10g017600.3.1	Sly00501277 Sly00515634 Sly00515635 Sly00515636 Sly00515638 Sly00515637 Sly00515639
Solyc10g055610.2.1	Sly00510836 Sly00510838 Sly00496431 Sly00496433 Sly00496434 Sly00496446 Sly00496439 Sly00496445 Sly00510837 Sly00496441 Sly00510841 Sly00496447 Sly00496443
Solyc10g055620.2.1	Sly00510856 Sly00496457 Sly00510864 Sly00510865 Sly00510844 Sly00496458 Sly00510840 Sly00510857 Sly00496461 Sly00510858 Sly00510860 Sly00496459 Sly00510859 Sly00496466 Sly00496462 Sly00496468 Sly00510866 Sly00510870
Solyc10g009490.2.1	Sly00515331 Sly00515332 Sly00515333 Sly00515334 Sly00515337 Sly00515341 Sly00515342 Sly00515338 Sly00515345 Sly00515336 Sly00501105 Sly00515344 Sly00515335 Sly00515343
Solyc10g009480.3.1	Sly00506938 Sly00483446 Sly00506939
Solyc10g009450.1.1	Sly00506932 Sly00483431
Solyc10g009400.3.1	Sly00501097 Sly00515307 Sly00515308 Sly00515313 Sly00515316 Sly00515323 Sly00515324 Sly00515306 Sly00515311 Sly00515321 Sly00515315 Sly00515322 Sly00515325 Sly00515319 Sly00515317 Sly00515314 Sly00501098
Solyc10g055710.2.1	Sly00503398 Sly00518063 Sly00496530 Sly00496532
Solyc10g055730.2.1	Sly00510907 Sly00510909 Sly00510908 Sly00510910 Sly00496548
Solyc10g009330.3.1	Sly00501086 Sly00506875 Sly00483358 Sly00506880 Sly00506887 Sly00506883 Sly00506884 Sly00506894 Sly00506890 Sly00506885 Sly00506891 Sly00483357 Sly00506886 Sly00506882 Sly00506878 Sly00506879 Sly00506897 Sly00501087 Sly00506889 Sly00506898 Sly00506896 Sly00506892
Solyc10g009350.3.1	Sly00515280 Sly00515281 Sly00515282 Sly00515284 Sly00515286 Sly00515287 Sly00515290 Sly00515291 Sly00515288 Sly00515289 Sly00515292 Sly00515293 Sly00501089
Solyc10g009360.3.1	Sly00515295 Sly00515296 Sly00515298 Sly00515299 Sly00501091
Solyc10g055650.2.1	Sly00510876 Sly00510877 Sly00510882 Sly00510881 Sly00510878 Sly00510879 Sly00510886 Sly00496501 Sly00510884 Sly00510885 Sly00510880 Sly00496500 Sly00510889 Sly00496504 Sly00510888
Solyc10g055640.2.1	Sly00518045 Sly00518047 Sly00518049 Sly00518051 Sly00503376 Sly00503377 Sly00518048 Sly00503374
Solyc10g055670.2.1	Sly00510895 Sly00510896 Sly00510897 Sly00510900 Sly00496518 Sly00510899 Sly00510902 Sly00496517
Solyc10g055800.2.1	Sly00518082 Sly00503418 Sly00503417 Sly00503419 Sly00518087 Sly00518088 Sly00518091
Solyc10g055770.2.1	Sly00510920 Sly00510921 Sly00510923 Sly00496585 Sly00510924 Sly00510922 Sly00510930 Sly00510926 Sly00510928 Sly00496586 Sly00510927 Sly00510925 Sly00510931 Sly00510929 Sly00510932 Sly00510933 Sly00510934
Solyc10g011680.3.1	Sly00515389 Sly00501139 Sly00515390 Sly00515391
Solyc10g011690.3.1	Sly00506982 Sly00506984 Sly00506985 Sly00506986 Sly00506983 Sly00506989 Sly00506992 Sly00483564 Sly00506987 Sly00506991 Sly00506988 Sly00483556 Sly00483559 Sly00483563 Sly00483565 Sly00483562
Solyc10g011670.3.1	Sly00483538 Sly00506977 Sly00506978 Sly00483541 Sly00506976 Sly00483548 Sly00506979
Solyc10g055740.2.1	Sly00518079 Sly00503405
Solyc10g055760.2.1	Sly00496580 Sly00510915 Sly00510916 Sly00496582 Sly00496581
Solyc10g009620.2.1	Sly00515376 Sly00501125
Solyc10g011660.3.1	Sly00515383 Sly00515373 Sly00501134 Sly00515382 Sly00515386 Sly00515381
Solyc10g009590.3.1	Sly00501118 Sly00515366 Sly00515364 Sly00515370 Sly00515371 Sly00515365
Solyc00g075030.3.1	Sly00501121
Solyc10g009580.3.1	Sly00501115 Sly00501116 Sly00501117 Sly00515362
Solyc10g009507.1.1	Sly00506950 Sly00483475 Sly00506958
Solyc10g009530.3.1	Sly00506951 Sly00506963 Sly00506964 Sly00506957 Sly00506962 Sly00483476 Sly00506965 Sly00506966
Solyc10g009503.1.1	Sly00506956 Sly00483473
Solyc10g009570.3.1	Sly00501111 Sly00515359 Sly00515356 Sly00515358 Sly00515357 Sly00501112
Solyc10g074360.1.1	Sly00518094 Sly00518095
Solyc10g074420.1.1	Sly00518099 Sly00503446 Sly00518100
Solyc10g074500.2.1	Sly00503470 Sly00518123 Sly00518122 Sly00518121 Sly00503471 Sly00518124
Solyc10g074520.2.1	Sly00503473 Sly00518125 Sly00503474 Sly00518126 Sly00518128
Solyc10g005080.3.1	Sly00481938 Sly00481936 Sly00481939 Sly00481942 Sly00481956 Sly00481940 Sly00505581 Sly00505588 Sly00505589 Sly00505583 Sly00481943 Sly00505582 Sly00481948 Sly00505584 Sly00505585
Solyc10g005100.3.1	Sly00481958 Sly00481959 Sly00505595 Sly00481961 Sly00481962 Sly00505596 Sly00505593
Solyc10g005120.2.1	Sly00505597 Sly00505598
Solyc10g005060.3.1	Sly00500136 Sly00513599 Sly00513598 Sly00513600 Sly00513601
Solyc10g005090.3.1	Sly00500142 Sly00513603 Sly00513602 Sly00513604
Solyc10g005030.3.1	Sly00505551 Sly00505552 Sly00481920 Sly00505554 Sly00481921 Sly00505557 Sly00505555 Sly00505560 Sly00505553 Sly00505563 Sly00505556 Sly00481922 Sly00505564
Solyc10g005040.3.1	Sly00505576 Sly00505577
Solyc10g074490.2.1	Sly00503469 Sly00518110 Sly00518113 Sly00518115 Sly00518117 Sly00518120
Solyc10g005020.3.1	Sly00513594 Sly00513595 Sly00513597 Sly00513596 Sly00500134
Solyc10g005000.3.1	Sly00513587 Sly00500129 Sly00513591 Sly00513589 Sly00513590 Sly00513588 Sly00513593 Sly00513592
Solyc10g074470.2.1	Sly00518105 Sly00503465 Sly00518106 Sly00503464 Sly00518107
Solyc10g005140.1.1	Sly00500155 Sly00513607
Solyc10g047823.1.1	Sly00516932 Sly00516931 Sly00502545 Sly00516933
Solyc10g047810.2.1	Sly00502540 Sly00516930
Solyc10g055270.1.1	Sly00510770 Sly00510771
Solyc10g055190.1.1	Sly00510761 Sly00496219
Solyc10g055200.1.1	Sly00510763 Sly00496230
Solyc10g055210.2.1	Sly00517988 Sly00517989
Solyc10g055240.2.1	Sly00496246 Sly00496247 Sly00510768
Solyc10g055260.2.1	Sly00517991 Sly00503300 Sly00517992
Solyc10g055300.1.1	Sly00510772
Solyc10g047650.2.1	Sly00492203 Sly00509562 Sly00509563
Solyc10g047643.1.1	Sly00509561 Sly00509564
Solyc10g047670.2.1	Sly00492231 Sly00492233 Sly00509568 Sly00509573 Sly00509569 Sly00492234 Sly00509571 Sly00509570 Sly00492235 Sly00509575
Solyc10g055400.1.1	Sly00510778 Sly00510779
Solyc10g047630.2.1	Sly00492189 Sly00509549 Sly00492191 Sly00509551
Solyc10g055370.2.1	Sly00518004 Sly00518005 Sly00503306 Sly00518006
Solyc10g055390.2.1	Sly00503317 Sly00518020 Sly00503318
Solyc10g055460.2.1	Sly00518026 Sly00518027 Sly00518028 Sly00518029 Sly00503336 Sly00503341 Sly00518030 Sly00518032 Sly00518033 Sly00518031 Sly00518036 Sly00518037 Sly00518034 Sly00518039
Solyc10g055450.2.1	Sly00510786 Sly00510784 Sly00510785 Sly00510788 Sly00510787 Sly00496323 Sly00496326 Sly00510789 Sly00496322 Sly00496324
Solyc10g047540.2.1	Sly00509494 Sly00509500 Sly00509501 Sly00509498 Sly00509496 Sly00509499 Sly00509509 Sly00509503 Sly00509514 Sly00509513 Sly00509512 Sly00509497 Sly00509502 Sly00509508 Sly00509510 Sly00509504 Sly00509505 Sly00509506 Sly00509507 Sly00509511 Sly00509516 Sly00509517 Sly00509495 Sly00492060 Sly00509518 Sly00509515 Sly00509520
Solyc10g047550.1.1	Sly00509523 Sly00492078
Solyc10g055560.2.1	Sly00496400 Sly00510823
Solyc10g055550.2.1	Sly00496384 Sly00496385 Sly00510820
Solyc10g055545.1.1	Sly00510817 Sly00510819 Sly00510818
Solyc10g055540.2.1	Sly00510796 Sly00510801 Sly00510808 Sly00496378 Sly00510797 Sly00510804 Sly00496365 Sly00496367 Sly00510802 Sly00510803 Sly00510807 Sly00496364 Sly00510798 Sly00510800 Sly00510805 Sly00510799 Sly00496372 Sly00496380 Sly00496363 Sly00496370 Sly00496369 Sly00496377 Sly00510816 Sly00496373
Solyc10g079640.2.1	Sly00519123 Sly00504151 Sly00504152 Sly00519126
Solyc10g079620.2.1	Sly00498016 Sly00498015
Solyc10g079590.1.1	Sly00504145 Sly00519107 Sly00504144 Sly00519109
Solyc10g006157.1.1	Sly00514045 Sly00514054 Sly00514066 Sly00514076 Sly00514056 Sly00514083
Solyc10g079190.2.1	Sly00518947 Sly00518946
Solyc10g079210.2.1	Sly00497886 Sly00511717
Solyc10g079140.2.1	Sly00497873 Sly00497875 Sly00511709 Sly00511713
Solyc10g079080.2.1	Sly00518882 Sly00504039
Solyc10g079460.1.1	Sly00497978 Sly00511768
Solyc10g079290.2.1	Sly00504089 Sly00518972 Sly00518974 Sly00518973 Sly00504091 Sly00504093 Sly00504092 Sly00504094
Solyc10g005650.3.1	Sly00500262 Sly00513868
Solyc10g005800.3.1	Sly00513937
Solyc10g005830.3.1	Sly00505728 Sly00482116 Sly00505729
Solyc10g045540.2.1	Sly00509185 Sly00509187 Sly00509188 Sly00509189 Sly00509186 Sly00509193 Sly00509190 Sly00509192 Sly00509191 Sly00491099 Sly00491100 Sly00491098
Solyc10g006110.3.1	Sly00500320 Sly00514009 Sly00500321
Solyc10g045640.2.1	Sly00502361 Sly00516707 Sly00502360
Solyc10g005290.3.1	Sly00500182 Sly00513647 Sly00500181 Sly00513646 Sly00500183 Sly00513648
Solyc10g046860.1.1	Sly00491404 Sly00509308 Sly00509310
Solyc10g006423.1.1	Sly00514139 Sly00514137 Sly00514138 Sly00500446 Sly00514140
Solyc10g006370.3.1	Sly00482292 Sly00482293
Solyc10g006400.3.1	Sly00505944 Sly00505945
Solyc10g079920.2.1	Sly00519184 Sly00519185
Solyc10g080080.2.1	Sly00519245 Sly00519251 Sly00519250 Sly00519247 Sly00519248 Sly00519246 Sly00519249 Sly00504254 Sly00519244 Sly00519252 Sly00504255
Solyc10g080210.2.1	Sly00504282 Sly00504297 Sly00504298
Solyc10g080400.2.1	Sly00512047 Sly00512054 Sly00512064 Sly00498261
Solyc10g079840.2.1	Sly00498098 Sly00498099 Sly00498097 Sly00511879 Sly00511881 Sly00498100
Solyc10g079890.2.1	Sly00504203 Sly00519177 Sly00504204
Solyc10g079870.2.1	Sly00498106 Sly00511887 Sly00498107 Sly00498108
Solyc10g079790.1.1	Sly00511854 Sly00498072 Sly00511856 Sly00511855
Solyc10g078620.1.1	Sly00503917 Sly00518745 Sly00518746
Solyc10g078550.3.1	Sly00518707 Sly00503894 Sly00518709 Sly00503896 Sly00503897 Sly00503903
Solyc10g078530.2.1	Sly00518703 Sly00503891
Solyc10g078520.2.1	Sly00497650 Sly00497651 Sly00511619 Sly00497652 Sly00497654
Solyc10g078450.2.1	Sly00497633 Sly00497636
Solyc10g078430.2.1	Sly00497616 Sly00511596 Sly00497618
Solyc10g078240.2.1	Sly00503819 Sly00503820 Sly00518582
Solyc10g077050.2.1	Sly00518543 Sly00503793 Sly00518548 Sly00503795 Sly00518549
Solyc10g076880.2.1	Sly00497301
Solyc10g076800.2.1	Sly00503718 Sly00518474 Sly00503719 Sly00518477 Sly00503717
Solyc10g007350.3.1	Sly00482579 Sly00506262 Sly00506264
Solyc10g007080.3.1	Sly00514455 Sly00500709 Sly00500708
Solyc10g007190.2.1	Sly00514528 Sly00514531
Solyc10g007260.3.1	Sly00514533 Sly00514534 Sly00514535 Sly00514536
Solyc10g007010.1.1	Sly00500697 Sly00514430 Sly00500696 Sly00500694 Sly00500693 Sly00514432 Sly00500695 Sly00514431
Solyc10g006990.3.1	Sly00500687 Sly00514415 Sly00500689 Sly00500686 Sly00514416 Sly00500688 Sly00514417
Solyc10g007030.2.1	Sly00500698 Sly00514437
Solyc10g007060.3.1	Sly00506166 Sly00506163 Sly00506167 Sly00506161 Sly00506160 Sly00506168 Sly00506170 Sly00506172
Solyc10g006790.3.1	Sly00482385 Sly00506082 Sly00482386 Sly00482387
Solyc10g006700.1.1	Sly00514212 Sly00514213 Sly00514215 Sly00514216 Sly00514211 Sly00482357 Sly00514217
Solyc10g045190.2.1	Sly00502289 Sly00502292 Sly00502288 Sly00516563 Sly00516555
Solyc10g006520.3.1	Sly00500558 Sly00514154 Sly00514155
Solyc10g006530.3.1	Sly00482320 Sly00482322 Sly00482321
Solyc10g078660.2.1	Sly00511638 Sly00497702 Sly00511639
Solyc10g078740.2.1	Sly00518793 Sly00518794 Sly00518796 Sly00518795
Solyc10g007900.3.1	Sly00514850 Sly00514853 Sly00500895
Solyc10g007710.3.1	Sly00506314 Sly00482695
Solyc10g007700.3.1	Sly00500860 Sly00514760
Solyc10g007550.3.1	Sly00514692 Sly00500837 Sly00514693 Sly00514700 Sly00514694 Sly00514697 Sly00514696 Sly00514695 Sly00500838 Sly00514701
Solyc10g007480.3.1	Sly00500800 Sly00514640 Sly00500798 Sly00500799 Sly00500813
Solyc10g045390.2.1	Sly00502318 Sly00516646 Sly00516647 Sly00516645 Sly00502321
Solyc10g045430.2.1	Sly00509115 Sly00490764 Sly00490767 Sly00509116
Solyc10g078890.2.1	Sly00497752 Sly00497753
Solyc10g079000.1.1	Sly00504022 Sly00504021 Sly00518864
Solyc10g078830.2.1	Sly00497743 Sly00497742 Sly00511654
Solyc10g082030.2.1	Sly00519986 Sly00519985 Sly00504741 Sly00519988
Solyc10g082020.2.1	Sly00512532 Sly00498885
Solyc10g024320.2.1	Sly00507717 Sly00507718 Sly00507721 Sly00486128
Solyc10g083110.2.1	Sly00519996 Sly00504750 Sly00504749
Solyc10g081920.2.1	Sly00519967 Sly00504733 Sly00519969 Sly00519966 Sly00504732
Solyc10g044920.2.1	Sly00489623 Sly00489624
Solyc10g044840.2.1	Sly00516472 Sly00516473 Sly00516477 Sly00502234 Sly00502233 Sly00516475 Sly00516476 Sly00502240 Sly00502239 Sly00502237
Solyc10g083200.2.1	Sly00520044 Sly00504795 Sly00504796 Sly00504797
Solyc10g083250.2.1	Sly00520054 Sly00520055
Solyc10g083270.3.1	Sly00498933 Sly00512558 Sly00498935
Solyc10g083280.3.1	Sly00498934 Sly00512560 Sly00498937 Sly00498936
Solyc10g083290.4.1	Sly00520058 Sly00520057 Sly00504814
Solyc10g083360.2.1	Sly00498977 Sly00498979 Sly00498975 Sly00498978 Sly00512583
Solyc10g083335.1.1	Sly00520083 Sly00520084
Solyc10g083820.2.1	Sly00512772 Sly00499202
Solyc10g084040.2.1	Sly00504993 Sly00504992 Sly00504991 Sly00504994
Solyc10g084180.2.1	Sly00520395 Sly00520397 Sly00520398
Solyc10g084110.2.1	Sly00499306 Sly00512880
Solyc10g080690.2.1	Sly00498397 Sly00512119
Solyc10g080760.2.1	Sly00498431 Sly00512126 Sly00512128
Solyc10g080780.2.1	Sly00498443 Sly00498442 Sly00498444
Solyc10g080710.2.1	Sly00504441 Sly00504449 Sly00504450 Sly00504448 Sly00504455
Solyc10g080660.2.1	Sly00519584 Sly00519586 Sly00504426 Sly00519587 Sly00519585 Sly00504431 Sly00504428 Sly00519590 Sly00504430 Sly00504429 Sly00504432
Solyc10g080500.2.1	Sly00498292 Sly00512082 Sly00498293
Solyc10g080900.2.1	Sly00498491 Sly00512164 Sly00498494
Solyc10g024410.2.1	Sly00516002 Sly00516003 Sly00501563 Sly00516005 Sly00516006 Sly00516014
Solyc10g081160.2.1	Sly00498561 Sly00512217
Solyc10g081260.2.1	Sly00498597 Sly00512279 Sly00512282 Sly00512278
Solyc10g081360.2.1	Sly00504600 Sly00519784 Sly00519785 Sly00504599 Sly00519786
Solyc10g081085.1.1	Sly00498547 Sly00498546 Sly00512202 Sly00512200 Sly00512201
Solyc10g080980.2.1	Sly00512180 Sly00498522
Solyc10g080970.2.1	Sly00498516 Sly00512174 Sly00512175
Solyc10g081580.2.1	Sly00498703 Sly00512357 Sly00512354 Sly00512355 Sly00512358 Sly00512359 Sly00512361 Sly00512364
Solyc10g081620.2.1	Sly00512380 Sly00498719 Sly00498718
Solyc10g081440.2.1	Sly00519812 Sly00504610 Sly00519813 Sly00519815 Sly00519814 Sly00519819 Sly00519817
Solyc10g081370.2.1	Sly00512321 Sly00498639 Sly00498640
Solyc10g081480.2.1	Sly00504628 Sly00504630 Sly00504629 Sly00504631
Solyc10g081470.2.1	Sly00519829 Sly00519831 Sly00519833 Sly00504625 Sly00504622 Sly00519832 Sly00504624 Sly00504626
Solyc10g081450.2.1	Sly00512333 Sly00498661 Sly00498662 Sly00498660
Solyc10g018350.2.1	Sly00515743 Sly00501413 Sly00515744 Sly00501414
Solyc10g018200.2.1	Sly00501366 Sly00515711 Sly00515712
Solyc10g054570.2.1	Sly00495993 Sly00495994 Sly00510656 Sly00495995 Sly00495996 Sly00510657 Sly00495997
Solyc10g054670.2.1	Sly00517915 Sly00517917 Sly00517916
Solyc10g054820.2.1	Sly00517950 Sly00503276
Solyc10g054380.2.1	Sly00510621 Sly00510620 Sly00510622 Sly00510624 Sly00510628 Sly00495899
Solyc10g038190.2.1	Sly00516159 Sly00501755 Sly00516162 Sly00516163 Sly00501756
Solyc10g054070.1.1	Sly00495763 Sly00495764
Solyc10g038120.2.1	Sly00508146 Sly00508148 Sly00508150 Sly00487539 Sly00508145 Sly00508147 Sly00508149 Sly00487544 Sly00508151 Sly00487545 Sly00487542
Solyc10g054100.2.1	Sly00517812 Sly00517810 Sly00517815 Sly00517809 Sly00517813 Sly00517814 Sly00503047 Sly00517816
Solyc10g050690.2.1	Sly00502812 Sly00517389
Solyc10g050920.1.1	Sly00510326 Sly00510328 Sly00510325 Sly00510327 Sly00494791 Sly00494792 Sly00510329
Solyc10g050850.2.1	Sly00517418 Sly00517419 Sly00517420 Sly00502825
Solyc10g084270.2.1	Sly00499347 Sly00512909 Sly00512910 Sly00499348 Sly00499351
Solyc10g084260.2.1	Sly00520410 Sly00520411 Sly00520412 Sly00520413 Sly00505022
Solyc10g084230.2.1	Sly00512904 Sly00499334
Solyc10g085400.2.1	Sly00520730 Sly00505195 Sly00520732 Sly00520731 Sly00520733
Solyc10g085380.2.1	Sly00499701 Sly00513267
Solyc10g085300.2.1	Sly00505192 Sly00505191 Sly00505193
Solyc10g085215.1.1	Sly00499649 Sly00513194 Sly00513195 Sly00513196 Sly00499652
Solyc10g085180.2.1	Sly00499636 Sly00499637
Solyc10g051300.2.1	Sly00517622 Sly00502948 Sly00517623 Sly00502951
Solyc10g051273.1.1	Sly00510405 Sly00510404 Sly00510406 Sly00495006 Sly00510403 Sly00155877 Sly00510407 Sly00495008 Sly00155878 Sly00155883 Sly00457058
Solyc10g051310.2.1	Sly00502953 Sly00517627 Sly00502954
Solyc10g085040.1.1	Sly00499582 Sly00513148 Sly00513146 Sly00513147
Solyc10g049665.1.1	Sly00509922
Solyc10g084810.2.1	Sly00520586 Sly00520591 Sly00520588 Sly00520589
Solyc10g084610.3.1	Sly00499459 Sly00513009 Sly00499460
Solyc10g084620.2.1	Sly00513014 Sly00499461
Solyc10g084600.2.1	Sly00505070 Sly00505071 Sly00505072
Solyc10g084500.1.1	Sly00505059 Sly00520454 Sly00520456
Solyc10g084410.2.1	Sly00505048 Sly00505047
Solyc10g050220.2.1	Sly00494032 Sly00510082 Sly00494031 Sly00510081 Sly00510083 Sly00494034
Solyc10g086250.2.1	Sly00521075 Sly00505391
Solyc10g086240.2.1	Sly00505380 Sly00521073 Sly00521074
Solyc10g086220.2.1	Sly00521069 Sly00505374
Solyc10g086137.1.1	Sly00499904 Sly00499905
Solyc10g086120.2.1	Sly00521041 Sly00521042 Sly00521048 Sly00521043 Sly00521049
Solyc10g086040.2.1	Sly00505336 Sly00505337 Sly00505338 Sly00505339
Solyc10g086020.2.1	Sly00505331 Sly00505332
Solyc10g085950.2.1	Sly00513412 Sly00513413
Solyc10g085800.2.1	Sly00520868 Sly00520870 Sly00520871 Sly00520874 Sly00520873 Sly00520872 Sly00520879 Sly00520880 Sly00520878
Solyc10g085830.2.1	Sly00499831 Sly00499832
Solyc10g085810.2.1	Sly00499827 Sly00499828
Solyc10g076720.2.1	Sly00511363 Sly00511364
Solyc10g085630.2.1	Sly00513356 Sly00499778 Sly00513357 Sly00513358 Sly00513362 Sly00513363 Sly00513361 Sly00513360 Sly00499776 Sly00499777
Solyc10g008720.3.1	Sly00500996 Sly00515064 Sly00515066 Sly00515065 Sly00515067 Sly00515068
Solyc10g008870.3.1	Sly00483077 Sly00483080
Solyc10g008800.3.1	Sly00515103 Sly00515106 Sly00515105
Solyc10g008810.3.1	Sly00501021 Sly00515109 Sly00515110
Solyc10g009045.1.1	Sly00515183 Sly00501046 Sly00515176 Sly00515175
Solyc10g009030.3.1	Sly00483187 Sly00506758 Sly00506759
Solyc10g008440.3.1	Sly00506551 Sly00482907
Solyc10g076600.2.1	Sly00518405 Sly00518408 Sly00518406 Sly00503683 Sly00503686
Solyc10g076480.2.1	Sly00497184 Sly00511312
Solyc10g008360.2.1	Sly00500961 Sly00514988
Solyc10g076350.2.1	Sly00497119 Sly00497118 Sly00511285 Sly00511286 Sly00511287 Sly00511288
Solyc10g008140.3.1	Sly00506438 Sly00506444 Sly00506442 Sly00506443 Sly00506445 Sly00482797
Solyc10g008010.3.1	Sly00506375 Sly00506376 Sly00506377 Sly00506378 Sly00506386 Sly00506383 Sly00506389 Sly00506382 Sly00506381 Sly00482761
Solyc10g008020.3.1	Sly00482762 Sly00506395 Sly00482763 Sly00482764 Sly00506396 Sly00482765
Solyc10g007980.3.1	Sly00500918 Sly00514876 Sly00514877
Solyc10g008500.3.1	Sly00515014 Sly00500972 Sly00515020 Sly00515015 Sly00515021 Sly00515017 Sly00515022
Solyc10g074700.2.1	Sly00496772 Sly00510997 Sly00510998
Solyc10g049550.2.1	Sly00517080 Sly00502663
Solyc10g075067.1.1	Sly00496934 Sly00511163 Sly00496936 Sly00511162
Solyc10g076270.2.1	Sly00511221 Sly00511233 Sly00511236 Sly00511211 Sly00511224 Sly00511223 Sly00511226 Sly00511239 Sly00511230 Sly00511241 Sly00511222 Sly00511246 Sly00511244 Sly00497060 Sly00511240 Sly00511234
Solyc10g076320.2.1	Sly00497093 Sly00511274
Solyc10g075150.2.1	Sly00518291 Sly00518316 Sly00503610 Sly00518317 Sly00503611 Sly00503612
Solyc10g048140.2.1	Sly00509738 Sly00492995
Solyc10g074870.2.1	Sly00511086 Sly00496871 Sly00496872
Solyc10g086550.2.1	Sly00521137 Sly00521138 Sly00505444 Sly00521141 Sly00505445 Sly00505446
Solyc10g075035.1.1	Sly00511138 Sly00511137 Sly00511159 Sly00511145 Sly00496920 Sly00511141
Solyc10g047300.2.1	Sly00491909 Sly00491911 Sly00509457 Sly00491912 Sly00491910 Sly00509458 Sly00491913 Sly00491914
Solyc10g047290.2.1	Sly00491870 Sly00509449 Sly00491871 Sly00509450 Sly00491872 Sly00491873
Solyc10g011790.3.1	Sly00501151 Sly00501149 Sly00515417
Solyc10g011810.3.1	Sly00515429 Sly00515430 Sly00515426 Sly00515428
Solyc10g011910.3.1	Sly00501185 Sly00515460 Sly00515461
Solyc10g011960.2.1	Sly00515486 Sly00515488 Sly00515489
Solyc10g017480.1.1	Sly00501267 Sly00515613
Solyc10g017570.3.1	Sly00501274 Sly00501275 Sly00515630 Sly00515633 Sly00515631
Solyc10g017590.2.1	Sly00484010
Solyc10g009440.3.1	Sly00515327 Sly00501101
Solyc10g009430.3.1	Sly00506922 Sly00506923 Sly00483410 Sly00483408 Sly00483409 Sly00483411
Solyc10g009420.3.1	Sly00506916 Sly00483402 Sly00483403
Solyc10g055630.2.1	Sly00496478 Sly00496480 Sly00503372 Sly00510875
Solyc10g055720.2.1	Sly00518067 Sly00518069 Sly00518070 Sly00503400
Solyc10g074430.2.1	Sly00503447 Sly00518101
Solyc10g009540.1.1	Sly00483482 Sly00506972
Solyc10g047640.2.1	Sly00492198 Sly00509556 Sly00492202 Sly00492199
Solyc10g055420.2.1	Sly00518022 Sly00518021 Sly00518023 Sly00518025 Sly00518024 Sly00503330
Solyc10g055477.1.1	Sly00510795
Solyc10g079580.2.1	Sly00519098 Sly00519101
Solyc10g079270.2.1	Sly00497903 Sly00511731 Sly00511732
Solyc10g079090.2.1	Sly00497825 Sly00497827
Solyc10g005540.3.1	Sly00505665 Sly00505666
Solyc10g006030.3.1	Sly00482172 Sly00505843 Sly00482173
Solyc10g005200.3.1	Sly00513610 Sly00513614
Solyc10g005350.3.1	Sly00505645 Sly00505644 Sly00482010
Solyc10g047000.2.1	Sly00502440 Sly00516753 Sly00516754 Sly00516752 Sly00516755 Sly00502442
Solyc10g047060.2.1	Sly00491575 Sly00509370
Solyc10g080050.2.1	Sly00511924 Sly00511923
Solyc10g080140.2.1	Sly00511961 Sly00498181
Solyc10g007110.3.1	Sly00514491 Sly00514494 Sly00514495 Sly00514498 Sly00514492
Solyc10g045107.1.1	Sly00516541
Solyc10g006660.3.1	Sly00514209
Solyc10g006960.2.1	Sly00500676 Sly00500677
Solyc10g007620.2.1	Sly00500852 Sly00514735
Solyc10g083650.1.1	Sly00520218 Sly00520219
Solyc10g083900.2.1	Sly00520310
Solyc10g083980.1.1	Sly00520341 Sly00520342
Solyc10g084120.2.1	Sly00505000 Sly00520362
Solyc10g080570.2.1	Sly00498311 Sly00498310
Solyc10g062110.2.1	Sly00508406 Sly00488569
Solyc10g081210.2.1	Sly00512232 Sly00498574 Sly00498575
Solyc10g081300.1.1	Sly00504592 Sly00519770
Solyc10g081410.2.1	Sly00512332 Sly00498653 Sly00498652 Sly00498655 Sly00498654
Solyc10g018250.2.1	Sly00484525 Sly00484526
Solyc10g018060.2.1	Sly00484317 Sly00484318
Solyc10g054590.2.1	Sly00496004 Sly00496005
Solyc10g050405.1.1	Sly00517316
Solyc10g050780.1.1	Sly00517402
Solyc10g053980.2.1	Sly00495691 Sly00495692
Solyc10g054060.2.1	Sly00517782 Sly00517783
Solyc10g050980.1.1	Sly00494826 Sly00510338
Solyc10g018500.1.1	Sly00501438 Sly00515766
Solyc10g049650.2.1	Sly00517104 Sly00517107 Sly00517108
Solyc10g049980.1.1	Sly00493811 Sly00493810
Solyc10g086350.2.1	Sly00521112 Sly00521110 Sly00521113 Sly00521111
Solyc10g086150.2.1	Sly00521056 Sly00521057
Solyc10g085700.1.1	Sly00513381
Solyc10g047930.2.1	Sly00509667 Sly00492612 Sly00492613
Solyc10g008820.3.1	Sly00515114 Sly00501022
Solyc10g009130.3.1	Sly00501061 Sly00515254
Solyc10g009270.3.1	Sly00483326 Sly00506866
Solyc10g008420.3.1	Sly00500965 Sly00514991 Sly00500966
Solyc10g008330.3.1	Sly00500959 Sly00514982
Solyc10g048055.1.1	Sly00516984 Sly00516983
Solyc10g076450.2.1	Sly00503668 Sly00503669
Solyc10g008515.1.1	Sly00482962 Sly00506605 Sly00506602
Solyc10g074730.3.1	Sly00496793 Sly00496794
Solyc10g075050.2.1	Sly00518289 Sly00503580
Solyc10g076200.2.1	Sly00497016 Sly00511191
Solyc10g075110.2.1	Sly00518310 Sly00518307 Sly00503607 Sly00518308
Solyc10g075130.2.1	Sly00518313 Sly00518312
Solyc10g074860.2.1	Sly00511085 Sly00496870
Solyc10g012410.3.1	Sly00501251 Sly00515580 Sly00501250 Sly00501248 Sly00515582 Sly00501249
Solyc10g017520.3.1	Sly00483990 Sly00507172
Solyc10g055700.2.1	Sly00510906 Sly00496531
Solyc10g055810.2.1	Sly00503420 Sly00518092
Solyc10g047610.2.1	Sly00516901 Sly00516902 Sly00516904 Sly00516905
Solyc10g047570.2.1	Sly00492152 Sly00492151
Solyc10g055470.2.1	Sly00518044 Sly00503352 Sly00503345 Sly00503353 Sly00503346
Solyc10g079680.2.1	Sly00498034 Sly00511803
Solyc10g079233.1.1	Sly00518956 Sly00518957
Solyc10g005660.3.1	Sly00505683 Sly00505684
Solyc10g005930.2.1	Sly00500290 Sly00513971
Solyc10g006880.3.1	Sly00514373 Sly00514374
Solyc10g006650.3.1	Sly00500591 Sly00500590
Solyc10g007890.3.1	Sly00482741 Sly00506356 Sly00506357
Solyc10g007820.3.1	Sly00506353 Sly00482713
Solyc10g078960.2.1	Sly00504016 Sly00504017
Solyc10g083300.2.1	Sly00520059 Sly00504819
Solyc10g080530.2.1	Sly00519526 Sly00504406
Solyc10g081310.2.1	Sly00519774 Sly00504594 Sly00504596 Sly00504595
Solyc10g081290.2.1	Sly00512287 Sly00498600 Sly00512288 Sly00512290 Sly00512297
Solyc10g081130.2.1	Sly00498551 Sly00498553 Sly00512204
Solyc10g017880.2.1	Sly00515671 Sly00501318
Solyc10g017960.2.1	Sly00501327 Sly00501328
Solyc10g039380.2.1	Sly00508274 Sly00488029 Sly00508278 Sly00488028 Sly00508279 Sly00488027 Sly00508277 Sly00508280
Solyc10g047950.2.1	Sly00502561 Sly00502559 Sly00502562 Sly00502563
Solyc10g047970.1.1	Sly00492659 Sly00492658 Sly00492660 Sly00509676
Solyc10g008760.3.1	Sly00515075
Solyc10g017580.3.1	Sly00507192 Sly00484011 Sly00484012 Sly00507193
Solyc10g005110.3.1	Sly00500144 Sly00505599 Sly00513606
Solyc10g079360.2.1	Sly00519008 Sly00519007 Sly00519005 Sly00504105 Sly00519016 Sly00519017 Sly00519020 Sly00519021 Sly00519009
Solyc10g047087.1.1	Sly00516767 Sly00516768
Solyc10g080310.2.1	Sly00498238 Sly00512037
Solyc10g078205.1.1	Sly00518575
Solyc10g007125.1.1	Sly00506192 Sly00506193
Solyc10g006910.2.1	Sly00506150 Sly00506151
Solyc10g018194.1.1	Sly00507317
Solyc10g054090.2.1	Sly00510581
Solyc10g084850.2.1	Sly00520611 Sly00520607 Sly00520610 Sly00505115 Sly00520608 Sly00505114 Sly00520609 Sly00505113 Sly00505118 Sly00505116
Solyc10g085985.1.1	Sly00520961
Solyc10g076485.1.1	Sly00518364 Sly00518365
Solyc10g075030.2.1	Sly00511136 Sly00496925 Sly00511139 Sly00511155
Solyc10g055820.2.1	Sly00503424 Sly00503428
Solyc10g044915.1.1	Sly00516491 Sly00516492 Sly00516493
Solyc10g018420.2.1	Sly00515758
Solyc10g008680.2.1	Sly00506642 Sly00506645 Sly00483018 Sly00506643
Solyc10g077010.2.1	Sly00511473 Sly00511477 Sly00497342
Solyc10g006810.3.1	Sly00514310
Solyc10g081980.2.1	Sly00512526 Sly00512529
Solyc10g017980.1.1	Sly00484199 Sly00484201
Solyc10g017620.3.1	Sly00507199 Sly00484016
Solyc10g007158.1.1	Sly00482528 Sly00482529
Solyc10g078850.1.1	Sly00497748 Sly00511655
Solyc10g054663.1.1	Sly00517923 Sly00496020 Sly00517921 Sly00517924
Solyc10g084745.1.1	Sly00520508 Sly00505089
Solyc10g050307.1.1	Sly00494198
Solyc10g049530.2.1	Sly00493422
Solyc10g007065.1.1	Sly00506175
Solyc10g084095.1.1	Sly00520357 Sly00520358
Solyc10g052545.1.1	Sly00510488 Sly00510489
Solyc10g050080.2.1	Sly00493910 Sly00510047
Solyc10g047560.2.1	Sly00516896 Sly00516897
Solyc10g037950.2.1	Sly00508075 Sly00487224 Sly00508076
Solyc10g076840.2.1	Sly00503725 Sly00503724
Solyc10g047990.2.1	Sly00509681 Sly00492686
Solyc10g085285.1.1	Sly00520719
Solyc10g012253.1.1	Sly00507115
Solyc10g054915.1.1	Sly00517970 Sly00517971
Solyc10g007670.3.1	Sly00506308 Sly00506309
Solyc10g054305.1.1	Sly00517861
Solyc10g079200.2.1	Sly00504079 Sly00518952 Sly00504077 Sly00504078 Sly00504081 Sly00518950
Solyc10g006215.1.1	Sly00514086
Solyc10g039195.1.1	Sly00508198
Solyc10g051277.1.1	Sly00517619 Sly00517620 Sly00517621
Solyc10g006670.1.1	Sly00500607
Solyc10g011920.2.1	Sly00507037 Sly00507038
Solyc10g062055.1.1	Sly00508394
Solyc10g085255.1.1	Sly00520723
Solyc10g083870.2.1	Sly00504958
Solyc10g054272.1.1	Sly00517855
Solyc10g006970.3.1	Sly00514411 Sly00500680
Solyc10g049510.2.1	Sly00517056 Sly00502660
Solyc11g012670.1.1	Sly00543714 Sly00557880 Sly00557881
Solyc11g012690.2.1	Sly00529089 Sly00548931 Sly00529091 Sly00548932
Solyc11g012660.2.1	Sly00548923 Sly00548924 Sly00548925 Sly00548927 Sly00529080 Sly00548926 Sly00548928 Sly00529084 Sly00529083
Solyc11g012680.2.1	Sly00557882 Sly00557885 Sly00543737 Sly00543743
Solyc11g012730.2.1	Sly00529104 Sly00548949
Solyc11g012760.2.1	Sly00557895 Sly00543746 Sly00557896 Sly00557897 Sly00557898 Sly00557899
Solyc11g012740.2.1	Sly00557886 Sly00557888 Sly00557891 Sly00557892 Sly00557894 Sly00557887 Sly00557893 Sly00557889
Solyc11g012810.2.1	Sly00548975 Sly00548980 Sly00548979 Sly00548983 Sly00529126 Sly00548976 Sly00529129
Solyc11g012780.2.1	Sly00529116 Sly00548968 Sly00548969 Sly00529117 Sly00548970 Sly00548971 Sly00548973 Sly00529119
Solyc11g012770.2.1	Sly00548956 Sly00548962 Sly00548959 Sly00548966 Sly00548957 Sly00548958 Sly00529112 Sly00548961 Sly00548965 Sly00529114
Solyc11g012790.2.1	Sly00557900 Sly00557901 Sly00543749 Sly00543750 Sly00543752 Sly00543751 Sly00543756
Solyc11g012820.2.1	Sly00548990 Sly00548993 Sly00548991 Sly00548992 Sly00548994 Sly00529136 Sly00529134 Sly00529137 Sly00529133
Solyc11g006245.1.1	Sly00547100 Sly00547098 Sly00547102 Sly00547101 Sly00547107 Sly00547113 Sly00547103 Sly00547109 Sly00547104 Sly00547105 Sly00547122 Sly00547099 Sly00547106 Sly00547110 Sly00547112 Sly00547119 Sly00547116 Sly00547117 Sly00547127 Sly00527139 Sly00547121 Sly00547115 Sly00547111 Sly00547108 Sly00547123 Sly00547118 Sly00527141 Sly00527144 Sly00547114 Sly00547131 Sly00547132 Sly00547141 Sly00547125 Sly…
Solyc11g006270.2.1	Sly00556015 Sly00556019 Sly00556016 Sly00542798 Sly00542799 Sly00556020
Solyc11g006300.2.1	Sly00556027 Sly00556030 Sly00542803 Sly00556032 Sly00556031 Sly00542804
Solyc11g006230.2.1	Sly00555998 Sly00555999 Sly00556004 Sly00556000 Sly00556002 Sly00556008 Sly00556001
Solyc11g006220.2.1	Sly00542789 Sly00555996 Sly00542792 Sly00555997
Solyc11g006200.2.1	Sly00547081 Sly00547083 Sly00547086 Sly00527123 Sly00547087 Sly00547088 Sly00527122 Sly00527125 Sly00527126 Sly00547089 Sly00547084 Sly00527124 Sly00527127
Solyc11g072860.2.1	Sly00542463 Sly00555311 Sly00542464 Sly00555312
Solyc11g073280.2.1	Sly00555313 Sly00542591
Solyc11g072930.2.1	Sly00542482 Sly00542483 Sly00555318 Sly00555316
Solyc11g072940.2.1	Sly00555323 Sly00542485 Sly00555332 Sly00555339 Sly00555324 Sly00542487 Sly00542488 Sly00555326 Sly00542489 Sly00555336 Sly00555335 Sly00542494 Sly00555342 Sly00555348 Sly00542492 Sly00542495 Sly00555328 Sly00555338 Sly00542496 Sly00555334 Sly00542493
Solyc11g073050.2.1	Sly00555354 Sly00555355 Sly00555357 Sly00555356 Sly00542520 Sly00542524 Sly00542522
Solyc11g073080.2.1	Sly00542530 Sly00555364 Sly00555363 Sly00555365 Sly00555367 Sly00555366 Sly00555369 Sly00555368 Sly00555386 Sly00555362 Sly00542533 Sly00542534 Sly00555370 Sly00555371 Sly00555372 Sly00555374 Sly00555380 Sly00555379 Sly00555376 Sly00555383 Sly00555385 Sly00555394 Sly00555377 Sly00555378 Sly00555382 Sly00555384 Sly00542536 Sly00555387 Sly00555375 Sly00555373 Sly00555381 Sly00542535 Sly00555395 Sly…
Solyc11g073120.2.1	Sly00542546 Sly00542545 Sly00542544 Sly00555396 Sly00555397 Sly00542547 Sly00555401 Sly00555400 Sly00555402 Sly00555403 Sly00555404 Sly00555405
Solyc11g073130.2.1	Sly00555406 Sly00555407 Sly00555418 Sly00555410 Sly00555411 Sly00555413 Sly00555408 Sly00555409 Sly00542550 Sly00555414 Sly00542555 Sly00542554 Sly00555420 Sly00555415 Sly00555423 Sly00542559
Solyc11g073150.1.1	Sly00542560 Sly00542561
Solyc11g073160.2.1	Sly00555427 Sly00555428 Sly00555432 Sly00542566 Sly00555431 Sly00555433 Sly00542563 Sly00555429 Sly00542568 Sly00542567
Solyc11g073210.2.1	Sly00555435 Sly00542572 Sly00555436
Solyc11g073220.2.1	Sly00555438 Sly00555442 Sly00555441 Sly00555445 Sly00555439 Sly00542574 Sly00555440 Sly00555443 Sly00555447 Sly00555448 Sly00555446
Solyc11g073240.2.1	Sly00555457 Sly00542579 Sly00542583 Sly00555455 Sly00555460 Sly00555462 Sly00555461
Solyc11g073255.1.1	Sly00563104 Sly00563105
Solyc11g073270.1.1	Sly00563108 Sly00563110 Sly00563123 Sly00563106 Sly00563107 Sly00563115 Sly00546788 Sly00563112 Sly00563114 Sly00563117 Sly00563118 Sly00546786 Sly00563109 Sly00563111 Sly00563116 Sly00563113 Sly00563119 Sly00546784 Sly00563125 Sly00546787 Sly00563121 Sly00563120 Sly00546789 Sly00546791 Sly00546790 Sly00546785 Sly00563127 Sly00563126
Solyc11g073190.2.1	Sly00563065 Sly00563066 Sly00563069 Sly00563070 Sly00563075 Sly00563077 Sly00563091 Sly00563083 Sly00563082 Sly00563076 Sly00546765 Sly00563084 Sly00563092 Sly00563078 Sly00563081 Sly00563093 Sly00563087 Sly00563085
Solyc11g073200.2.1	Sly00563086 Sly00563101 Sly00546771 Sly00546769 Sly00546772
Solyc11g073300.2.1	Sly00563131 Sly00563132 Sly00563135 Sly00546797 Sly00563134 Sly00546793 Sly00563139 Sly00563142 Sly00546794 Sly00546799 Sly00563144
Solyc11g005640.2.1	Sly00555805 Sly00526964 Sly00555806 Sly00526965
Solyc11g005660.2.1	Sly00555808 Sly00555807 Sly00555810 Sly00542689 Sly00542690
Solyc11g050822.1.1	Sly00550406
Solyc11g050850.1.1	Sly00550407 Sly00550408
Solyc11g005670.2.1	Sly00546917 Sly00526970 Sly00546930 Sly00546929 Sly00546932 Sly00526974 Sly00546925 Sly00546928 Sly00546927 Sly00546931 Sly00526971 Sly00542693 Sly00526972 Sly00526976 Sly00526973 Sly00526975 Sly00546926 Sly00546933 Sly00546924 Sly00526977 Sly00526981 Sly00542694 Sly00546918 Sly00546922
Solyc11g050826.1.1	Sly00550416 Sly00550417 Sly00550418
Solyc11g050880.2.1	Sly00550419 Sly00532336 Sly00602872 Sly00532339
Solyc11g050890.2.1	Sly00532349 Sly00532350 Sly00550421 Sly00532352 Sly00532355 Sly00550423 Sly00532354 Sly00532356 Sly00532357 Sly00532353 Sly00550422 Sly00532359 Sly00532358
Solyc11g005690.2.1	Sly00546940 Sly00546941 Sly00546943 Sly00546946 Sly00546942 Sly00546950 Sly00546949 Sly00546957 Sly00546948
Solyc11g013530.2.1	Sly00529505 Sly00549227 Sly00549218 Sly00549225 Sly00549219 Sly00549216 Sly00549215 Sly00549220 Sly00549232 Sly00529504 Sly00549217 Sly00549223 Sly00529506 Sly00549226 Sly00529507
Solyc11g044860.2.1	Sly00559845 Sly00544891 Sly00559846 Sly00559847
Solyc11g013390.2.1	Sly00558135 Sly00558139
Solyc11g013393.1.1	Sly00543853 Sly00558138 Sly00558136 Sly00558137
Solyc11g013490.2.1	Sly00529493 Sly00549199 Sly00549200 Sly00549201 Sly00549205 Sly00549209 Sly00549202 Sly00529495 Sly00549212 Sly00549206 Sly00549211 Sly00529494 Sly00549204
Solyc11g013500.1.1	Sly00558164 Sly00543865
Solyc11g013467.1.1	Sly00558150 Sly00558149 Sly00558151 Sly00558155 Sly00558161 Sly00558153
Solyc11g005710.2.1	Sly00527008 Sly00546960 Sly00546961 Sly00546962 Sly00527009 Sly00546964
Solyc11g005730.2.1	Sly00546968 Sly00546970 Sly00546971 Sly00546969 Sly00527012 Sly00546972
Solyc11g005680.2.1	Sly00555813 Sly00555814 Sly00542700 Sly00542697 Sly00542698 Sly00555815 Sly00542702 Sly00542696 Sly00542699
Solyc11g005800.2.1	Sly00555821 Sly00555822 Sly00555823 Sly00555824
Solyc11g005790.2.1	Sly00546984 Sly00546985 Sly00546982 Sly00546983 Sly00527026 Sly00527028
Solyc11g050820.1.1	Sly00558993 Sly00558994 Sly00544387 Sly00559012
Solyc11g044910.2.1	Sly00544863 Sly00544864 Sly00559787 Sly00559789 Sly00544865 Sly00559788 Sly00559790 Sly00544866
Solyc11g044900.2.1	Sly00559792 Sly00559793 Sly00559794 Sly00559796 Sly00544877 Sly00544873 Sly00559803 Sly00559798 Sly00559807 Sly00559811 Sly00559805 Sly00559802 Sly00544875 Sly00559797
Solyc11g005840.2.1	Sly00555843 Sly00542732 Sly00555844
Solyc11g044880.2.1	Sly00559813 Sly00559815 Sly00559814 Sly00559818 Sly00559822 Sly00559816 Sly00559826
Solyc11g005810.2.1	Sly00555825 Sly00555827 Sly00555828 Sly00555832 Sly00555834 Sly00542730 Sly00555838 Sly00555829 Sly00555839 Sly00555837 Sly00555830 Sly00555831 Sly00555836 Sly00555840 Sly00555835
Solyc11g005860.2.1	Sly00542736 Sly00546990 Sly00546992 Sly00546994 Sly00546993 Sly00546995
Solyc11g005910.2.1	Sly00546998 Sly00546997 Sly00527048 Sly00546999 Sly00547001 Sly00547002 Sly00547000
Solyc11g005830.2.1	Sly00527039 Sly00546989
Solyc11g050760.2.1	Sly00550381 Sly00532179
Solyc11g005940.2.1	Sly00555865 Sly00555866 Sly00555869 Sly00555870 Sly00555873 Sly00542744 Sly00555867 Sly00542746 Sly00555872 Sly00542742 Sly00542743 Sly00542745 Sly00555871 Sly00555868 Sly00555875 Sly00555878 Sly00555879
Solyc11g005920.2.1	Sly00547005 Sly00527050 Sly00527051 Sly00527052 Sly00547006 Sly00547013 Sly00547016 Sly00547019 Sly00527057 Sly00527054 Sly00547015 Sly00547020 Sly00527053 Sly00547009 Sly00547007 Sly00547025 Sly00547008 Sly00547022 Sly00547026 Sly00547021 Sly00547035 Sly00527059 Sly00547028 Sly00527055 Sly00547023
Solyc11g044680.2.1	Sly00559878
Solyc11g044610.1.1	Sly00559883 Sly00559884 Sly00559885 Sly00535857
Solyc11g050800.1.1	Sly00532203 Sly00550388
Solyc11g013293.1.1	Sly00558084 Sly00558085 Sly00558087 Sly00558089 Sly00558104 Sly00558086 Sly00558088 Sly00558091 Sly00558108 Sly00543839
Solyc11g013260.2.1	Sly00549134 Sly00549136 Sly00549138 Sly00549135 Sly00549137 Sly00529388
Solyc11g044630.1.1	Sly00551667 Sly00551668
Solyc11g044632.1.1	Sly00551671 Sly00551672
Solyc11g013270.2.1	Sly00558081 Sly00558080 Sly00558079
Solyc11g044593.1.1	Sly00559892 Sly00559894
Solyc11g044590.2.1	Sly00559893 Sly00559895
Solyc11g013240.2.1	Sly00529377 Sly00558059 Sly00543833 Sly00558062 Sly00529378 Sly00558064 Sly00558069 Sly00558061 Sly00558067
Solyc11g013235.1.1	Sly00543832 Sly00558071 Sly00558060 Sly00558077
Solyc11g044560.2.1	Sly00551673 Sly00535868 Sly00535870 Sly00551675 Sly00535866 Sly00551677 Sly00551678 Sly00535867 Sly00551680 Sly00551684 Sly00551681
Solyc11g006030.1.1	Sly00555895 Sly00542758
Solyc11g006020.2.1	Sly00555892 Sly00555893 Sly00542756 Sly00542757 Sly00542755 Sly00555894
Solyc11g005990.2.1	Sly00555891 Sly00542752 Sly00542751 Sly00542754
Solyc11g006000.2.1	Sly00547053 Sly00547054 Sly00547064 Sly00547060 Sly00547055 Sly00547065
Solyc11g005975.1.1	Sly00547041
Solyc11g005985.1.1	Sly00547043 Sly00527067 Sly00527068 Sly00547044 Sly00547048 Sly00547047 Sly00547046
Solyc11g005960.1.1	Sly00542747 Sly00555883 Sly00555884
Solyc11g005970.1.1	Sly00542749 Sly00555886
Solyc11g050710.2.1	Sly00544375 Sly00558974
Solyc11g006040.2.1	Sly00542759 Sly00555897 Sly00555898 Sly00555899 Sly00555900 Sly00555902 Sly00555901 Sly00555903
Solyc11g013375.1.1	Sly00549156 Sly00549157
Solyc11g013400.2.1	Sly00549160 Sly00549164 Sly00549161 Sly00549174 Sly00549175 Sly00549166 Sly00549178 Sly00529443 Sly00549167 Sly00549165 Sly00549179
Solyc11g013430.2.1	Sly00529453 Sly00529452 Sly00549181 Sly00529454
Solyc11g013340.1.1	Sly00558117 Sly00558116 Sly00558121 Sly00558120 Sly00558123 Sly00543845
Solyc11g013370.2.1	Sly00558128 Sly00558133 Sly00558129 Sly00558132 Sly00543852 Sly00558134 Sly00558130
Solyc11g013345.1.1	Sly00549152 Sly00529433 Sly00549153 Sly00549154 Sly00529432
Solyc11g044740.2.1	Sly00559866 Sly00559867 Sly00559870 Sly00559868 Sly00559869 Sly00559871 Sly00559872
Solyc11g013310.2.1	Sly00549144 Sly00549145
Solyc11g044800.2.1	Sly00559859 Sly00559861 Sly00559860 Sly00544902 Sly00544904
Solyc11g013330.2.1	Sly00529422 Sly00549150
Solyc11g006180.2.1	Sly00542781 Sly00555981 Sly00542783
Solyc11g006140.1.1	Sly00555940 Sly00555939 Sly00555941 Sly00555947 Sly00555957 Sly00555955 Sly00542778
Solyc11g006150.1.1	Sly00555958 Sly00555960 Sly00555961
Solyc11g006160.2.1	Sly00555967 Sly00555968
Solyc11g006190.2.1	Sly00542787 Sly00555983 Sly00555986 Sly00555987 Sly00555984 Sly00542786
Solyc11g006100.1.1	Sly00547078 Sly00527111
Solyc11g006060.1.1	Sly00527096 Sly00547071 Sly00547072 Sly00547073 Sly00547074 Sly00547075
Solyc11g006130.2.1	Sly00555916 Sly00555915 Sly00555918 Sly00555919 Sly00555926 Sly00555920 Sly00555917 Sly00555934 Sly00555935 Sly00555925 Sly00542776 Sly00555921 Sly00542775 Sly00555931 Sly00542777
Solyc11g044450.2.1	Sly00559961 Sly00559962 Sly00559963 Sly00559964 Sly00559965 Sly00559967 Sly00559966 Sly00544936
Solyc11g044480.2.1	Sly00551708 Sly00535921 Sly00551707 Sly00535925 Sly00535922
Solyc11g044455.1.1	Sly00551720 Sly00551721 Sly00551725 Sly00551724 Sly00551727
Solyc11g013120.2.1	Sly00558010 Sly00558011 Sly00558012 Sly00558014 Sly00558015 Sly00558020 Sly00558021 Sly00558016 Sly00558019 Sly00558013 Sly00558018 Sly00558023 Sly00543813 Sly00558022 Sly00543814
Solyc11g005170.2.1	Sly00526815 Sly00546808 Sly00546809 Sly00546810 Sly00546811 Sly00546812 Sly00546814 Sly00546815 Sly00546816 Sly00546817 Sly00546823 Sly00546827 Sly00546828 Sly00526807 Sly00546829 Sly00546813 Sly00546824 Sly00526814 Sly00526808 Sly00526811 Sly00526817 Sly00546830 Sly00546822
Solyc11g005180.1.1	Sly00526819 Sly00546834 Sly00546835
Solyc11g044360.2.1	Sly00551735 Sly00535950 Sly00535951 Sly00535957 Sly00535952 Sly00535953 Sly00535954 Sly00551739 Sly00551738
Solyc11g013020.2.1	Sly00557998 Sly00557995 Sly00557999 Sly00558000
Solyc11g013110.2.1	Sly00529285 Sly00529284 Sly00529286
Solyc11g013030.2.1	Sly00543804 Sly00543803 Sly00558006 Sly00543802 Sly00558002 Sly00558005 Sly00558003 Sly00558008
Solyc11g013080.2.1	Sly00529241 Sly00529242 Sly00529253 Sly00529258 Sly00549056 Sly00529262 Sly00529250 Sly00549085 Sly00529249 Sly00529247 Sly00549096 Sly00529261 Sly00549093 Sly00549062 Sly00549060
Solyc11g013090.2.1	Sly00529234 Sly00529243 Sly00549099 Sly00529244 Sly00549104 Sly00529270 Sly00529273 Sly00529268
Solyc11g013060.1.1	Sly00529238 Sly00529239 Sly00549059 Sly00549063 Sly00549065 Sly00549055 Sly00529235 Sly00549057
Solyc11g013085.1.1	Sly00549075 Sly00549090 Sly00549114 Sly00529278
Solyc11g013083.1.1	Sly00549100 Sly00549102 Sly00549110 Sly00549107 Sly00549103 Sly00529276 Sly00549109
Solyc11g013100.2.1	Sly00549116 Sly00529281 Sly00549117 Sly00529280
Solyc11g005250.2.1	Sly00555717 Sly00555720 Sly00555721 Sly00555718 Sly00555725 Sly00555729 Sly00555727 Sly00555730 Sly00555731
Solyc11g022600.2.1	Sly00544355 Sly00544356 Sly00544357 Sly00558944 Sly00558947 Sly00558946 Sly00544359 Sly00558948 Sly00558961 Sly00544358 Sly00558957 Sly00558950 Sly00558955 Sly00558958 Sly00558949 Sly00544354
Solyc11g044510.2.1	Sly00559907 Sly00559917 Sly00559918 Sly00559933 Sly00559928 Sly00559914 Sly00559935 Sly00559911 Sly00559936 Sly00559939
Solyc11g044530.2.1	Sly00559903 Sly00559905 Sly00544922 Sly00544927 Sly00559906
Solyc11g005190.2.1	Sly00546836 Sly00526823 Sly00546837
Solyc11g005160.1.1	Sly00555687 Sly00555688 Sly00542638
Solyc11g005200.2.1	Sly00555689 Sly00555690 Sly00555691 Sly00555698 Sly00542644 Sly00542641 Sly00555700 Sly00555693 Sly00542643 Sly00555702 Sly00555701
Solyc11g005330.2.1	Sly00542650 Sly00555740 Sly00555738 Sly00555739 Sly00555737 Sly00555744 Sly00555746 Sly00542652
Solyc11g005340.2.1	Sly00555748 Sly00555749 Sly00555750 Sly00555752 Sly00542655 Sly00542653 Sly00542654 Sly00542656 Sly00542657 Sly00555755
Solyc11g044490.1.1	Sly00559952 Sly00559953
Solyc11g013150.1.1	Sly00529338 Sly00549124 Sly00529340 Sly00529339
Solyc11g013155.1.1	Sly00558034
Solyc11g013180.2.1	Sly00558037 Sly00543819 Sly00558038
Solyc11g044470.2.1	Sly00559957 Sly00559958 Sly00559956 Sly00559954 Sly00559955
Solyc11g013190.2.1	Sly00558040 Sly00558042 Sly00558041 Sly00543822 Sly00558046 Sly00543823 Sly00558045
Solyc11g022590.1.1	Sly00531898 Sly00550326 Sly00550325 Sly00550327
Solyc11g022540.2.1	Sly00558918 Sly00558928 Sly00558933 Sly00558919 Sly00558923 Sly00558930 Sly00558921 Sly00558922 Sly00558920 Sly00558925 Sly00558926 Sly00558937 Sly00558931
Solyc11g005400.2.1	Sly00555761 Sly00542673 Sly00555766 Sly00555763 Sly00555765 Sly00542672 Sly00555764
Solyc11g005390.2.1	Sly00526875 Sly00526878
Solyc11g005380.2.1	Sly00526872 Sly00546849 Sly00526873 Sly00546850
Solyc11g005410.2.1	Sly00546851 Sly00526879
Solyc11g012900.2.1	Sly00557937 Sly00557938 Sly00557939 Sly00557942 Sly00557944 Sly00543786 Sly00557968 Sly00557973 Sly00557943 Sly00557962 Sly00557964 Sly00557971 Sly00557947 Sly00557951 Sly00557945 Sly00557940 Sly00557941 Sly00557982 Sly00557946 Sly00557949 Sly00557954 Sly00557970 Sly00557955 Sly00557965 Sly00557967 Sly00543780 Sly00557948 Sly00557956 Sly00557966 Sly00557975 Sly00543785 Sly00557976 Sly00557963 Sly…
Solyc11g012860.2.1	Sly00543763 Sly00557917 Sly00557919 Sly00543765 Sly00543767 Sly00557928 Sly00557921 Sly00557925 Sly00557926 Sly00557920 Sly00557922 Sly00543764
Solyc11g012870.2.1	Sly00543769 Sly00557933 Sly00543771 Sly00557932 Sly00543770
Solyc11g012840.2.1	Sly00529152 Sly00529150 Sly00529151
Solyc11g012850.2.1	Sly00557902 Sly00557903 Sly00557904 Sly00557905 Sly00529149 Sly00557911 Sly00557914 Sly00557910 Sly00557908 Sly00557907 Sly00529148 Sly00557909 Sly00529154 Sly00557913 Sly00557906 Sly00557912
Solyc11g012830.2.1	Sly00548997 Sly00549000 Sly00548998 Sly00548999 Sly00549006 Sly00549004 Sly00549010 Sly00529141 Sly00549008 Sly00549009 Sly00529145 Sly00549005 Sly00529143 Sly00529142
Solyc11g022530.2.1	Sly00558916 Sly00544341
Solyc11g005560.2.1	Sly00526919 Sly00546876 Sly00546875 Sly00546874 Sly00546877 Sly00526920 Sly00546885
Solyc11g005580.1.1	Sly00546886 Sly00526929 Sly00546898 Sly00526931 Sly00546904
Solyc11g005600.2.1	Sly00526924 Sly00526925 Sly00526926 Sly00526922 Sly00526949 Sly00542685 Sly00526945 Sly00555790 Sly00526927 Sly00526939 Sly00526948 Sly00526940 Sly00526923 Sly00526946 Sly00526944 Sly00555794 Sly00526941 Sly00526938 Sly00526942 Sly00526947 Sly00555791 Sly00555792 Sly00555793 Sly00555797 Sly00555799
Solyc11g005520.2.1	Sly00546869 Sly00546870 Sly00526902 Sly00526903 Sly00546871 Sly00526905
Solyc11g005620.1.1	Sly00526963 Sly00526962
Solyc11g013010.2.1	Sly00529215 Sly00549047 Sly00529217 Sly00549050 Sly00549048 Sly00529216 Sly00549049
Solyc11g012950.2.1	Sly00529186 Sly00549039
Solyc11g012970.2.1	Sly00549041 Sly00549042 Sly00549043 Sly00529190 Sly00529188 Sly00529187
Solyc11g012940.2.1	Sly00529178 Sly00529181 Sly00529180 Sly00529179
Solyc11g066540.2.1	Sly00561526 Sly00561527 Sly00561529 Sly00561535 Sly00561538 Sly00561528 Sly00561531 Sly00561548 Sly00561536 Sly00561532 Sly00545896 Sly00561547 Sly00561539 Sly00561541 Sly00561543 Sly00545894 Sly00545899 Sly00561542 Sly00545901 Sly00561546
Solyc11g066620.2.1	Sly00541006 Sly00541008 Sly00553731 Sly00553730 Sly00541007 Sly00553733 Sly00553732
Solyc11g066610.2.1	Sly00553721 Sly00553722 Sly00553724 Sly00553723 Sly00541000
Solyc11g066590.2.1	Sly00553713 Sly00553714 Sly00553715 Sly00553716 Sly00540995 Sly00540996 Sly00553717
Solyc11g066560.3.1	Sly00553696 Sly00540982 Sly00553699 Sly00540974 Sly00553703 Sly00540976 Sly00553700 Sly00540977 Sly00553697 Sly00553698 Sly00553701 Sly00540978 Sly00540983 Sly00553702 Sly00540981 Sly00540984 Sly00553706 Sly00553704 Sly00540979
Solyc11g022390.2.1	Sly00531689 Sly00531692 Sly00550270 Sly00550266 Sly00531695 Sly00550275 Sly00531693 Sly00550269 Sly00531691
Solyc11g022400.1.1	Sly00558899 Sly00558900 Sly00558902 Sly00558901
Solyc11g022470.2.1	Sly00531773 Sly00531775 Sly00550291 Sly00531774 Sly00531776 Sly00531777 Sly00550297 Sly00550292
Solyc11g056270.2.1	Sly00539162 Sly00552715
Solyc11g044340.2.1	Sly00551751 Sly00551752 Sly00551753 Sly00551754 Sly00551760 Sly00551780 Sly00551770 Sly00551768 Sly00551769 Sly00551761 Sly00551772 Sly00551762 Sly00551758 Sly00551776 Sly00551784 Sly00551777 Sly00551781 Sly00551755 Sly00551771 Sly00551766 Sly00536002
Solyc11g066280.2.1	Sly00553594 Sly00540830 Sly00553595 Sly00553597 Sly00540831 Sly00553598 Sly00553596 Sly00553599 Sly00540832 Sly00553602 Sly00553600 Sly00540833 Sly00553601
Solyc11g044330.2.1	Sly00559983 Sly00559984 Sly00559985 Sly00559986 Sly00559988 Sly00559989 Sly00544950 Sly00544952 Sly00559992 Sly00560003 Sly00559987 Sly00544949 Sly00559990 Sly00560009 Sly00560001 Sly00544955 Sly00560002 Sly00560024 Sly00559998 Sly00559997 Sly00560022 Sly00560012 Sly00560021 Sly00560020 Sly00560028 Sly00560025 Sly00544956 Sly00560006
Solyc11g066270.2.1	Sly00540825 Sly00553587 Sly00553586 Sly00553592 Sly00540826
Solyc11g066260.2.1	Sly00561442 Sly00561444 Sly00561445 Sly00561443 Sly00561446 Sly00561449 Sly00561448 Sly00561451
Solyc11g066330.1.1	Sly00540865 Sly00553627 Sly00540868 Sly00553628
Solyc11g066340.2.1	Sly00540869 Sly00540870 Sly00553629 Sly00553633 Sly00553634 Sly00553631 Sly00540886 Sly00553635 Sly00540883 Sly00553630 Sly00553636 Sly00540888 Sly00540884 Sly00553637
Solyc11g006560.2.1	Sly00527213 Sly00527212 Sly00547195 Sly00547196 Sly00547201 Sly00556148 Sly00527214 Sly00527216 Sly00547197 Sly00547198 Sly00547200 Sly00547203 Sly00556150 Sly00547205 Sly00547199 Sly00547204 Sly00547207 Sly00547206 Sly00547202
Solyc11g044310.2.1	Sly00560029 Sly00544962 Sly00560031 Sly00544961
Solyc11g066290.2.1	Sly00561458 Sly00545858 Sly00545861 Sly00561459 Sly00561460
Solyc11g066320.2.1	Sly00553623 Sly00540847 Sly00553624
Solyc11g006450.2.1	Sly00556063 Sly00556064
Solyc11g006440.1.1	Sly00527192 Sly00547182
Solyc11g066360.2.1	Sly00540902 Sly00553649 Sly00540903 Sly00553650
Solyc11g006520.2.1	Sly00556100 Sly00556101 Sly00556102 Sly00556103
Solyc11g006530.2.1	Sly00556107 Sly00542876 Sly00556121 Sly00556118 Sly00556108
Solyc11g006490.2.1	Sly00547188 Sly00527207 Sly00547189 Sly00547191 Sly00547192 Sly00527206 Sly00547193
Solyc11g006470.2.1	Sly00547184 Sly00547185 Sly00547186
Solyc11g056350.1.1	Sly00560686 Sly00560687
Solyc11g056360.2.1	Sly00560688 Sly00560690 Sly00560689 Sly00560691 Sly00560692 Sly00560693
Solyc11g056400.2.1	Sly00552720 Sly00552721 Sly00552722
Solyc11g056450.2.1	Sly00545336 Sly00560699
Solyc11g006540.2.1	Sly00556126 Sly00556131 Sly00556128 Sly00556125 Sly00556129 Sly00556130
Solyc11g006550.3.1	Sly00542884 Sly00556137 Sly00556138 Sly00556141 Sly00556140 Sly00556139 Sly00556142 Sly00542881 Sly00542879 Sly00542887 Sly00542883 Sly00542886 Sly00542882 Sly00556144 Sly00556145 Sly00556147
Solyc11g006570.2.1	Sly00542889 Sly00527217 Sly00556149 Sly00547208 Sly00556153 Sly00542888 Sly00556154
Solyc11g056470.2.1	Sly00552729 Sly00552730
Solyc11g044270.2.1	Sly00551814 Sly00551822 Sly00536067 Sly00536075 Sly00551815 Sly00536049 Sly00536047 Sly00551821 Sly00551832 Sly00536074 Sly00551818 Sly00551824 Sly00551823 Sly00536064 Sly00536058 Sly00536060 Sly00536056 Sly00551827 Sly00536080 Sly00551825 Sly00551816 Sly00536065 Sly00551817 Sly00551833 Sly00536081
Solyc11g066380.2.1	Sly00553652 Sly00553653 Sly00553657 Sly00553655 Sly00553656 Sly00553660 Sly00553663 Sly00553664 Sly00553662 Sly00553658 Sly00540913 Sly00553665 Sly00553666 Sly00553661
Solyc11g066410.2.1	Sly00561472 Sly00561477 Sly00561473 Sly00561474 Sly00561475 Sly00561476 Sly00545871 Sly00545872 Sly00561480 Sly00545875 Sly00561483 Sly00545873 Sly00561482
Solyc11g044250.2.1	Sly00536091 Sly00551834 Sly00536090 Sly00536086 Sly00551836 Sly00536089 Sly00551841 Sly00536092 Sly00551847 Sly00536087 Sly00551835 Sly00551859 Sly00536099 Sly00551851 Sly00551843
Solyc11g044255.1.1	Sly00551868 Sly00551849
Solyc11g066390.2.1	Sly00540927 Sly00553672 Sly00540929 Sly00553674 Sly00553670 Sly00540931 Sly00540926
Solyc11g066440.2.1	Sly00561484 Sly00561485 Sly00545878 Sly00540945 Sly00561490 Sly00561489 Sly00545876 Sly00561486 Sly00561487 Sly00540946 Sly00561488
Solyc11g066450.2.1	Sly00561492 Sly00545884 Sly00561491 Sly00561493
Solyc11g066470.1.1	Sly00545886 Sly00561501 Sly00561502 Sly00561503 Sly00561505 Sly00561504 Sly00561508
Solyc11g066480.2.1	Sly00561511 Sly00561512 Sly00561513 Sly00561517 Sly00561515 Sly00561522 Sly00561518 Sly00561521 Sly00561524 Sly00545889 Sly00561519
Solyc11g066500.2.1	Sly00553679 Sly00553680 Sly00540960 Sly00553681 Sly00553682 Sly00540961 Sly00540962 Sly00540963
Solyc11g006320.2.1	Sly00556038 Sly00556041 Sly00556045 Sly00556042 Sly00556051 Sly00556043 Sly00556050 Sly00556053 Sly00556047 Sly00556048 Sly00556040 Sly00556049 Sly00556046 Sly00556052
Solyc11g066510.2.1	Sly00545892 Sly00545893
Solyc11g006350.1.1	Sly00542813 Sly00542812 Sly00542811
Solyc11g006340.2.1	Sly00527163 Sly00547154 Sly00527161 Sly00547155 Sly00527162 Sly00547153 Sly00527164 Sly00547157
Solyc11g006370.2.1	Sly00527169 Sly00527168 Sly00547160 Sly00527170 Sly00547161 Sly00547163 Sly00547162 Sly00547159
Solyc11g006380.2.1	Sly00527176 Sly00527177
Solyc11g006360.1.1	Sly00556054 Sly00556055 Sly00542818 Sly00542819
Solyc11g006410.2.1	Sly00547179 Sly00547181 Sly00547180 Sly00527184
Solyc11g006420.2.1	Sly00556056 Sly00556060 Sly00556061 Sly00556062
Solyc11g038350.1.1	Sly00539155 Sly00552711
Solyc11g039360.1.1	Sly00539149 Sly00539150 Sly00552708 Sly00552709 Sly00552710
Solyc11g039370.2.1	Sly00560672 Sly00560673
Solyc11g066040.2.1	Sly00540644 Sly00540645 Sly00540646
Solyc11g066050.1.1	Sly00545810 Sly00561407
Solyc11g043110.2.1	Sly00560075 Sly00544991
Solyc11g066020.2.1	Sly00561402 Sly00545802 Sly00561403 Sly00545806 Sly00561404
Solyc11g043080.2.1	Sly00560077
Solyc11g043070.2.1	Sly00551950 Sly00536220 Sly00551955 Sly00551953 Sly00536216 Sly00536218 Sly00536219 Sly00551957 Sly00551956 Sly00551960
Solyc11g043060.1.1	Sly00551951 Sly00551952 Sly00551954 Sly00536217 Sly00551958 Sly00551959
Solyc11g043210.2.1	Sly00560050 Sly00560056 Sly00560058 Sly00560051 Sly00544978 Sly00560063 Sly00560065 Sly00560066 Sly00560062 Sly00544979 Sly00560061 Sly00560069 Sly00560070 Sly00560067
Solyc11g043130.2.1	Sly00536185 Sly00551936 Sly00551930 Sly00551935 Sly00536186 Sly00551937 Sly00551933 Sly00551941
Solyc11g043150.2.1	Sly00536154 Sly00536155 Sly00551890 Sly00551914 Sly00536157 Sly00536165 Sly00551902 Sly00551889 Sly00536159 Sly00551901 Sly00551909 Sly00551900 Sly00551911 Sly00551915 Sly00551913 Sly00536166 Sly00536163 Sly00551888
Solyc11g043155.1.1	Sly00551885 Sly00551886 Sly00551887 Sly00536156 Sly00551892 Sly00551894 Sly00551893 Sly00551897 Sly00551898 Sly00551906 Sly00551907 Sly00551895 Sly00551896 Sly00551891 Sly00551899 Sly00551910 Sly00551903 Sly00551905 Sly00551904 Sly00551908
Solyc11g056630.1.1	Sly00539492 Sly00552771
Solyc11g066060.2.1	Sly00540655 Sly00540656 Sly00553522 Sly00540658 Sly00540678 Sly00540686 Sly00540661
Solyc11g066090.1.1	Sly00553524 Sly00553526 Sly00553533 Sly00540724 Sly00553536
Solyc11g066100.2.1	Sly00545822 Sly00561417 Sly00545821 Sly00545820
Solyc11g066080.1.1	Sly00561414 Sly00561415
Solyc11g066160.1.1	Sly00540776 Sly00540777 Sly00540778 Sly00540779 Sly00540780 Sly00553572 Sly00553573 Sly00540784 Sly00540785
Solyc11g051125.1.1	Sly00559068
Solyc11g042990.2.1	Sly00545000 Sly00560085 Sly00560089 Sly00544996 Sly00545001 Sly00544998 Sly00560091 Sly00560083 Sly00544999 Sly00560096 Sly00560084 Sly00560088
Solyc11g066110.2.1	Sly00553537 Sly00540742 Sly00540740 Sly00553539 Sly00540738 Sly00553540 Sly00540737 Sly00540741 Sly00540744
Solyc11g043010.1.1	Sly00551971 Sly00551972 Sly00551976 Sly00551974 Sly00551977
Solyc11g066120.2.1	Sly00561420 Sly00561421 Sly00545847
Solyc11g066150.2.1	Sly00553548 Sly00553547 Sly00553565 Sly00540774 Sly00553550 Sly00553562 Sly00553553 Sly00553567 Sly00553563
Solyc11g056590.2.1	Sly00539310 Sly00552757 Sly00552758
Solyc11g027645.1.1	Sly00550519 Sly00532715
Solyc11g051200.1.1	Sly00550481 Sly00532704
Solyc11g066250.2.1	Sly00561434 Sly00561433 Sly00561435 Sly00561437 Sly00561436 Sly00561438 Sly00561441
Solyc11g051160.2.1	Sly00532672 Sly00550461 Sly00550465 Sly00550463 Sly00550466 Sly00550464
Solyc11g042890.2.1	Sly00536315 Sly00536314 Sly00551988
Solyc11g065820.2.1	Sly00540550 Sly00561319 Sly00561321 Sly00561325 Sly00561328 Sly00561329 Sly00561331 Sly00561332 Sly00561333 Sly00561334 Sly00540551 Sly00561320 Sly00561326 Sly00545743 Sly00561348 Sly00540552 Sly00561335 Sly00545744 Sly00561338 Sly00561337 Sly00561324 Sly00540553 Sly00561351 Sly00561323
Solyc11g065830.2.1	Sly00561299 Sly00561353
Solyc11g065750.2.1	Sly00561301 Sly00561302 Sly00561303 Sly00561305 Sly00561304 Sly00561307 Sly00545737 Sly00561308
Solyc11g065760.2.1	Sly00561313 Sly00561311 Sly00561312 Sly00561315 Sly00561314
Solyc11g012563.1.1	Sly00557835 Sly00557838 Sly00529054 Sly00529060 Sly00529055 Sly00557839 Sly00557843 Sly00529061 Sly00529056 Sly00557840 Sly00557837 Sly00543703 Sly00529059 Sly00529062 Sly00557845
Solyc11g012540.2.1	Sly00529028 Sly00529030 Sly00529031 Sly00529033 Sly00548864 Sly00529029 Sly00529032 Sly00548870 Sly00529027 Sly00548873 Sly00548866 Sly00548880 Sly00529034 Sly00548878 Sly00548877
Solyc11g012550.2.1	Sly00548865 Sly00548869 Sly00548885 Sly00529037 Sly00529041 Sly00548868 Sly00548871 Sly00548886 Sly00529038 Sly00529039 Sly00529043 Sly00548892 Sly00529046 Sly00529045 Sly00529052 Sly00548894 Sly00548903 Sly00548872 Sly00548895 Sly00548893 Sly00548902 Sly00529047 Sly00548874 Sly00548901 Sly00529051 Sly00529050 Sly00548888 Sly00548904 Sly00529049 Sly00548907 Sly00548905
Solyc11g042940.2.1	Sly00560110 Sly00560120 Sly00560118 Sly00560117 Sly00560122 Sly00560116 Sly00560119 Sly00560131 Sly00545005 Sly00560115 Sly00560112 Sly00560121 Sly00560114 Sly00560124 Sly00560135 Sly00560133
Solyc11g042930.2.1	Sly00536287 Sly00551982 Sly00551983 Sly00536289 Sly00536291 Sly00536288
Solyc11g012620.2.1	Sly00557855 Sly00557856 Sly00543705 Sly00543707 Sly00557857 Sly00557861 Sly00557866 Sly00557860 Sly00543709
Solyc11g042920.2.1	Sly00560140 Sly00560141 Sly00560142 Sly00560143 Sly00560144 Sly00560145
Solyc11g061700.2.1	Sly00560724 Sly00560725 Sly00545394
Solyc11g065890.2.1	Sly00540570 Sly00540571 Sly00553451 Sly00553453 Sly00553457 Sly00553450 Sly00553455 Sly00540574 Sly00553458 Sly00553462 Sly00540573
Solyc11g065870.2.1	Sly00553420 Sly00553421 Sly00553422 Sly00553442 Sly00553427 Sly00553445
Solyc11g056680.1.1	Sly00552788 Sly00539599 Sly00552789 Sly00539600 Sly00552790
Solyc11g050821.1.1	Sly00559018 Sly00559019 Sly00544394
[truncated: 21,234 more rows]
